# Supplementary material for: Cross-sectional study of preprints and final journal publications from COVID-19 studies: discrepancies in results reporting and spin in interpretation
Source: PubMed Central journal article supplement — BMJ Open. 2021 Jul 16;11(7):e051821. doi: 10.1136/bmjopen-2021-051821 (PMC8288242; doi:10.1136/bmjopen-2021-051821), 2021-07-16
Supplement: bmjopen-2021-051821.draft_revisions.pdf [file bmjopen-2021-051821.draft_revisions.pdf]

# BMJ Open

BMJ Open is committed to open peer review. As part of this commitment we make the peer review history of every article we publish publicly available.

When an article is published we post the peer reviewers' comments and the authors' responses online. We also post the versions of the paper that were used during peer review. These are the versions that the peer review comments apply to.

The versions of the paper that follow are the versions that were submitted during the peer review process. They are not the versions of record or the final published versions. They should not be cited or distributed as the published version of this manuscript.

BMJ Open is an open access journal and the full, final, typeset and author-corrected version of record of the manuscript is available on our site with no access controls, subscription charges or pay-per-view fees (<http://bmjopen.bmj.com>).

If you have any questions on BMJ Open's open peer review process please email [info.bmjopen@bmj.com](mailto:info.bmjopen@bmj.com)

# BMJ Open

## Comparison of preprints and final journal publications from COVID-19 Studies: Discrepancies in results reporting and spin in interpretation

|                               |                                                                                                                                                                                                                                                                                                                                                                                                                                                                                                                                                                                                                                                                                                                                                                                                                                                                                                                                             |
|-------------------------------|---------------------------------------------------------------------------------------------------------------------------------------------------------------------------------------------------------------------------------------------------------------------------------------------------------------------------------------------------------------------------------------------------------------------------------------------------------------------------------------------------------------------------------------------------------------------------------------------------------------------------------------------------------------------------------------------------------------------------------------------------------------------------------------------------------------------------------------------------------------------------------------------------------------------------------------------|
| Journal:                      | <i>BMJ Open</i>                                                                                                                                                                                                                                                                                                                                                                                                                                                                                                                                                                                                                                                                                                                                                                                                                                                                                                                             |
| Manuscript ID                 | bmjopen-2021-051821                                                                                                                                                                                                                                                                                                                                                                                                                                                                                                                                                                                                                                                                                                                                                                                                                                                                                                                         |
| Article Type:                 | Original research                                                                                                                                                                                                                                                                                                                                                                                                                                                                                                                                                                                                                                                                                                                                                                                                                                                                                                                           |
| Date Submitted by the Author: | 30-Mar-2021                                                                                                                                                                                                                                                                                                                                                                                                                                                                                                                                                                                                                                                                                                                                                                                                                                                                                                                                 |
| Complete List of Authors:     | Bero, Lisa; University of Colorado - Anschutz Medical Campus, General Internal Medicine / Public Health / Center for Bioethics and Humanities<br>Lawrence, Rosa; University of Colorado - Anschutz Medical Campus, General Internal Medicine / Public Health / Center for Bioethics and Humanities<br>Leslie, Louis; University of Colorado - Anschutz Medical Campus, General Internal Medicine / Public Health / Center for Bioethics and Humanities<br>Chiu, Kellia; The University of Sydney,<br>McDonald, Sally; The University of Sydney<br>Page, Matthew; Monash University, School of Public Health and Preventive Medicine; Monash University<br>Grundy, Quinn; University of Sydney, Faculty of Nursing<br>Parker, Lisa; The University of Sydney, Centre for Values, Ethics and the Law in Medicine<br>Boughton, Stephanie; Cochrane<br>Kirkham, Jamie J.; Manchester University, Biostatistics<br>Featherstone, Robin; Cochrane |
| Keywords:                     | ETHICS (see Medical Ethics), PUBLIC HEALTH, QUALITATIVE RESEARCH                                                                                                                                                                                                                                                                                                                                                                                                                                                                                                                                                                                                                                                                                                                                                                                                                                                                            |
|                               |                                                                                                                                                                                                                                                                                                                                                                                                                                                                                                                                                                                                                                                                                                                                                                                                                                                                                                                                             |

SCHOLARONE™  
Manuscripts

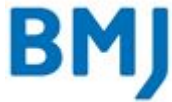

I, the Submitting Author has the right to grant and does grant on behalf of all authors of the Work (as defined in the below author licence), an exclusive licence and/or a non-exclusive licence for contributions from authors who are: i) UK Crown employees; ii) where BMJ has agreed a CC-BY licence shall apply, and/or iii) in accordance with the terms applicable for US Federal Government officers or employees acting as part of their official duties; on a worldwide, perpetual, irrevocable, royalty-free basis to BMJ Publishing Group Ltd ("BMJ") its licensees and where the relevant Journal is co-owned by BMJ to the co-owners of the Journal, to publish the Work in this journal and any other BMJ products and to exploit all rights, as set out in our [licence](#).

The Submitting Author accepts and understands that any supply made under these terms is made by BMJ to the Submitting Author unless you are acting as an employee on behalf of your employer or a postgraduate student of an affiliated institution which is paying any applicable article publishing charge ("APC") for Open Access articles. Where the Submitting Author wishes to make the Work available on an Open Access basis (and intends to pay the relevant APC), the terms of reuse of such Open Access shall be governed by a Creative Commons licence – details of these licences and which [Creative Commons](#) licence will apply to this Work are set out in our licence referred to above.

Other than as permitted in any relevant BMJ Author's Self Archiving Policies, I confirm this Work has not been accepted for publication elsewhere, is not being considered for publication elsewhere and does not duplicate material already published. I confirm all authors consent to publication of this Work and authorise the granting of this licence.

1  
2  
3 **Comparison of preprints and final journal publications from COVID-19 Studies: Discrepancies**  
4 **in results reporting and spin in interpretation**  
5

6 Lisa Bero, PhD (corresponding author)  
7

8 Professor of Medicine and Public Health  
9  
10 Chief Scientist, Center for Bioethics and Humanities  
11  
12 University of Colorado Anschutz Medical Campus  
13  
14 13080 E. 19<sup>th</sup> Ave, Aurora, CO 80045 | Mail Stop B137  
15

16 [lisa.bero@CUAnschutz.edu](mailto:lisa.bero@CUAnschutz.edu)  
17

18 ORCID ID: 0000 0003 1893 6651  
19

20 Rosa Lawrence, BA  
21

22 Professional Research Assistant  
23  
24 Center for Bioethics and Humanities  
25  
26 University of Colorado Anschutz Medical Campus  
27  
28

29 [rosa.lawrence@cuanschutz.edu](mailto:rosa.lawrence@cuanschutz.edu)  
30

31 ORCID ID: 0000 0001 7954 5860  
32

33 Louis Leslie, BA  
34

35 Research Assistant  
36  
37 Center for Bioethics and Humanities  
38  
39 University of Colorado Anschutz Medical Campus  
40  
41

42 [louis.lesile@cuanschutz.edu](mailto:louis.lesile@cuanschutz.edu)  
43

44 ORCID ID: 0000 0002 4013 4914  
45

46 Kellia Chiu, BPharm (Hons)  
47

48 PhD Candidate  
49  
50 Charles Perkins Centre & School of Pharmacy, Faculty of Medicine and Health  
51  
52 The University of Sydney, Sydney, Australia  
53  
54

55 [kellia.chiu@sydney.edu.au](mailto:kellia.chiu@sydney.edu.au)  
56  
57

1  
2  
3 ORCID: 0000-0002-4358-6641  
4

5 Sally McDonald, MNutrDiet  
6

7 PhD Candidate  
8

9 Charles Perkins Centre & School of Pharmacy, Faculty of Medicine and Health  
10

11 The University of Sydney, Sydney, Australia  
12

13 [sally.mcdonald@sydney.edu.au](mailto:sally.mcdonald@sydney.edu.au)  
14

15 ORCID:0000-0002-1406-3016  
16

17 Matthew J Page, PhD  
18

19 Senior Research Fellow  
20

21 School of Public Health and Preventive Medicine  
22

23 Monash University, Melbourne, Australia  
24

25 [matthew.page@monash.edu](mailto:matthew.page@monash.edu)  
26

27 ORCID: 0000-0002-4242-7526  
28

29 Quinn Grundy, RN, PhD  
30

31 Assistant Professor  
32

33 Lawrence S. Bloomberg Faculty of Nursing, University of Toronto  
34

35 [quinn.grundy@utoronto.ca](mailto:quinn.grundy@utoronto.ca)  
36

37 ORCID: 0000-0002-7640-8614  
38

39 Lisa Parker, MBBS (Hons), PhD  
40

41 Honorary Lecturer  
42

43 Charles Perkins Centre and School of Pharmacy, Faculty of Medicine and Health  
44

45 The University of Sydney, Sydney, Australia  
46

47 [lisa.parker@sydney.edu.au](mailto:lisa.parker@sydney.edu.au)  
48

49 ORCID: 0000-0001-8635-6953  
50

51 Stephanie L Boughton, MBBS  
52

53 Research Integrity Editor  
54

55 Editorial and Methods Department, Cochrane, UK  
56  
57

1  
2  
3 E: [sboughton@cochrane.org](mailto:sboughton@cochrane.org)  
4

5 ORCID: 0000-0001-5374-7464  
6  
7

8 Jamie J Kirkham, BSc, MSc, PhD  
9

10 Professor of Biostatistics  
11

12 Centre for Biostatistics, Manchester Academic Health Science Centre  
13

14 University of Manchester, Manchester, United Kingdom  
15

16 [jamie.kirkham@manchester.ac.uk](mailto:jamie.kirkham@manchester.ac.uk)  
17

18 ORCID: 0000-0003-2579-9325  
19  
20

21 Robin Featherstone, MLIS  
22

23 Information Specialist  
24

25 Cochrane Editorial and Methods Department UK  
26

27 [rfeatherstone@cochrane.org](mailto:rfeatherstone@cochrane.org)  
28

29 ORCID: 0000-0003-2517-2258  
30  
31  
32  
33  
34  
35  
36  
37  
38  
39  
40  
41  
42  
43  
44  
45  
46  
47  
48  
49  
50  
51  
52  
53  
54  
55  
56  
57  
58  
59  
60

**What is already known on this topic.**

- Selective and incomplete reporting of results and spin are threats to the trustworthiness and validity of research.
- These reporting practices could be particularly dangerous for users of COVID-19 research as they can inflate the efficacy of interventions and underestimate harms.
- Given the high prevalence, visibility, and potentially rapid implementation of COVID-19 research published as preprints, it is important to compare components of results reporting and the presence of spin in COVID-19 studies on treatment or prevention that are published both as preprints and journal publications.

**What this study adds.**

- This comparison of 67 COVID-19 preprints related to treatment or prevention and their subsequent journal publications found they were largely similar in reporting of study characteristics, components of results reporting and spin in interpretation.
- Even a few important discrepancies could impact decision making.

## ABSTRACT

Objective: To compare results reporting and the presence of spin in COVID-19 study preprints with their finalized journal publications

Design: Cross-sectional

Setting: International medical literature

Participants: Preprints and final journal publications of 67 interventional and observational studies of COVID-19 treatment or prevention from the Cochrane COVID-19 Study Register published between March 1, 2020 and October 30, 2020

Main outcome measures: Study characteristics and discrepancies in 1) Results reporting (number of outcomes, outcome descriptor, measure, metric, assessment time point, data reported, reported statistical significance of result, type of statistical analysis, subgroup analyses (if any), whether outcome was identified as primary or secondary and 2) Spin (reporting practices that distort the interpretation of results so they are viewed more favorably).

Results: Of 67 included studies, 23 (34%) had no discrepancies in results reporting between preprints and journal publications. Fifteen (22%) studies had at least one outcome that was included in the journal publication, but not the preprint; 8 (12%) had at least one outcome that was reported in the preprint only. For outcomes that were reported in both preprints and journals, common discrepancies were differences in numerical values and statistical significance, additional statistical tests and subgroup analyses and longer follow-up times for outcome assessment in journal publications.

At least one instance of spin occurred in both preprints and journals in 23 / 67 (34%) studies, the preprint only in 5 (7%), and the journal publications only in 2 (3%). Spin was removed between the preprint and journal publication in 5/67 (7%) studies; but added in 1/67 (1%) study.

Conclusions: The COVID-19 preprints and their subsequent journal publications were largely similar in reporting of study characteristics, outcomes and spin. All COVID-19 studies published as preprints and journal publications should be critically evaluated for discrepancies and spin.



## Article summary

### Strengths and limitations of this study

- We selected studies from the Cochrane COVID-19 Register rather than conducting a literature search. The Cochrane COVID-19 Register has been optimized to identify COVID-19 clinical research for systematic reviews. As a study-based register, all records related to a study are identified, enabling us to obtain all preprint and journal publication versions for a single study.
- We compared the first version of the preprint with the final journal publication. We may have identified a different number of discrepancies if we compared later versions of the preprint with the journal publication.
- Although clinically important, our focus on COVID-19 research may not be representative of other types of research published as preprints, then journal publications. This study should be replicated in a sample of non-COVID related interventional and observational clinical studies.
- We limited our sample to reprints which authors deemed of high enough quality to submit to journal and that were published. Future research could also include assessment of outcome reporting components and spin in preprints that have not been published in journals.
- Although we compared non-peer-reviewed preprints to their accompanying journal publications, we did not directly assess the effects of peer review.

### **EQUATOR REPORTING GUIDELINE: STROBE**

Contributorship, funding statement, data sharing statements, etc at end of manuscript.

## **INTRODUCTION**

Preprints have been advocated as a means for rapid sharing and updating of research findings, which could be particularly valuable during a pandemic.[1] Preprints are non-peer-reviewed postings of research articles. Preprints have been a common form of publication in the natural sciences for decades, and more recently in the life sciences. In 2019, BMJ, Yale and Cold Spring Harbor Laboratory launched medRxiv, a preprint server dedicated to clinical and health sciences research.

In April 2020, medRxiv published between 50 and 100 COVID-19-related preprints daily.[1] The accelerated pace of research related to COVID-19 has increased the potential impact and risk of using preprints. Widespread public dissemination of preprints may spread misinformation.[2] A study comparing 34 preprints and 62 publications about therapies for COVID-19 found that publications had significantly more citations than the preprints (median of 22 vs 5.5 citations;  $P = .01$ ), but there were no significant differences for attention and online engagement metrics.[3]

Most preprint servers conduct some type of screening prior to posting, commonly related to the scope of the article, plagiarism, and compliance with legal and ethical requirements[4], but preprints have not been peer-reviewed and may not meet the methodological and reporting requirements of a journal. A review of the medRxiv preprint server one year after its launch found that 9967 of 11164 (89%) of submissions passed screening.[5] It is not clear whether or how preprint servers might screen for quality of results reporting or spin.[6,7] Spin refers to specific reporting practices that distort the interpretation of results so that results are viewed more favorably.

Preliminary studies suggest that reporting discrepancies may exist between preprints and subsequent publications. However, there has been no systematic assessments of results reporting or spin between preprints and their final journal publications. Carneiro et al. counted reported items from a checklist meant to cover common points from multiple reporting

1  
2  
3 guidelines and found reporting to be a little higher in journal articles, both in a set of bioRxiv  
4 preprints matched to their journal publication (n=56 article/group) and in an unmatched set  
5 (n=76 articles/group).[8] An analysis of preprints from arXiv, a primarily physics/ mathematics  
6 preprint server, and their journal publications using text comparison algorithms found little  
7 difference between preprints and published articles.[9] However, an analysis of medRxiv and  
8 bioRxiv preprints related to COVID-19 pharmacological interventions found that only 24%  
9 (23/97) of preprints were published in a journal within 0 to 98 days (median: 42.0 days). Among  
10 these, almost half (11/23, 48%) had modifications in the title or results section, although the  
11 nature of these modifications is not described.[10] An analysis of spin in preprints and journal  
12 publications for COVID-19 trials found a single difference between 2 matched pairs preprint and  
13 their journal publications: the discussion of limitations in the abstract. Limitations were  
14 discussed in the abstract of one article, but not its accompanying preprint. [11] An analysis of  
15 66 preprint-article pairs of COVID-19 studies found 38% had changes in study results, such as a  
16 numeric change in hazard ratio or a change in p value, and 29% had changes in abstract  
17 conclusions, most commonly from positive without reporting uncertainty in the preprint to  
18 positive with reporting of uncertainty in the article.[12]

19  
20  
21  
22  
23  
24  
25  
26  
27  
28  
29  
30  
31  
32  
33  
34 The trustworthiness and validity of scientific publications, even after peer review, are  
35 weakened by a variety of problems.[13,14] Selective and incomplete results reporting[15,16]  
36 and spin[17,18] are two critical threats, especially for clinical studies of treatment or  
37 prevention. These reporting practices could be particularly dangerous for users of COVID-19  
38 research as they can inflate the efficacy of interventions and underestimate harms. Given the  
39 high prevalence, visibility, and potentially rapid implementation of COVID-19 research  
40 published as preprints, this study is the first to compare components of outcome reporting and  
41 the presence of spin in COVID-19 studies on treatment or prevention that are published both as  
42 preprints and journal publications.

## 53 **METHODS**

54 The protocol for this study was registered in the Open Science Framework.[19]  
55  
56  
57

1  
2  
3  
4  
5 **Data Source and Search Strategy:** We sampled studies from the Cochrane COVID-19 Study  
6 Register (<https://covid-19.cochrane.org/>), a freely-available, continually-updated, annotated  
7 reference collection of human primary studies on COVID-19, including interventional,  
8 observational, diagnostic, prognostic, epidemiological and qualitative designs. The register is  
9 "study-based," meaning references to the same study (e.g., press releases, trial registry records,  
10 preprints, journal pre-proofs, journal final publications, retraction notices) are all linked to a  
11 single study identifier. References are screened for eligibility to determine if they are primary  
12 studies (e.g., not opinion pieces or narrative reviews). Data sources for the Cochrane COVID-19  
13 Study Register at the time of the search included ClinicalTrials.gov, the International Clinical  
14 Trials Registry Platform (ICTRP), PubMed, medRxiv and Embase.com. The Cochrane register  
15 prioritizes medRxiv as a preprint source as an internal sensitivity analysis in May 2020 showed  
16 that 90% (166/185) of the preprints that were eligible for systematic reviews came from this  
17 source. The register also includes preprints records sourced from PubMed.  
18  
19  
20  
21  
22  
23  
24  
25  
26  
27  
28  
29

30  
31 All studies in the register are classified by study design (interventional, observational,  
32 modelling, qualitative, other or unclear) and research aim (prevention, treatment and  
33 management, diagnostic/prognostic, epidemiology, health services research, mechanism,  
34 transmission, other). Studies may be classified as having multiple research aims.  
35  
36  
37

38 Four searches using the register's search filters for study reference types (preprints and journal  
39 articles) and study characteristics (study type and study aim) were used to retrieve references  
40 with a study aim of a) treatment and management or b) prevention and classified as  
41 interventional or observational (see OSF project for the complete search strategies:  
42 [https://osf.io/5ru8w/?view\\_only=fe509bf54c104354a1e12f011bdff66a](https://osf.io/5ru8w/?view_only=fe509bf54c104354a1e12f011bdff66a)). As the register is  
43 updated daily, we repeated the search. The Cochrane COVID-19 Study Register was first  
44 searched by RF on October 13, and updated on October 29, 2020. Results were exported to  
45 Excel and duplicates manually identified. The searches identified 297 references for 117  
46 studies, with 67 (21 interventional, 46 observational) that met our inclusion and exclusion  
47 criteria for study selection (Figure 1).  
48  
49  
50  
51  
52  
53  
54  
55  
56  
57

1  
2  
3  
4  
5 **Inclusion and exclusion criteria for study selection:** We included studies of COVID-19  
6 treatment or prevention identified in the search that had both a posted preprint and final  
7 journal publication.  
8  
9

10  
11  
12 We included studies with aims of diagnosis/prognosis, epidemiology, health services research,  
13 mechanism, transmission and other if they also had an aim coded as a) treatment and  
14 management or b) prevention. We excluded modelling studies, qualitative studies and studies  
15 that reported only descriptive data (e.g., demographic characteristics).  
16  
17

18 We screened all records for each included study to identify posted preprints and journal  
19 publications from each study. We excluded duplicates and records for protocols, trial registries,  
20 commentaries, letters to the editor, news articles, and press releases. We excluded records  
21 that did not report results and non-English records.  
22  
23  
24  
25  
26  
27

28  
29 We compared the preprint and journal publication for each included study. In the case of  
30 multiple preprints or journal publications reporting study results, we selected the first preprint  
31 version and the final journal publication that reported on similar study populations. This was to  
32 ensure that the preprint version evaluated in our study had not been altered in response to any  
33 comments, which could constitute a form of peer review, and that it was representative of the  
34 version most likely to be seen by clinicians, journalists and other research users as new research  
35 became available.  
36  
37  
38  
39  
40  
41  
42

43 **Data extraction:** Ten investigators (LB, SLB, KC, QG, JJK, LL, RL, SMc, LP, MJP) working  
44 independently in pairs extracted data from the included studies. Discrepancies in data  
45 extraction were resolved by consensus. If agreement could not be reached, an investigator  
46 who was not part of the coding pair resolved the discrepancies. All extracted data from the  
47 included studies was stored in REDCap, a secure web-based application for the collection and  
48 management of data.[20] We extracted data from the medRxiv page and PDF for preprints and  
49  
50  
51  
52  
53  
54  
55  
56  
57  
58  
59  
60

1  
2  
3 the online publication or PDF for journal articles. We extracted data on results reporting,  
4 presence of spin and study characteristics as described below.  
5  
6  
7

8  
9 **Study characteristics:** For each preprint, we recorded the earliest posting date; for each journal  
10 publication we extracted the submitted/received, reviewed, revised, accepted and published  
11 date(s), where available.  
12  
13  
14  
15

16 From each journal publication, we extracted: authors, title, funding source, author conflicts of  
17 interests, ethics approval, country of study, and sample size. For the accompanying preprint, we  
18 determined if these study characteristics were also reported. If they were, and the content of  
19 the item differed between the preprint and publication, details of the discrepancy were  
20 recorded. In addition, we recorded discrepancies between the preprint and journal publication  
21 in demographic characteristics of study participants (e.g., sex, race/ethnicity, diagnosis),  
22 discussion of limitations (regardless of whether there was a labeled limitations section or not),  
23 and tables and figures.  
24  
25  
26  
27  
28  
29  
30  
31

32 **Primary outcomes:** Our primary outcome measures were 1) discrepancies in results reporting  
33 between preprints and journal publications and 2) presence and type of spin in preprints and  
34 journal publications.  
35  
36  
37  
38  
39

#### 40 Results reporting:

41 We collected data on discrepancies in 1) number of outcomes reported in preprints and journal  
42 publications and, for outcomes reported in both preprints and journal publications, 2)  
43 components of results reporting. For each journal publication and preprint, we recorded the  
44 number of outcomes reported and, whether outcomes were reported only in the preprint or  
45 journal publication, and the outcome descriptor (e.g., mortality, hospitalization, transmission,  
46 immunogenicity, harms).  
47  
48  
49  
50  
51  
52  
53  
54  
55  
56  
57

1  
2  
3 For outcomes that were reported in both preprints and journal publications, , we collected data  
4 on components of outcome reporting based on recommendations for clinical study results  
5 reporting.[16,21] We recorded whether there were discrepancies between any components of  
6 outcome reporting between journal publications and preprints. We extracted the text relevant  
7 to each discrepancy:  
8  
9  
10

- 11 ● Measure (e.g., PCR test)
- 12 ● Metric (e.g., mean change from baseline, proportion of people)
- 13 ● Time point at which the assessment was made (e.g., 1 week after starting treatment).
- 14 ● Numerical values reported (e.g., effect estimate and measure of precision)
- 15 ● Statistical significance of result (as reported)
- 16 ● Type of statistical analysis (e.g., regression, chi-squared test)
- 17 ● Subgroup analyses (if any)
- 18 ● Whether outcome was identified as primary or secondary

### 30 Spin:

31 Studies have used a variety of methods to measure spin in randomized controlled trials and  
32 observational studies.[17] Based on our previously developed typology of spin derived from a  
33 systematic review of spin studies,[17] we developed and pretested a coding tool for spin that  
34 can be applied to both interventional and observational studies of treatment or prevention. In  
35 the context of research on treatment or prevention of COVID-19, the most meaningful  
36 consequences of spin are overinterpretation of efficacy and underestimation of harms.  
37 Therefore, our tool emphasizes these manifestations of spin. We searched the abstracts and  
38 full text of each preprint and journal publication for 3 primary categories of spin, and  
39 accompanying subcategories:  
40  
41  
42  
43  
44  
45  
46  
47  
48  
49

#### 50 1) Inappropriate interpretation given study design

- 51 ● Claiming causality in non-randomized studies
- 52 ● Interpreting a lack of statistical significance as equivalence

- 1
- 2
- 3 ● Interpreting a lack of statistical significance of harm measures as safety
- 4 ● Claim of any significant difference despite lack of statistical test
- 5 ● Other
- 6
- 7
- 8
- 9 2) Inappropriate extrapolations or recommendations
- 10 ● Suggestion that the intervention or exposure is more clinically relevant or useful than is
- 11 justified given the study design
- 12 ● Recommendation made to population groups / contexts outside of those investigated
- 13 ● (Observational) Expressing confidence in an intervention or exposure without
- 14 suggesting the need for further confirmatory studies
- 15 ● Other
- 16
- 17
- 18
- 19
- 20
- 21 3) Selectively focusing on positive results or more favorable data presentation
- 22 ● Discussing only significant (non-primary) results to distract from non-significant primary
- 23 results
- 24 ● Omitting non-significant results from abstract / discussion / conclusion
- 25 ● Claiming significant effects for non-significant results
- 26 ● Acknowledge statistically nonsignificant results from the primary outcome but
- 27 emphasize the beneficial effect of treatment
- 28 ● Describing non-significant results as “trending towards significance”
- 29 ● Mentioning adverse effects in the abstract / discussion /conclusion but minimizing their
- 30 potential effect or importance
- 31 ● Misleading description of study design as one that is more robust
- 32 ● Use of linguistic spin
- 33 ● Other
- 34
- 35
- 36
- 37
- 38
- 39
- 40
- 41
- 42
- 43
- 44
- 45
- 46

47 **Analysis:** We report the frequency and types of discrepancies in study characteristics and  
48 results reporting between preprints and journal publications. We report the proportion of  
49 preprints and journal publications with spin and the types of spin. We iteratively analyzed the  
50 text descriptions of discrepancies identified; we grouped descriptions into common categories,  
51  
52  
53  
54  
55  
56  
57



1  
2  
3 while still accounting for all instances of discrepant reporting, even if it only occurred once, to  
4 demonstrate the range of the phenomenon.  
5  
6  
7

8  
9 To determine whether preprints that were posted after an article received peer review  
10 influenced the number of discrepancies, we conducted a *post hoc* sensitivity analysis by  
11 removing 7 studies where the preprint was posted up to 7 days before the revision, acceptance,  
12 or publication dates of the journal publication.  
13  
14  
15

16  
17  
18 Our protocol modification, list of included preprints and journal publications, data dictionary  
19 and dataset are available in our OSF project linked to our protocol:

20 [https://osf.io/5ru8w/?view\\_only=fe509bf54c104354a1e12f011bdf66a](https://osf.io/5ru8w/?view_only=fe509bf54c104354a1e12f011bdf66a).  
21  
22  
23

24  
25 **Ethics approval:** This study analyzes publicly available information and is exempt from ethics  
26 review.  
27  
28

### 29 30 **Patient and Public Involvement**

31 No patient involvement.  
32  
33  
34  
35  
36  
37  
38  
39  
40  
41  
42  
43  
44  
45  
46  
47  
48  
49  
50  
51  
52  
53  
54  
55  
56  
57  
58  
59  
60

## **RESULTS**

**Study characteristics:** Of the 67 included studies, 57 were studies of treatment and management, 9 of prevention, and 1 of both. The preprints and journal publications were published between March 1, 2020 and October 30, 2020 with a mean time between preprint and journal publication of 65.4 days (range 0 to 271 days). The topics of the studies varied and included effects of clinical and public health interventions, associations of risk factors with COVID-19 symptoms, and ways to improve implementation of public health measures, such as social distancing. Almost a third of studies (21/67, 31%) were conducted in the United States, followed by Italy and Spain (n = 6, 9% each), and China (n = 5, 7%). The majority of studies reported public or non-profit funding sources (n=32, 49%) or that no funding was provided (n=24, 36%). Over half the studies also reported that the authors had no conflicts of interest (n=37, 53%).

**Discrepancies in study characteristics:** Table 1 shows discrepancies in study characteristics reported in preprints and journal publications. The Table shows whether each study characteristic was reported or not; if a study characteristic was reported in both the preprint and journal publications, discrepancies in content are described. More preprints than journal publications reported funding source, author conflicts of interest and ethics approval; more journal publications than preprints reported participant demographics and study limitations. In all categories, most discrepancies occurred in the content of items that were reported, rather than in whether the item was present or not. For example, journal publications contained additional information on funding sources, conflicts of interest, demographic characteristics, and limitations, as well as more tables and figures compared to preprints (Table 1).

**Results reporting:** Of the 67 studies, 23 (34%) had no discrepancies in results reporting between preprints and journal publications (Table 2). Twenty-three studies had outcomes that were missing from either the preprint or the journal publication. Fifteen (22%) studies had at least one outcome that was included in the journal publication, but not the preprint; 8 (12%)

1  
2  
3 had at least one outcome that was reported in the preprint only. The included studies had  
4 multiple outcomes. The majority of studies with missing reported outcomes (16/23, 70%) had  
5 one outcome missing from either the preprint or journal publication. However, two studies had  
6 5 outcomes missing from the journal publication, but reported in the preprint only.[22–25] As  
7 described in Table 2, these omissions included important clinical or harm outcomes. For  
8 example, one preprint omitted toxicity outcomes that were reported in the journal  
9 publication.[26,27]  
10  
11  
12  
13  
14  
15  
16  
17

18 Table 3 shows the types of discrepancies in components of results reporting. We report the  
19 number of studies that had at least one discrepancy and, because studies have multiple  
20 outcomes, the number of discrepancies across all outcomes in the 67 studies. The most  
21 frequent types of discrepancies between outcomes reported in both preprints and journal  
22 publications were in the numerical values reported, statistical tests performed, subgroup  
23 analyses conducted, statistical significance reported, and timepoint at which the outcome was  
24 assessed (Table 3). The types of discrepancies were variable, although journal publications  
25 consistently included additional statistical analyses and subgroup analyses compared to  
26 preprints. Journal publications more frequently reported outcomes measured over a longer  
27 time period than preprints.  
28  
29  
30  
31  
32  
33  
34  
35  
36  
37

38 **Spin:** At least one instance of spin occurred in the preprint, journal publication, or both in 30  
39 (45%) of the 67 studies. Spin occurred in both preprints and journal publications in 23 / 67  
40 (34%) studies, the preprint only in 5 (7%) studies, and the journal publications only in 2 (3%)  
41 studies (Table 4). Spin, in any category, was removed between the preprint and journal  
42 publication in 5 / 67(7%) studies; but added between the preprint and journal publication in 1  
43 (1%) study. .  
44  
45  
46  
47  
48  
49  
50

51 Table 4 shows the categories of spin that occurred in preprints and their accompanying journal  
52 publications. Thirteen of 67 (19%) studies had changes in the type of spin present in the  
53 preprint versus the journal publication; 8 (12%) studies had at least one additional type of spin  
54  
55  
56  
57

1  
2  
3 present in the preprint, 2 (3%) studies had at least one additional type of spin present in the  
4 journal publication. Inappropriate extrapolation or recommendations was the most frequently  
5 occurring type of spin in both preprints and journal publications (11/67, 16% of studies). This  
6 type of spin and inappropriate interpretation given the study design occurred more frequently  
7 in preprints than journal publications.  
8  
9  
10  
11  
12

13  
14 An example of inappropriate interpretation was found in both the preprint and journal  
15 publication for an open-label non-randomised trial: the study investigated the effect of  
16 hydroxychloroquine (and in combination with azithromycin) on SARS-Co-V-2 viral load. They  
17 found a statistically significant viral load reduction at day 6; however, despite the small sample  
18 size and non-randomised study design, they concluded that their findings were “so significant”  
19 and recommended that “COVID-19 patients be treated with hydroxychloroquine and  
20 azithromycin to cure their infection and to limit the transmission of the virus to other people in  
21 order to curb the spread of COVID-19 in the world.”[28,29] An example of inappropriate  
22 extrapolation or recommendations that occurred in both the preprint and journal publication is  
23 a study that recommended specific policy approaches that were not tested in the study: “The  
24 UK will shortly enter a new phase of the pandemic, in which extensive testing, contact tracing  
25 and isolation will be required to keep the spread of COVID-19. For this to succeed, adherence  
26 must be improved.”[30,31] This observational study aimed to identify factors associated with  
27 individuals’ adherence to self-isolation and lockdown measures; the authors did not aim to  
28 investigate public adherence to testing recommendations or contact tracing, nor test their  
29 efficacy.  
30  
31  
32  
33  
34  
35  
36  
37  
38  
39  
40  
41  
42  
43  
44

45 **Sensitivity analysis:** The mean time between preprint posting and journal article publication  
46 was 65.4 days (range 0 – 271) (Supplemental file, Table S1). No preprints were posted after the  
47 revision, acceptance or publication dates for the accompanying journal publication. One  
48 preprint was posted the same date as the publication date. Discrepancies in study  
49 characteristics, outcome reporting and spin changed minimally when the analyses were  
50 conducted after removing 7 studies where the preprint was posted up to 7 days before the  
51  
52  
53  
54  
55  
56  
57  
58  
59  
60

1  
2  
3 revision, acceptance, or publication dates of the journal publication (Supplemental file, Tables  
4 S2 – S4).  
5  
6  
7

## 8 **DISCUSSION**

9  
10  
11  
12 *Principal findings.* Discrepancies between results reporting in preprints and their accompanying  
13 journal publications were frequent, but most often consisted of differences in content rather  
14 than a complete lack of reporting. Although infrequent, some outcomes that were not  
15 reported would have provided information that is critical for clinical decision making, such as  
16 clinical or harm outcomes that appeared only in the journal publication. The finding that  
17 outcomes reported in journal publications were measured over a longer time frame than  
18 outcomes reported in preprints indicates that the preprints were being used to publish  
19 preliminary or interim data. Preliminary or interim findings should be clearly labeled in  
20 preprints.  
21  
22  
23  
24  
25  
26  
27  
28  
29

30  
31 Although almost half of the preprints and journal publications contained spin, there was no  
32 clear difference in the types of spin. Spin is an enduring problem in the medical literature.[17]  
33 Our findings suggest that the identification and prevention of spin during journal peer review  
34 and editorial processes needs further improvement.  
35  
36  
37  
38  
39

40 More preprints reported funding source, author conflicts of interest and ethics approval than  
41 journal publications. These differences may be due to the screening requirements of medRxiv,  
42 the main source of preprints in our sample. When reported in both, journal publications  
43 included more detailed information on funding source, conflicts of interest of authors, and  
44 demographics of the population studied. Journal publications also included more tables and  
45 figures, and more extensive discussion of limitations. Some of these differences may be due to  
46 more comprehensive reporting requirements of journals. Other changes, such as more  
47 information on the study population or greater discussion of limitations, may be due to  
48 requests for additional information during peer review.  
49  
50  
51  
52  
53  
54  
55  
56  
57

1  
2  
3  
4  
5 Since preprints are posted without peer review and most journal publications in our sample  
6 were likely to be peer reviewed because they were identified from PubMed, our study  
7 indirectly investigates the impact of peer review on research articles. Articles may not have  
8 been peer-reviewed in similar ways. Authors may have made changes in their papers that were  
9 independent of peer review. We observed instances where peer review appeared to improve  
10 clarity (e.g. more detail on measurements)[32,33] or interpretation (e.g. requirement to  
11 present risk differences rather than just n (%) per treatment group).[34,35] Empirical evidence  
12 on the impact of peer review on manuscript quality is scarce. A study comparing submitted and  
13 published manuscripts found that the number of changes was relatively small and, similar to  
14 our study, primarily involved adding or clarifying information.[13] Some of the changes  
15 requested by peer reviewers were classified as having a negative impact on reporting, such as  
16 the addition of post-hoc subgroup analyses, statistical analyses that were not prespecified, or  
17 optimistic conclusions that did not reflect the trial results. In our sample, additions of subgroup  
18 and statistical analyses were common between preprints and journal publications, although we  
19 did not determine their appropriateness.  
20  
21  
22  
23  
24  
25  
26  
27  
28  
29  
30  
31  
32  
33  
34

35 A small proportion of medRxiv preprints, 10% during the server's first year, were published as  
36 journal publications.[5] Therefore, our sample could be limited to studies that their authors  
37 deemed of high enough quality to be eligible for submission to a journal. Or, our sample could  
38 be limited to articles that had not been rejected by a journal. It is possible that peer review was  
39 eliminating publications that were fundamentally unsound, while more quickly processing  
40 studies that were sound and useful. Under non-pandemic conditions, articles may undergo  
41 more revision. For example, peer reviewers may not suggest changes they think are less  
42 important, or editors may accept articles when they would have normally requested minor or  
43 major revisions. Thus, in this situation, peer review may mainly be playing the role of  
44 determining whether a study should be published in a journal or not.  
45  
46  
47  
48  
49  
50  
51  
52  
53

54 There were minimal changes in the frequency and types of discrepancies between preprints  
55 and journal publications when we conducted a sensitivity analysis limiting our sample to studies  
56  
57

1  
2  
3 where the preprints were published before the revision or acceptance date of the journal  
4 publication. This suggests that our findings are robust even when the sample is limited to  
5 preprints that could not have benefited from peer review. Given this finding and the observed  
6 similarities between preprints and their subsequent journal publications, our results suggest  
7 that peer review during the accelerated pace of COVID-19 research publication may not have  
8 provided much added value. The urgency related to dissemination of COVID-19 research could  
9 have led journals to fast-track publication by abbreviating editorial or peer review processes,  
10 resulting in fewer differences between preprints and journal publications.  
11  
12  
13  
14  
15  
16  
17  
18  
19

20 *Comparison to other studies.* Our results are consistent with other studies finding small  
21 changes in reporting between preprints and journal publications. A number of these studies  
22 have been limited by failing to assess the addition or deletion of outcomes and by the use of  
23 composite “scores” that included items related to risk of bias and reporting. In contrast to our  
24 study, in a matched sample of preprints and journal publications, Carnerio et al. found journal  
25 publications more likely to have conflict of interest statement than preprints. In a textual  
26 analysis using 5 different algorithms, Klein et al. found very little difference in text between  
27 preprints and articles in a large matched sample.[9] We also noted preprints and journal  
28 publications that were almost identical, or had very minor differences such as corrections of  
29 typos. Other studies are limited by comparing unmatched samples of preprints and articles. In  
30 a comparison of 13 preprints and 16 articles on COVID-19 that were not reporting on the same  
31 studies, Kataoka et al. found no significant differences in risk of bias or spin in titles and  
32 conclusions.[11]  
33  
34  
35  
36  
37  
38  
39  
40  
41  
42  
43  
44

45 We found similar changes in numerical results to Oikonomidi et al. who compared 66 preprint-  
46 article pairs for COVID-19 studies and found 25 (38%) of studies had changes.[12] Oikonomidi  
47 classified 16 of these changes as “important” based on 1) an increase or decrease by  $\geq 10\%$  of  
48 the initial value in any effect estimate and/or 2) a change in the p-value crossing the threshold  
49 of 0.05, for any study outcome. We did not classify changes based on magnitude or threshold  
50 p-values because changes in numerical values may be related to other components of outcome  
51  
52  
53  
54  
55  
56  
57  
58  
59  
60

1  
2  
3 reporting that we observed, such as changes to follow-up times or the use of different  
4 statistical tests. Furthermore, deviations from a p-value of 0.05 do not necessarily indicate  
5 changes in scientific or clinical significance. We examined changes in multiple components of  
6 outcome reporting that are considered essential, not just the numerical value of the  
7 outcome.[16,21] The diversity of studies included in our sample would make any  
8 categorizations of scientific or clinical significance difficult and subjective. For example, studies  
9 were observational and experimental and not all studies conducted statistical analysis. The  
10 topics of the studies included tests of clinical and public health interventions, associations of  
11 risk factors with COVID-19 symptoms, and ways to improve implementation of public health  
12 measures, such as social distancing.  
13  
14  
15  
16  
17  
18  
19  
20  
21  
22

23 *Strengths and limitations of this study.* We selected studies from the Cochrane COVID-19  
24 Register rather than conducting a literature search. However, as the Cochrane COVID-19  
25 Register has been optimized to identify COVID-19 clinical research for systematic reviews, we  
26 feel the search was comprehensive for identifying COVID-19 studies related to treatment or  
27 prevention that are most likely to have an impact on clinical practice or health policy. As a  
28 study-based register, all records related to a study are identified, enabling us to obtain all  
29 preprint and journal publication versions for a single study. Second, we compared the first  
30 version of the preprint with the final journal publication. We may have identified a different  
31 number of discrepancies if we compared later versions of the preprint with the journal  
32 publication. Third, although clinically important, our focus on COVID-19 research may not be  
33 representative of other types of research published as preprints, then journal publications. This  
34 study should be replicated in a sample of non-COVID related interventional and observational  
35 clinical studies. Future research could also include assessment of outcome reporting  
36 components and spin in preprints that have not been published in journals. Fourth, although  
37 we compared non-peer-reviewed preprints to their accompanying journal publications, we did  
38 not directly assess the effects of peer review. Finally, coders were not blinded to the source or  
39 authors of preprints and journal publications as this was not feasible and there is no evidence  
40 that it would alter the decisions made.  
41  
42  
43  
44  
45  
46  
47  
48  
49  
50  
51  
52  
53  
54  
55  
56  
57  
58  
59  
60



## **CONCLUSIONS**

The COVID-19 preprints and their subsequent journal publications were largely similar in reporting of study characteristics, outcomes and spin in interpretation. However, given the urgent need for valid and reliable research on COVID-19 treatment and prevention, even a few important discrepancies could impact decision making. All COVID-19 studies, whether published as preprints or journal publications, should be critically evaluated for discrepancies in outcome reporting or spin, such as failure to report data on harms or overly optimistic conclusions.

Funding source: This study had no funding. Role of the funder: not applicable

Competing Interest Statement: All authors have completed the *Unified Competing Interest form* (available on request from the corresponding author) and declare: no support from any organisation for the submitted work; no financial relationships with any organisations that might have an interest in the submitted work in the previous three years. RF is a Cochrane employee and part of the development team for the Cochrane COVID-19 Study Register. No other authors declare any other relationships or activities that could appear to have influenced the submitted work.

Data access: LB had full access to all the data in the study and takes responsibility for the integrity of the data and the accuracy of the data analysis.

Author contributions: LB conceived the project. All authors made substantial contributions to design of the work, the acquisition of data, analysis, and interpretation of data for the work. LB drafted the paper and all authors revised it critically for important intellectual content. All authors have approved the final manuscript. LB serves as guarantor for all aspects of the work.

1  
2  
3  
4  
5 Transparency declaration: LB affirms that the manuscript is an honest, accurate, and  
6 transparent account of the study being reported; that no important aspects of the study have  
7 been omitted; and that any discrepancies from the study as planned have been explained.  
8  
9

10  
11  
12 Data sharing statement: Data from this study is available in OSF project file  
13 ([https://osf.io/5ru8w/?view\\_only=fe509bf54c104354a1e12f011bdff66a](https://osf.io/5ru8w/?view_only=fe509bf54c104354a1e12f011bdff66a)).  
14  
15

16  
17  
18  
19  
20  
21  
22  
23  
24  
25  
26  
27  
28  
29  
30  
31  
32  
33  
34  
35  
36  
37  
38  
39  
40  
41  
42  
43  
44  
45  
46  
47  
48  
49  
50  
51  
52  
53  
54  
55  
56  
57  
58  
59  
60

For peer review only

## REFERENCES

- 1 All that's fit to preprint. *Nat Biotechnol* 2020;**38**:507–507. doi:10.1038/s41587-020-0536-x
- 2 Flanagan A, Fontanarosa PB, Bauchner H. Preprints involving medical research: do the benefits outweigh the challenges? *JAMA* 2020;**324**:1840. doi:10.1001/jama.2020.20674
- 3 Jung YE (Grace), Sun Y, Schluger NW. Effect and reach of medical articles posted on preprint servers during the COVID-19 pandemic. *JAMA Intern Med* Published Online First: 9 November 2020. doi:10.1001/jamainternmed.2020.6629
- 4 Kirkham JJ, Penfold NC, Murphy F, *et al*. Systematic examination of preprint platforms for use in the medical and biomedical sciences setting. *BMJ Open* 2020;**10**:e041849. doi:10.1136/bmjopen-2020-041849
- 5 Krumholz HM, Bloom T, Sever R, *et al*. Submissions and downloads of preprints in the first year of medRxiv. *JAMA* 2020;**324**:1903–5. doi:10.1001/jama.2020.17529
- 6 Krumholz HM, Bloom T, Ross J. Preprints can fill a void in times of rapidly changing science. STAT. 2020. <https://www.statnews.com/2020/01/31/preprints-fill-void-rapidly-changing-science/> (accessed 17 Dec 2020).
- 7 Bloom T. Shepherding preprints through a pandemic. *BMJ* 2020;**371**:m4703. doi:10.1136/bmj.m4703
- 8 Carneiro CFD, Queiroz VGS, Moulin TC, *et al*. Comparing quality of reporting between preprints and peer-reviewed articles in the biomedical literature. *Res Integr Peer Rev* 2020;**5**:16. doi:10.1186/s41073-020-00101-3
- 9 Klein M, Broadwell P, Farb SE, *et al*. Comparing published scientific journal articles to their pre-print versions. In: *Proceedings of the 16th ACM/IEEE-CS on Joint Conference on Digital Libraries*. New York, NY, USA: : Association for Computing Machinery 2016. 153–62. doi:10.1145/2910896.2910909
- 10 Nicolalde B, Añazco D, Mushtaq M, *et al*. Citations and publication rate of preprints on pharmacological interventions for COVID-19: the good, the bad and, the ugly. Version 2. *Res Sq* Published Online First: 8 September 2020. doi:10.21203/rs.3.rs-34689/v2
- 11 Kataoka Y, Oide S, Ariie T, *et al*. COVID-19 randomized controlled trials in medRxiv and PubMed. *Eur J Intern Med* 2020;**81**:97–9. doi:10.1016/j.ejim.2020.09.019
- 12 Oikonomidi T, Boutron I, Pierre O, *et al*. Changes in evidence for studies assessing interventions for COVID-19 reported in preprints: meta-research study. *BMC Med* 2020;**18**:402. doi:10.1186/s12916-020-01880-8

- 1  
2  
3 13 Hopewell S, Collins GS, Boutron I, *et al.* Impact of peer review on reports of randomised  
4 trials published in open peer review journals: retrospective before and after study. *BMJ*  
5 2014;**349**:g4145. doi:10.1136/bmj.g4145  
6  
7  
8 14 Lazarus C, Haneef R, Ravaud P, *et al.* Peer reviewers identified spin in manuscripts of  
9 nonrandomized studies assessing therapeutic interventions, but their impact on spin in  
10 abstract conclusions was limited. *J Clin Epidemiol* 2016;**77**:44–51.  
11 doi:10.1016/j.jclinepi.2016.04.012  
12  
13  
14 15 Chan A-W, Hróbjartsson A, Haahr MT, *et al.* Empirical evidence for selective reporting of  
15 outcomes in randomized trials: comparison of protocols to published articles. *JAMA*  
16 2004;**291**:2457. doi:10.1001/jama.291.20.2457  
17  
18  
19 16 Mathieu S, Boutron I, Moher D, *et al.* Comparison of registered and published primary  
20 outcomes in randomized controlled trials. *JAMA* 2009;**302**:977–84.  
21 doi:10.1001/jama.2009.1242  
22  
23  
24 17 Chiu K, Grundy Q, Bero L. ‘Spin’ in published biomedical literature: A methodological  
25 systematic review. *PLoS Biol* 2017;**15**:e2002173. doi:10.1371/journal.pbio.2002173  
26  
27  
28 18 Boutron I, Ravaud P. Misrepresentation and distortion of research in biomedical literature.  
29 *Proc Natl Acad Sci* 2018;**115**:2613–9. doi:10.1073/pnas.1710755115  
30  
31  
32 19 Bero L, Lawrence R, Leslie L, *et al.* Comparison of preprints with peer-reviewed publications  
33 on COVID-19: discrepancies in results reporting and conclusions. 2020.<https://osf.io/j62eu>  
(accessed 17 Dec 2020).  
34  
35  
36 20 Harris PA, Taylor R, Thielke R, *et al.* Research electronic data capture (REDCap): a metadata-  
37 driven methodology and workflow process for providing translational research informatics  
38 support. *J Biomed Inform* 2009;**42**:377–81. doi:10.1016/j.jbi.2008.08.010  
39  
40  
41 21 Zarin DA, Tse T, Williams RJ, *et al.* The ClinicalTrials.gov Results Database: update and key  
42 Issues. *N Engl J Med* 2011;**364**:852–60. doi:10.1056/NEJMsa1012065  
43  
44  
45 22 Borba MGS, Val FFA, Sampaio VS, *et al.* Effect of High vs Low Doses of Chloroquine  
46 Diphosphate as Adjunctive Therapy for Patients Hospitalized With Severe Acute Respiratory  
47 Syndrome Coronavirus 2 (SARS-CoV-2) Infection: A Randomized Clinical Trial. *JAMA Netw*  
48 *Open* 2020;**3**:e208857. doi:10.1001/jamanetworkopen.2020.8857  
49  
50  
51 23 Borba MGS, Val FFA, Sampaio VS, *et al.* Chloroquine diphosphate in two different dosages  
52 as adjunctive therapy of hospitalized patients with severe respiratory syndrome in the  
53 context of coronavirus (SARS-CoV-2) infection: Preliminary safety results of a randomized,  
54 double-blinded, phase IIb clinical trial (CloroCovid-19 Study). Version 1. *MedRxiv Prepr*  
55 2020;:2020.04.07.20056424. doi:10.1101/2020.04.07.20056424  
56  
57  
58  
59  
60

- 1  
2  
3 24 Tang W, Cao Z, Han M, *et al.* Hydroxychloroquine in patients with COVID-19: an open-label,  
4 randomized, controlled trial. Version 1. *MedRxiv Prepr* 2020;:2020.04.10.20060558.  
5 doi:10.1101/2020.04.10.20060558  
6  
7  
8 25 Tang W, Cao Z, Han M, *et al.* Hydroxychloroquine in patients with mainly mild to moderate  
9 coronavirus disease 2019: open label, randomised controlled trial. *BMJ* 2020;**369**:m1849.  
10 doi:10.1136/bmj.m1849  
11  
12 26 Weber AG, Chau AS, Egeblad M, *et al.* Nebulized in-line endotracheal dornase alfa and  
13 albuterol administered to mechanically ventilated COVID-19 patients: a case series.  
14 *MedRxiv Prepr* Published Online First: 15 May 2020. doi:10.1101/2020.05.13.20087734  
15  
16  
17 27 Weber AG, Chau AS, Egeblad M, *et al.* Nebulized in-line endotracheal dornase alfa and  
18 albuterol administered to mechanically ventilated COVID-19 patients: a case series. *Mol*  
19 *Med* 2020;**26**:91. doi:10.1186/s10020-020-00215-w  
20  
21  
22 28 Gautret P, Lagier J-C, Parola P, *et al.* Hydroxychloroquine and azithromycin as a treatment  
23 of COVID-19: results of an open-label non-randomized clinical trial. *medRxiv*  
24 2020;:2020.03.16.20037135. doi:10.1101/2020.03.16.20037135  
25  
26  
27 29 Gautret P, Lagier J-C, Parola P, *et al.* Hydroxychloroquine and azithromycin as a treatment  
28 of COVID-19: results of an open-label non-randomized clinical trial. *Int J Antimicrob Agents*  
29 2020;**56**:105949. doi:10.1016/j.ijantimicag.2020.105949  
30  
31  
32 30 Smith LE, Amlôt R, Lambert H, *et al.* Factors associated with adherence to self-isolation and  
33 lockdown measures in the UK; a cross-sectional survey. *MedRxiv Prepr*  
34 2020;:2020.06.01.20119040. doi:10.1101/2020.06.01.20119040  
35  
36  
37 31 Smith LE, Amlôt R, Lambert H, *et al.* Factors associated with adherence to self-isolation and  
38 lockdown measures in the UK: a cross-sectional survey. *Public Health* 2020;**187**:41–52.  
39 doi:10.1016/j.puhe.2020.07.024  
40  
41  
42 32 Chorin E, Wadhvani L, Magnani S, *et al.* QT interval prolongation and torsade de pointes in  
43 patients with COVID-19 treated with hydroxychloroquine/azithromycin. *Heart Rhythm*  
44 2020;**17**:1425–33. doi:10.1016/j.hrthm.2020.05.014  
45  
46  
47 33 Chorin E, Wadhvani L, Magnani S, *et al.* QT Interval Prolongation and Torsade De Pointes in  
48 Patients with COVID-19 treated with Hydroxychloroquine/Azithromycin. *MedRxiv Prepr*  
49 2020;:2020.04.27.20074583. doi:10.1101/2020.04.27.20074583  
50  
51  
52 34 Agarwal A, Mukherjee A, Kumar G, *et al.* Convalescent plasma in the management of  
53 moderate COVID-19 in India: an open-label parallel-arm phase II multicentre randomized  
54 controlled trial (PLACID Trial). Version 1. *MedRxiv Prepr* 2020;:2020.09.03.20187252.  
55 doi:10.1101/2020.09.03.20187252  
56  
57  
58  
59  
60

- 1  
2  
3 35 Agarwal A, Mukherjee A, Kumar G, *et al.* Convalescent plasma in the management of  
4 moderate covid-19 in adults in India: open label phase II multicentre randomised controlled  
5 trial (PLACID Trial). *BMJ* 2020;**371**:m3939. doi:10.1136/bmj.m3939  
6  
7  
8  
9  
10  
11  
12  
13  
14  
15  
16  
17  
18  
19  
20  
21  
22  
23  
24  
25  
26  
27  
28  
29  
30  
31  
32  
33  
34  
35  
36  
37  
38  
39  
40  
41  
42  
43  
44  
45  
46  
47  
48  
49  
50  
51  
52  
53  
54  
55  
56  
57  
58  
59  
60

For peer review only

**Table 1:** Discrepancies in Study Characteristics (n = 67 studies)

| Characteristic                  | No Discrepancies                                                  |                                                                     | Discrepancies                            |                                                      |                                                                                                                                                                                                                                                                                                                                                      |
|---------------------------------|-------------------------------------------------------------------|---------------------------------------------------------------------|------------------------------------------|------------------------------------------------------|------------------------------------------------------------------------------------------------------------------------------------------------------------------------------------------------------------------------------------------------------------------------------------------------------------------------------------------------------|
|                                 | Characteristics reported in both preprint and journal publication | Characteristics reported in neither preprint or journal publication | Characteristic reported in preprint only | Characteristics reported in journal publication only | Characteristic reported in both preprint and journal publication, but with discrepancies in content<br><br>Examples of discrepancies <sup>1</sup>                                                                                                                                                                                                    |
| <b>Title</b>                    | 47 (70%)                                                          | 0 (0%)                                                              | 0 (0%)                                   | 0 (0%)                                               | 20 (30%) <ul style="list-style-type: none"> <li>• Preprint includes study design in the title (n=4)</li> <li>• Journal publication includes study design in the title (n=5)</li> <li>• Change in study design description (n=5)</li> <li>• Change in population description (n=3)</li> <li>• Change in location description in both (n=3)</li> </ul> |
| <b>Authors</b>                  | 49 (73 %)                                                         | 0 (0%)                                                              | 0 (0%)                                   | 0 (0%)                                               | 18 (27%) <ul style="list-style-type: none"> <li>• Additional author(s) in preprint (n = 3)</li> <li>• Additional author(s) in journal publication (n = 9)</li> <li>• Change in author order (n = 6)</li> <li>• Change in spelling, wording, or order of author first/last names (n= 2)</li> </ul>                                                    |
| <b>Disclosed Funding source</b> | 44 (66%)                                                          | 3 (4%)                                                              | 8 (12%)                                  | 2 (3%)                                               | 10 (15%) <ul style="list-style-type: none"> <li>• Additional funding sources in journal publication (n = 4)</li> </ul>                                                                                                                                                                                                                               |

|                                                  |          |         |        |        |                                                                                                                                                                                                                                                                                                                                                                                                                                                                              |
|--------------------------------------------------|----------|---------|--------|--------|------------------------------------------------------------------------------------------------------------------------------------------------------------------------------------------------------------------------------------------------------------------------------------------------------------------------------------------------------------------------------------------------------------------------------------------------------------------------------|
|                                                  |          |         |        |        | <ul style="list-style-type: none"> <li>Funding statement in preprint provides more detailed (n = 1)</li> <li>Funding statement in journal publication more detailed (n = 2)</li> </ul>                                                                                                                                                                                                                                                                                       |
| <b>Conflict of Interest Disclosure statement</b> | 50 (75%) | 1 (1%)  | 5 (8%) | 1 (1%) | <b>10 (15%)</b> <ul style="list-style-type: none"> <li><b>Additional conflicts reported in journal publication (n = 8)</b></li> <li><b>Additional conflicts reported in preprint (n = 1)</b></li> <li><b>Additional detail included in journal publication (n = 2)</b></li> </ul>                                                                                                                                                                                            |
| <b>Ethics approval</b>                           | 59 (88%) | 3 (5%)  | 1 (1%) | 0 (0%) | 4 (6%) <ul style="list-style-type: none"> <li>preprint contains approval number but journal publication does not (N=1); preprint states approval was waived and journal publication states it was not needed (n=1); preprint contains no information on ethics approval, while journal publication describes the approvals (n = 1); preprints state consent was approved prior to sample collection while article states it was approved from next of kin (n = 1)</li> </ul> |
| <b>Location of study</b>                         | 63 (94%) | 4 (6 %) | 0 (0%) | 0 (0%) | 0 (0%)                                                                                                                                                                                                                                                                                                                                                                                                                                                                       |
| <b>Number of participants</b>                    | 61 (91%) | 0 (0%)  | 0 (0%) | 0 (0%) | 6 (9%) <ul style="list-style-type: none"> <li>Journal publication has larger analytic</li> </ul>                                                                                                                                                                                                                                                                                                                                                                             |



|                                 |          |        |        |        |                                                                                                                                                                                                                                                                                                                                                                                            |
|---------------------------------|----------|--------|--------|--------|--------------------------------------------------------------------------------------------------------------------------------------------------------------------------------------------------------------------------------------------------------------------------------------------------------------------------------------------------------------------------------------------|
|                                 |          |        |        |        | sample size than preprint (n = 2); Journal publication has smaller analytic sample size than preprint (n=1); different numbers of patients recruited, but same number randomized; 284 patients included in preprint, 267 in journal publication (n = 1); number do not match for any sampling or analysis (n = 1); typographical error (n = 1)                                             |
| <b>Participant demographics</b> | 38 (58%) | 3 (4%) | 0 (0%) | 1 (1%) | 25 (37%) <ul style="list-style-type: none"> <li>Journal publication includes additional demographic categories (n=10)</li> <li>Preprint includes additional demographic categories (n = 4)</li> <li>Preprint and journal publication report different values for the same demographic characteristics (n = 11)</li> <li>Demographic data report using different metrics (n = 6)</li> </ul> |
| <b>Tables and Figures</b>       | 18 (27%) | 0 (0%) | 0 (0%) | 0 (0%) | 49 (73%) <ul style="list-style-type: none"> <li>Journal publication includes additional tables/figures (n=25)</li> <li>Preprint includes additional tables/figures (n=10)</li> </ul>                                                                                                                                                                                                       |

|                                  |          |         |        |        |                                                                                                                                                                                                                                                                                                                                                                             |
|----------------------------------|----------|---------|--------|--------|-----------------------------------------------------------------------------------------------------------------------------------------------------------------------------------------------------------------------------------------------------------------------------------------------------------------------------------------------------------------------------|
|                                  |          |         |        |        | <ul style="list-style-type: none"> <li>• Additional data in journal publication tables (n = 14)</li> <li>• Additional data in preprint tables/figures (n = 6)</li> <li>• Change in order of tables/figures (n = 4)</li> <li>• Change in metrics (eg. mean vs. median) (n = 15)</li> <li>• Change in labels (n = 5)</li> <li>• Numbers reported differed (n = 16)</li> </ul> |
| <b>Discussion of limitations</b> | 27 (40%) | 7 (11%) | 0 (0%) | 2 (3%) | 31 (46%) <ul style="list-style-type: none"> <li>• More limitations listed in journal publication than preprint (n=28)</li> <li>• More limitations listed in preprint than journal publication (n=1)</li> </ul>                                                                                                                                                              |

<sup>1</sup> Ns do not add to number of discrepancies between preprints and journal publications as some studies could have more than one discrepancy and not all discrepancies have been included as examples.

**Table 2:** Discrepancies in Number of Outcomes Reported (N= 67 studies)

| Type of Discrepancy                                 | Number (%) of studies with at least 1 outcome that was reported only in the preprint or journal publication (n=67) | Number and description of outcomes across all studies that were reported only in the preprint or journal publication                                                                                                                                                                                                                                                                                                                                                                                                                                                                                                                                                                                                                                                               |
|-----------------------------------------------------|--------------------------------------------------------------------------------------------------------------------|------------------------------------------------------------------------------------------------------------------------------------------------------------------------------------------------------------------------------------------------------------------------------------------------------------------------------------------------------------------------------------------------------------------------------------------------------------------------------------------------------------------------------------------------------------------------------------------------------------------------------------------------------------------------------------------------------------------------------------------------------------------------------------|
| <b>Outcome reported in journal publication only</b> | 15 (22%)                                                                                                           | N = 19<br>1) Treatment-associated toxicities<br>2) Adverse reactions<br>3) Survival at ICU discharge<br>4) Creatine phosphokinase<br>5) Radiographic scale for acute respiratory distress syndrome<br>6) Time to negative swab<br>7) Time to RT-PCR negativity<br>8) Clinical outcomes at discharge<br>9) Ventilator status of those remaining hospitalized at end of follow up<br>10) Secondary composite - cardiovascular complications<br>11) Acute renal failure<br>12) Creatinine phosphokinase<br>13) Sequential organ failure assessment score<br>14) Length of stay<br>15) WHO Clinical Progression Scale<br>16) sCD14 levels related to corticoid treatment<br>17) Hospital Stay<br>18) Onset of symptoms<br>19) Mechanical ventilation or all-cause mortality at 21 days |
| <b>Outcome reported in preprint only</b>            | 8 (12%)                                                                                                            | N = 17<br>1) Oxygen support need<br>2) Invasive mechanical ventilation need<br>3) ICU need<br>4) Need for inotropics<br>5) Naso/oropharyngeal swab viral clearance<br>6) Final lymphocyte (cell/mm <sup>3</sup> )<br>7) Final CRP (mg/L)<br>8) Negative conversion of SARS-CoV-2 by 28 days                                                                                                                                                                                                                                                                                                                                                                                                                                                                                        |

|  |  |                                                                                                                                                                                                                                                                                                                                                                                                                                                                                                              |
|--|--|--------------------------------------------------------------------------------------------------------------------------------------------------------------------------------------------------------------------------------------------------------------------------------------------------------------------------------------------------------------------------------------------------------------------------------------------------------------------------------------------------------------|
|  |  | <p>9) Negative conversion rate at 4-, 7-, 10-, 14- or 21-day</p> <p>10) Changes of CRP values and blood lymphocyte count</p> <p>11) Rate of symptoms alleviation within 28-day</p> <p>12) Safety endpoints</p> <p>13) QTc <math>\geq</math> 470 ms</p> <p>14) Cumulative virus clearance rate vs different antiviral regimes in [a] all patients and [b] patients with moderate illness</p> <p>15) Adverse events</p> <p>16) Composite cardiovascular and renal failure</p> <p>17) Nosocomial infections</p> |
|--|--|--------------------------------------------------------------------------------------------------------------------------------------------------------------------------------------------------------------------------------------------------------------------------------------------------------------------------------------------------------------------------------------------------------------------------------------------------------------------------------------------------------------|

For peer review only

**Table 3:** Discrepancies in Components of Results Reporting for Outcomes Reported in Both Preprints and Journal Publications (N= 67 studies; 258 outcomes)

| Type of Discrepancy                  | Number (%) of studies with at least 1 discrepancy between the preprint and journal publication (n=67) | Number (%) of outcomes across all studies that were discrepant between the preprint and journal publication (n=258) | Descriptive Examples <sup>1</sup>                                                                                                                                                                                                                                                                                                                                        |
|--------------------------------------|-------------------------------------------------------------------------------------------------------|---------------------------------------------------------------------------------------------------------------------|--------------------------------------------------------------------------------------------------------------------------------------------------------------------------------------------------------------------------------------------------------------------------------------------------------------------------------------------------------------------------|
| <b>Outcome measurement</b>           | 6 (9%)                                                                                                | 8 (3%)                                                                                                              | <ul style="list-style-type: none"> <li>- Journal publication contains more detail on how outcome was measured compared to preprint (n=3)</li> <li>- Journal publication reports an additional or different measurement than the one used for the same outcome in the preprint (e.g., preprint reports 4 adverse events, journal publication reports 12) (n=4)</li> </ul> |
| <b>Units of measurement</b>          | 3 (4%)                                                                                                | 3 (1%)                                                                                                              | <ul style="list-style-type: none"> <li>- e.g., journal publication reports events, total and percentage for mortality, preprint reports only percentage; median (IQR) reported in journal publication, mean (SD) in preprint</li> </ul>                                                                                                                                  |
| <b>Timepoint assessment was made</b> | 10 (15%)                                                                                              | 24 (9%)                                                                                                             | <ul style="list-style-type: none"> <li>- Journal publication reports outcomes measured over a longer timepoint than preprint (n=13)</li> <li>- Journal publication reports additional interim time points compared to preprint (n=3)</li> </ul>                                                                                                                          |
| <b>Numerical values reported</b>     | 24 (36%)                                                                                              | 52 (20%)                                                                                                            | <ul style="list-style-type: none"> <li>- Differences in number of events or measurement values reported (n=17)</li> <li>- Differences in numbers of participants or denominators (n = 5)</li> <li>-</li> <li>-More adverse events reported in journal publication than preprint (n = 4)</li> </ul>                                                                       |

|                                                                  |          |          |                                                                                                                                                                                                                                                                                                                                                                                         |
|------------------------------------------------------------------|----------|----------|-----------------------------------------------------------------------------------------------------------------------------------------------------------------------------------------------------------------------------------------------------------------------------------------------------------------------------------------------------------------------------------------|
| <b>Finding of statistical significance</b>                       | 11 (16%) | 16 (6%)  | <ul style="list-style-type: none"> <li>- Different p-value reported with no change in significance (n=3)</li> <li>- Different p-value reported with change in significance; significant result reported in journal publication (n=1)</li> <li>- In multivariate models, journal publication and preprint report different variables as being statistically significant (n=2)</li> </ul> |
| <b>Statistical tests performed</b>                               | 17 (25%) | 31 (12%) | <ul style="list-style-type: none"> <li>- Journal publication contains additional statistical analysis compared to preprint (n=7)</li> <li>- Journal publication uses different statistical adjustments compared to preprint (n=7)</li> <li>- Journal publication and preprint use different statistical tests for same data (n=3)</li> </ul>                                            |
| <b>Subgroup analyses conducted</b>                               | 14 (21%) | 24 (9%)  | <ul style="list-style-type: none"> <li>- Journal publication includes subgroup analysis not included in preprint (n=6)</li> <li>- Journal publication finds statistically significant interaction for subgroup, preprint does not (n=1)</li> </ul>                                                                                                                                      |
| <b>Identifying the outcome as a primary or secondary outcome</b> | 1 (1%)   | 3 (1%)   | <ul style="list-style-type: none"> <li>- e.g., preprint identifies the primary endpoint as safety; journal publication adds the secondary endpoint of exploration of efficacy</li> </ul>                                                                                                                                                                                                |

<sup>1</sup> Ns do not add to number of reported discrepancies as some studies could have more than one discrepancy and not all discrepancies have been included as examples.

Table 4: Categories of Spin in Preprints and Journal Publications (n = 67 studies)

| Spin Categories and Subcategories <sup>1</sup>                                                                                        | No Spin<br>N (%) | Occurred in<br>preprint and journal<br>publication<br>N (%) | Occurred in<br>preprint only<br>N (%) | Occurred in<br>journal<br>publication only<br>N (%) |
|---------------------------------------------------------------------------------------------------------------------------------------|------------------|-------------------------------------------------------------|---------------------------------------|-----------------------------------------------------|
| <b>Any Category of Spin<sup>2</sup></b>                                                                                               | <b>37 (55%)</b>  | <b>23 (34%)</b>                                             | <b>5 (7%)</b>                         | <b>2 (3%)</b>                                       |
| <b>Category</b>                                                                                                                       |                  |                                                             |                                       |                                                     |
| <b>Inappropriate interpretation<br/>given study design<sup>3</sup></b>                                                                | <b>55 (82%)</b>  | <b>7 (10%)</b>                                              | <b>4 (6%)</b>                         | <b>1 (1%)</b>                                       |
| Subcategory                                                                                                                           |                  |                                                             |                                       |                                                     |
| Claiming causality in non-<br>randomized studies                                                                                      | 62 (93%)         | 4 (6%)                                                      | 1 (1%)                                | 0 (0%)                                              |
| Interpreting a lack of statistical<br>significance as equivalence                                                                     | 66 (99%)         | 0 (0%)                                                      | 0 (0%)                                | 1 (1%)                                              |
| Interpreting a lack of statistical<br>significance of harm measures<br>as safety                                                      | 65 (97%)         | 1 (1.5%)                                                    | 0 (0%)                                | 1 (1.5%)                                            |
| Claim of any significant<br>difference despite lack of<br>statistical test                                                            | 67 (100%)        | 0 (0%)                                                      | 0 (0%)                                | 0 (0%)                                              |
| Other                                                                                                                                 | 61 (91%)         | 2 (3%)                                                      | 4 (6%)                                | 0 (0%)                                              |
|                                                                                                                                       |                  |                                                             |                                       |                                                     |
| <b>Inappropriate extrapolations<br/>or recommendations</b>                                                                            | <b>52 (78%)</b>  | <b>13 (19%)</b>                                             | <b>2 (3%)</b>                         | <b>0 (0%)</b>                                       |
| Subcategory                                                                                                                           |                  |                                                             |                                       |                                                     |
| Suggestion that the treatment<br>or test is more clinically<br>relevant or useful than is<br>justified given the study design.        | 60 (90%)         | 6 (9%)                                                      | 1 (1%)                                | 0(0%)                                               |
| Recommendations made to<br>population groups / contexts<br>outside of those investigated.                                             | 63 (94%)         | 3 (5%)                                                      | 1 (1%)                                | 0 (0%)                                              |
| (Observational) Expressing<br>confidence in a treatment or<br>test without suggesting the<br>need for further confirmatory<br>studies | 66 (99%)         | 0 (0%)                                                      | 1 (1%)                                | 0 (0%)                                              |
| (Observational) Making<br>recommendations without<br>stating an RCT should be done<br>to validate the<br>recommendation               | 65 (97%)         | 2 (3%)                                                      | 0 (0%)                                | 0 (0%)                                              |
| Other                                                                                                                                 | 63 (94%)         | 3 (5%)                                                      | 1 (1%)                                | 0 (0%)                                              |
|                                                                                                                                       |                  |                                                             |                                       |                                                     |

| <b>Selective focusing on positive results or more favorable data presentation</b>                                         | <b>54 (81%)</b> | <b>8 (12%)</b> | <b>2 (3%)</b> | <b>3 (4%)</b> |
|---------------------------------------------------------------------------------------------------------------------------|-----------------|----------------|---------------|---------------|
| Subcategory                                                                                                               |                 |                |               |               |
| Discussing only significant (non-primary) results to distract from non-significant (primary results)                      | 66 (99%)        | 0 (0%)         | 1 (1%)        | 0 (0%)        |
| Omitting non-significant results from Abstract/Discussion/Conclusion                                                      | 65 (97%)        | 1 (1.5%)       | 0 (0%)        | 1 (1.5%)      |
| Claiming significant effects for non-significant results                                                                  | 67 (100%)       | 0 (0%)         | 0 (0%)        | 0 (0%)        |
| Acknowledge statistically nonsignificant results for the primary outcome but emphasize the beneficial effect of treatment | 66 (99%)        | 1 (1%)         | 0 (0%)        | 0 (0%)        |
| Describing non-significant results as "trending towards significance"                                                     | 66 (99%)        | 1 (1%)         | 0 (0%)        | 0 (0%)        |
| Mentioning adverse events in the abstract/discussion/conclusion but minimizing their potential effect or importance.      | 64 (96%)        | 2 (3%)         | 1 (1%)        | 0 (0%)        |
| Misleading description of study design as one that is more robust                                                         | 67 (100%)       | 0 (0%)         | 0 (0%)        | 0 (0%)        |
| No considerations of the limitations of the study                                                                         | 64 (96%)        | 3 (4%)         | 0 (0%)        | 0 (0%)        |
| Use of linguistic spin                                                                                                    | 66 (99%)        | 0 (0%)         | 0 (0%)        | 1 (1%)        |
| Other                                                                                                                     | 62 (93%)        | 1 (1%)         | 2 (3%)        | 2 (3%)        |

<sup>1</sup> Subcategories of spin are not mutually exclusive; a preprint or journal publications could contain multiple subcategories of spin within a category. Preprints and journal publications could contain different subcategories of spin within a category.

<sup>2</sup> This row shows counts of at least one instance of spin in any category. Column category and subcategory counts add to greater than any occurrence of spin because multiple categories and subcategories of spin could occur within a preprint or article publication. Row percents do not add to 100 due to rounding.

<sup>3</sup> Row percents may not add to 100 due to rounding



1  
2  
3  
4  
5  
6  
7  
8  
9  
10  
11  
12  
13  
14  
15  
16  
17  
18  
19  
20  
21  
22  
23  
24  
25  
26  
27  
28  
29  
30  
31  
32  
33  
34  
35  
36  
37  
38  
39  
40  
41  
42  
43  
44  
45  
46  
47  
48  
49  
50  
51  
52  
53  
54  
55  
56  
57  
58  
59  
60

**Figure legend:**

**Figure 1. Flowchart of study inclusion**

For peer review only

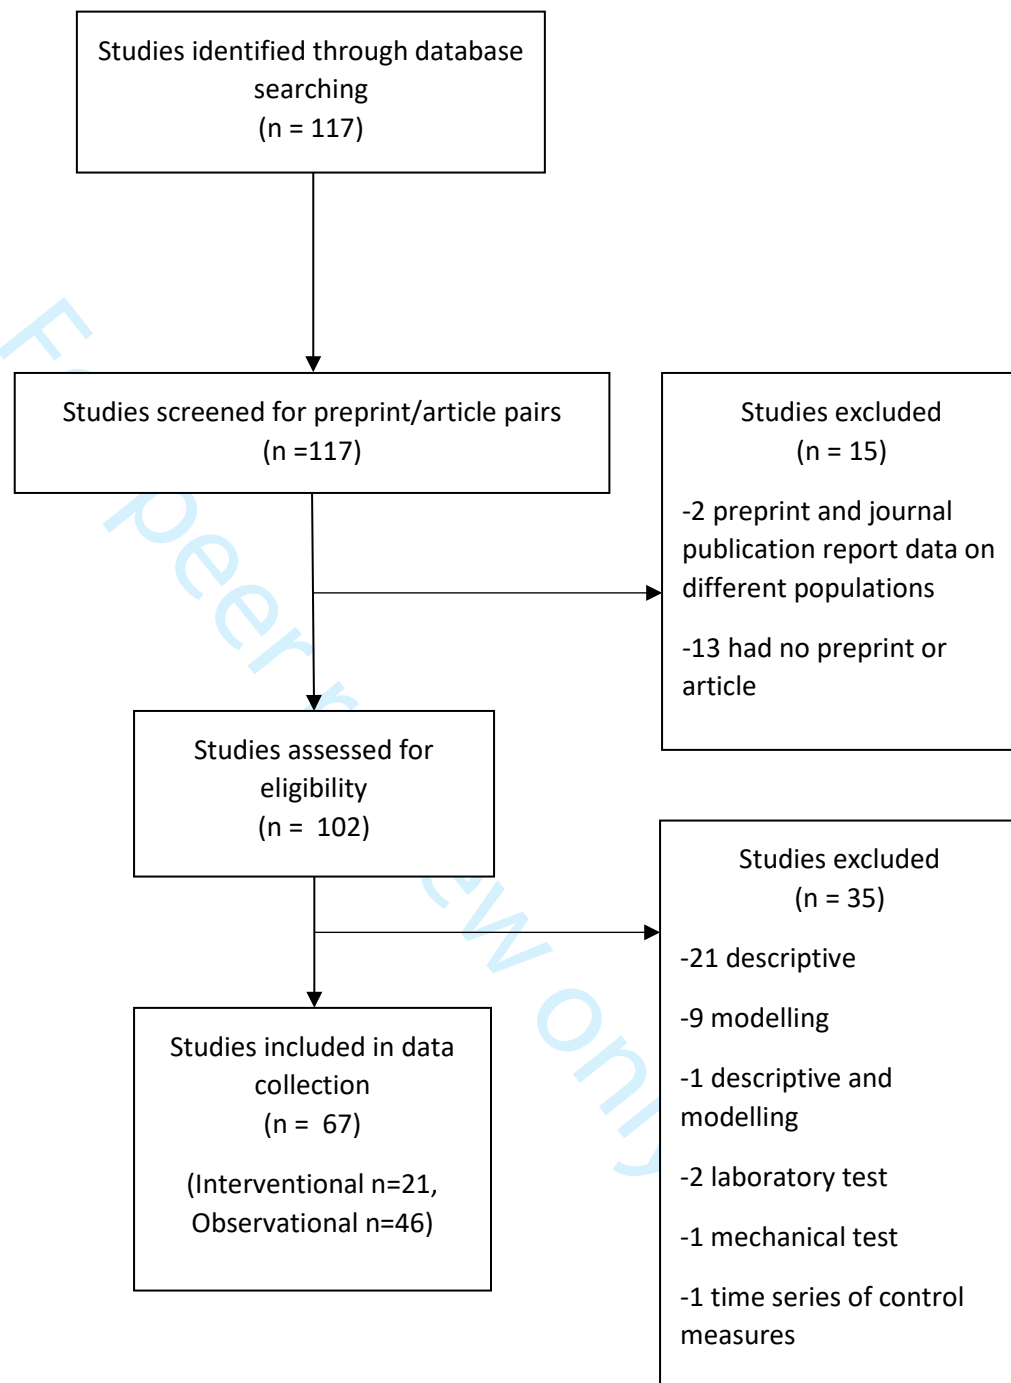

**Supplemental Files**

**Table S1: Timing of preprint to journal publication (days)**

**Table S2: Sensitivity Analysis of Discrepancies in Study Characteristics**

**Table S3: Sensitivity Analysis of Discrepancies in Outcome Reporting**

**Table S4: Sensitivity Analysis of Categories of Spin in Preprints and Journal Publications**

For peer review only

**Table S1: Timing of preprint to journal publication (days)**

|                                                                      | <b>Days from preprint to published, mean (range)</b> |
|----------------------------------------------------------------------|------------------------------------------------------|
| <b>All Studies (n=67)</b>                                            | 65.4 (0 - 271)                                       |
| <b>Subgroup: Preprint posted before submission to journal (n=32)</b> | 87.1 (10 - 271)                                      |
| <b>Subgroup: Preprint posted after submission to journal (n=27)</b>  | 52.2 (0 - 120)                                       |

**Table S2: Sensitivity Analysis of Discrepancies in Study Characteristics (n=60) <sup>a</sup>**

|                                  | No Discrepancies          |                              | Discrepancies                                |                                    |                                               |
|----------------------------------|---------------------------|------------------------------|----------------------------------------------|------------------------------------|-----------------------------------------------|
|                                  | Reported in Both, No. (%) | Reported in Neither, No. (%) | Reported in Both With Discrepancies, No. (%) | Reported in Preprint Only, No. (%) | Reported in Journal Publication Only, No. (%) |
| <b>Title</b>                     | 44 (73)                   | 0 (0)                        | 16 (27)                                      | 0 (0)                              | 0 (0)                                         |
| <b>Authors</b>                   | 43 (72)                   | 0 (0)                        | 17 (28)                                      | 0 (0)                              | 0 (0)                                         |
| <b>Disclosed Funding Source</b>  | 39 (65)                   | 3 (5)                        | 10 (17)                                      | 6 (10)                             | 2 (3)                                         |
| <b>COI Disclosure Statement</b>  | 45 (75)                   | 1 (2)                        | 9 (15)                                       | 4 (7)                              | 1 (2)                                         |
| <b>Ethics Approval</b>           | 54 (90)                   | 2 (3)                        | 4 (7)                                        | 0 (0)                              | 0 (0)                                         |
| <b>Location of Study</b>         | 56 (93)                   | 4 (7)                        | 0 (0)                                        | 0 (0)                              | 0 (0)                                         |
| <b>Number of Participants</b>    | 54 (90)                   | 0 (0)                        | 6 (10)                                       | 0 (0)                              | 0 (0)                                         |
| <b>Participant Demographics</b>  | 34 (57)                   | 3 (5)                        | 22 (37)                                      | 0 (0)                              | 1 (2)                                         |
| <b>Tables and Figures</b>        | 15 (25)                   | 0 (0)                        | 45 (75)                                      | 0 (0)                              | 0 (0)                                         |
| <b>Discussion of Limitations</b> | 23 (38)                   | 6 (10)                       | 30 (50)                                      | 0 (0)                              | 1 (2)                                         |

<sup>a</sup> Studies that had a preprint posted on-or-after the date of revision, acceptance, or publication were removed. This removed 1 study. Due to differences in journal reporting of these dates, there was overlap in those studies and no comparison in others. Therefore, we expanded the studies removed to include those with preprints posted 1-7 days before the date of revision, acceptance, or publication, thus removing 7 studies from the sensitivity analysis.

**Table S3: Sensitivity Analysis of Discrepancies in Outcome Reporting (n=60)<sup>a</sup>**

|                                                                  | <b>Number (%) of studies with at least 1 discrepancy<br/>n=60</b> | <b>Number (%) of Outcomes<br/>n=242</b> |
|------------------------------------------------------------------|-------------------------------------------------------------------|-----------------------------------------|
| <b>Outcome in journal publication only</b>                       | 14 (23)                                                           | 18 (7)                                  |
| <b>Outcome in preprint only</b>                                  | 7 (12)                                                            | 16 (7)                                  |
| <b>Outcome measurement</b>                                       | 5 (8)                                                             | 7 (3)                                   |
| <b>Units of measurement</b>                                      | 3 (5)                                                             | 3 (1)                                   |
| <b>Timepoint assessment was made</b>                             | 10 (17)                                                           | 24 (10)                                 |
| <b>Numerical values reported</b>                                 | 23 (38)                                                           | 49 (20)                                 |
| <b>Finding of statistical significance</b>                       | 11 (18)                                                           | 16 (7)                                  |
| <b>Statistical tests performed</b>                               | 16 (27)                                                           | 30 (12)                                 |
| <b>Subgroup analyses conducted</b>                               | 13 (22)                                                           | 23 (10)                                 |
| <b>Identifying the outcome as a primary or secondary outcome</b> | 1 (2)                                                             | 3 (1)                                   |

<sup>a</sup> Studies that had a preprint posted on-or-after the date of revision, acceptance, or publication were removed. This removed 1 study. Due to differences in journal reporting of these dates, there was overlap in those studies and no comparison in others. Therefore, we expanded the studies removed to include those with preprints posted 1-7 days before the date of revision, acceptance, or publication, thus removing 7 studies from the sensitivity analysis.

**Table S4: Sensitivity Analysis of Categories of Spin in Preprints and Journal Publications (n=60) <sup>a</sup>**

|                                                                                                                           | <b>Neither, No. (%)</b> | <b>Both, No. (%)</b> | <b>Preprint Only, No. (%)</b> | <b>Journal Publication Only, No. (%)</b> |
|---------------------------------------------------------------------------------------------------------------------------|-------------------------|----------------------|-------------------------------|------------------------------------------|
| <b>Inappropriate interpretation given study design</b>                                                                    | <b>49 (82)</b>          | <b>6 (10)</b>        | <b>4 (7)</b>                  | <b>1 (2)</b>                             |
| Claiming causality in non-randomized studies                                                                              | 56 (93)                 | 3 (5)                | 1 (2)                         | 0 (0)                                    |
| Interpreting a lack of statistical significance as equivalence                                                            | 59 (98)                 | 0 (0)                | 0 (0)                         | 1 (2)                                    |
| Interpreting a lack of statistical significance of harm measures as safety                                                | 58 (97)                 | 1 (2)                | 0 (0)                         | 1 (2)                                    |
| Claim of any significant difference despite lack of statistical test                                                      | 60 (100)                | 0 (0)                | 0 (0)                         | 0 (0)                                    |
| Other                                                                                                                     | 54 (90)                 | 2 (3)                | 4 (7)                         | 0 (0)                                    |
|                                                                                                                           |                         |                      |                               |                                          |
| <b>Inappropriate extrapolations or recommendations</b>                                                                    | <b>46 (77)</b>          | <b>12 (20)</b>       | <b>2 (3)</b>                  | <b>0 (0)</b>                             |
| Suggestion that the treatment or test is more clinically relevant or useful than is justified given the study design.     | 54 (90)                 | 5 (8)                | 1 (2)                         | 0 (0)                                    |
| Recommendations made to population groups / contexts outside of those investigated.                                       | 56 (93)                 | 3 (5)                | 1 (2)                         | 0 (0)                                    |
| (Observational) Expressing confidence in a treatment or test without suggesting the need for further confirmatory studies | 59 (98)                 | 0 (0)                | 1 (2)                         | 0 (0)                                    |
| (Observational) Making recommendations without stating an RCT should be done to validate the recommendation               | 59 (98)                 | 1 (2)                | 0 (0)                         | 0 (0)                                    |
| Other                                                                                                                     | 56 (93)                 | 3 (5)                | 1 (2)                         | 0 (0)                                    |
|                                                                                                                           |                         |                      |                               |                                          |
| <b>Selective focusing on positive results or more favorable data presentation</b>                                         | <b>48 (80)</b>          | <b>7 (12)</b>        | <b>2 (3)</b>                  | <b>3 (5)</b>                             |
| Discussing only significant (non-primary) results to distract from non-significant (primary results)                      | 59 (98)                 | 0 (0)                | 1 (2)                         | 0 (0)                                    |
| Omitting non-significant results from Abstract/Discussion/Conclusion                                                      | 58 (97)                 | 1 (2)                | 0 (0)                         | 1 (2)                                    |
| Claiming significant effects for non-significant results                                                                  | 60 (100)                | 0 (0)                | 0 (0)                         | 0 (0)                                    |
| Acknowledge statistically nonsignificant results for the primary outcome but emphasize the beneficial effect of treatment | 59 (98)                 | 1 (2)                | 0 (0)                         | 0 (0)                                    |

|                                                                                                                      |          |       |       |       |
|----------------------------------------------------------------------------------------------------------------------|----------|-------|-------|-------|
| Describing non-significant results as "trending towards significance"                                                | 59 (98)  | 1 (2) | 0 (0) | 0 (0) |
| Mentioning adverse events in the abstract/discussion/conclusion but minimizing their potential effect or importance. | 58 (97)  | 1 (2) | 1 (2) | 0 (0) |
| Misleading description of study design as one that is more robust                                                    | 60 (100) | 0 (0) | 0 (0) | 0 (0) |
| No considerations of the limitations of the study                                                                    | 58 (97)  | 2 (3) | 0 (0) | 0 (0) |
| Use of linguistic spin                                                                                               | 59 (98)  | 0 (0) | 0 (0) | 1 (2) |
| Other                                                                                                                | 55 (92)  | 1 (2) | 2 (3) | 2 (3) |

<sup>a</sup> Studies that had a preprint posted on-or-after the date of revision, acceptance, or publication were removed. This removed 1 study. Due to differences in journal reporting of these dates, there was overlap in those studies and no comparison in others. Therefore, we expanded the studies removed to include those with preprints posted 1-7 days before the date of revision, acceptance, or publication, thus removing 7 studies from the analysis



## STROBE Statement—checklist of items that should be included in reports of observational studies

|                           | Item No | Recommendation                                                                                                                                                                                                                                                                                                                                                                                                                                                         | Included                                                                                              | Reference                                                                                                                               |
|---------------------------|---------|------------------------------------------------------------------------------------------------------------------------------------------------------------------------------------------------------------------------------------------------------------------------------------------------------------------------------------------------------------------------------------------------------------------------------------------------------------------------|-------------------------------------------------------------------------------------------------------|-----------------------------------------------------------------------------------------------------------------------------------------|
| <b>Title and abstract</b> | 1       | (a) Indicate the study's design with a commonly used term in the title or the abstract                                                                                                                                                                                                                                                                                                                                                                                 | Yes                                                                                                   | in abstract                                                                                                                             |
|                           |         | (b) Provide in the abstract an informative and balanced summary of what was done and what was found                                                                                                                                                                                                                                                                                                                                                                    | Yes                                                                                                   | Page 5                                                                                                                                  |
| <b>Introduction</b>       |         |                                                                                                                                                                                                                                                                                                                                                                                                                                                                        |                                                                                                       |                                                                                                                                         |
| Background/rationale      | 2       | Explain the scientific background and rationale for the investigation being reported                                                                                                                                                                                                                                                                                                                                                                                   | Yes                                                                                                   | Pages 6-7                                                                                                                               |
| Objectives                | 3       | State specific objectives, including any prespecified hypotheses                                                                                                                                                                                                                                                                                                                                                                                                       | Yes                                                                                                   | Page 7, para 2                                                                                                                          |
| <b>Methods</b>            |         |                                                                                                                                                                                                                                                                                                                                                                                                                                                                        |                                                                                                       |                                                                                                                                         |
| Study design              | 4       | Present key elements of study design early in the paper                                                                                                                                                                                                                                                                                                                                                                                                                | Yes                                                                                                   | Presented as subheadings in methods section                                                                                             |
| Setting                   | 5       | Describe the setting, locations, and relevant dates, including periods of recruitment, exposure, follow-up, and data collection                                                                                                                                                                                                                                                                                                                                        | Yes                                                                                                   | Abstract and pages 8-9                                                                                                                  |
| Participants              | 6       | (a) <i>Cohort study</i> —Give the eligibility criteria, and the sources and methods of selection of participants. Describe methods of follow-up<br><i>Case-control study</i> —Give the eligibility criteria, and the sources and methods of case ascertainment and control selection. Give the rationale for the choice of cases and controls<br><i>Cross-sectional study</i> —Give the eligibility criteria, and the sources and methods of selection of participants | <i>Cohort study</i> -<br>NA<br><br><i>Case-control</i> -<br>NA<br><br><i>Cross-sectional</i> -<br>YES | <i>Cross-sectional study – Eligibility criteria</i> : Inclusion exclusion criteria. Pages 9-10. <i>Sources of selection</i> : Page 8-9. |
|                           |         | (b) <i>Cohort study</i> —For matched studies, give matching criteria and number of exposed and unexposed<br><i>Case-control study</i> —For matched studies, give matching                                                                                                                                                                                                                                                                                              | <i>Cohort study</i><br>NA<br><br><i>Case-control</i> -<br>NA                                          |                                                                                                                                         |

|                              |    |                                                                                                                                                                                                                                                                                                           |                                                                                                      |                                                                                                                                |
|------------------------------|----|-----------------------------------------------------------------------------------------------------------------------------------------------------------------------------------------------------------------------------------------------------------------------------------------------------------|------------------------------------------------------------------------------------------------------|--------------------------------------------------------------------------------------------------------------------------------|
|                              |    | criteria and the number of controls per case                                                                                                                                                                                                                                                              |                                                                                                      |                                                                                                                                |
| Variables                    | 7  | Clearly define all outcomes, exposures, predictors, potential confounders, and effect modifiers. Give diagnostic criteria, if applicable                                                                                                                                                                  | Yes                                                                                                  | <i>Outcomes</i> - Study characteristics. Page 10<br>Primary outcomes of Results Reporting and Spin. Page 11-13.                |
| Data sources/<br>measurement | 8* | For each variable of interest, give sources of data and details of methods of assessment (measurement). Describe comparability of assessment methods if there is more than one group                                                                                                                      | Yes                                                                                                  | <i>Data Sources</i> - Data Sources and Search Strategy. Page 8<br><br><i>Methods of assessment</i> - Data extraction: Page 10. |
| Bias                         | 9  | Describe any efforts to address potential sources of bias                                                                                                                                                                                                                                                 | Yes                                                                                                  | Data extraction. Duplicate coding, Data extraction instrument. Page 10.                                                        |
| Study size                   | 10 | Explain how the study size was arrived at                                                                                                                                                                                                                                                                 | NA                                                                                                   | A universal sample - All studies that met our inclusion and exclusion criteria were included.                                  |
| Quantitative variables       | 11 | Explain how quantitative variables were handled in the analyses. If applicable, describe which groupings were chosen and why                                                                                                                                                                              | Yes                                                                                                  | Analysis. Page 13.                                                                                                             |
| Statistical methods          | 12 | (a) Describe all statistical methods, including those used to control for confounding                                                                                                                                                                                                                     | Yes                                                                                                  | Analysis: Page 13                                                                                                              |
|                              |    | (b) Describe any methods used to examine subgroups and interactions                                                                                                                                                                                                                                       | Yes                                                                                                  | Sensitivity analysis: Page 13. No subgroup analysis.                                                                           |
|                              |    | (c) Explain how missing data were addressed                                                                                                                                                                                                                                                               | NA                                                                                                   | No missing data as preprints and final publications were obtained for each included study.                                     |
|                              |    | (d) <i>Cohort study</i> —If applicable, explain how loss to follow-up was addressed<br><i>Case-control study</i> —If applicable, explain how matching of cases and controls was addressed<br><i>Cross-sectional study</i> —If applicable, describe analytical methods taking account of sampling strategy | <i>Cohort study</i> -<br>NA<br><br><i>Case-control</i> -<br>NA<br><br><i>Cross-sectional</i> -<br>NA |                                                                                                                                |
|                              |    | (e) Describe any sensitivity analyses                                                                                                                                                                                                                                                                     | Yes                                                                                                  | Sensitivity Analysis. Page 13.                                                                                                 |

Continued on next page

1  
2  
3  
4  
5  
6  
7  
8  
9  
10  
11  
12  
13  
14  
15  
16  
17  
18  
19  
20  
21  
22  
23  
24  
25  
26  
27  
28  
29  
30  
31  
32  
33  
34  
35  
36  
37  
38  
39  
40  
41  
42  
43  
44  
45  
46  
47  
48  
49  
50  
51  
52  
53  
54  
55  
56  
57  
58  
59  
60

| Results          |     |                                                                                                                                                                                                              | Included | Reference                                                                                                                                     |
|------------------|-----|--------------------------------------------------------------------------------------------------------------------------------------------------------------------------------------------------------------|----------|-----------------------------------------------------------------------------------------------------------------------------------------------|
| Participants     | 13* | (a) Report numbers of individuals at each stage of study—eg numbers potentially eligible, examined for eligibility, confirmed eligible, included in the study, completing follow-up, and analysed            | Yes      | PRISMA Diagram, Figure 1 and page 8 under Search Strategy.                                                                                    |
|                  |     | (b) Give reasons for non-participation at each stage                                                                                                                                                         | NA       | All studies that met inclusion and exclusion criteria were included                                                                           |
|                  |     | (c) Consider use of a flow diagram                                                                                                                                                                           | Yes      | PRISMA Diagram, Figure 1                                                                                                                      |
| Descriptive data | 14* | (a) Give characteristics of study participants (eg demographic, clinical, social) and information on exposures and potential confounders                                                                     | Yes      | Study characteristics. Page 13-14.                                                                                                            |
|                  |     | (b) Indicate number of participants with missing data for each variable of interest                                                                                                                          | NA       | No missing data as preprints and final publications were obtained for each included study.                                                    |
|                  |     | (c) <i>Cohort study</i> —Summarise follow-up time (eg, average and total amount)                                                                                                                             | NA       |                                                                                                                                               |
| Outcome data     | 15* | <i>Cohort study</i> —Report numbers of outcome events or summary measures over time                                                                                                                          | Yes      | Tables 1-5, Discrepancies in study characteristics – page 14, Discrepancies in results reporting, page 14-15. Discrepancies in spin, page 15. |
|                  |     | <i>Case-control study</i> —Report numbers in each exposure category, or summary measures of exposure                                                                                                         | NA       |                                                                                                                                               |
|                  |     | <i>Cross-sectional study</i> —Report numbers of outcome events or summary measures                                                                                                                           | NA       |                                                                                                                                               |
| Main results     | 16  | (a) Give unadjusted estimates and, if applicable, confounder-adjusted estimates and their precision (eg, 95% confidence interval). Make clear which confounders were adjusted for and why they were included | Yes      | <i>Unadjusted estimates</i> - Tables 1-4                                                                                                      |
|                  |     | (b) Report category boundaries when continuous variables were categorized                                                                                                                                    | NA       |                                                                                                                                               |
|                  |     | (c) If relevant, consider translating estimates of relative risk into absolute risk for a meaningful time period                                                                                             | NA       |                                                                                                                                               |

|                          |    |                                                                                                                                                                            |     |                                                                               |
|--------------------------|----|----------------------------------------------------------------------------------------------------------------------------------------------------------------------------|-----|-------------------------------------------------------------------------------|
| Other analyses           | 17 | Report other analyses done—eg analyses of subgroups and interactions, and sensitivity analyses                                                                             | Yes | Sensitivity analysis, page 16 and Supplemental file. Tables S1 – S4.          |
| <b>Discussion</b>        |    |                                                                                                                                                                            |     |                                                                               |
| Key results              | 18 | Summarise key results with reference to study objectives                                                                                                                   | Yes | Principal Findings: Page 16-17                                                |
| Limitations              | 19 | Discuss limitations of the study, taking into account sources of potential bias or imprecision. Discuss both direction and magnitude of any potential bias                 | Yes | Strengths and weaknesses: Pages 20-21                                         |
| Interpretation           | 20 | Give a cautious overall interpretation of results considering objectives, limitations, multiplicity of analyses, results from similar studies, and other relevant evidence | Yes | Discussion re peer review - Pages 18. Overall conclusion – page 21            |
| Generalisability         | 21 | Discuss the generalisability (external validity) of the study results                                                                                                      | Yes | Comparison to other studies – page 19-20. Strengths and weaknesses – page 20. |
| <b>Other information</b> |    |                                                                                                                                                                            |     |                                                                               |
| Funding                  | 22 | Give the source of funding and the role of the funders for the present study and, if applicable, for the original study on which the present article is based              | Yes | page 21                                                                       |

\*Give information separately for cases and controls in case-control studies and, if applicable, for exposed and unexposed groups in cohort and cross-sectional studies.

**Note:** An Explanation and Elaboration article discusses each checklist item and gives methodological background and published examples of transparent reporting. The STROBE checklist is best used in conjunction with this article (freely available on the Web sites of PLoS Medicine at <http://www.plosmedicine.org/>, Annals of Internal Medicine at <http://www.annals.org/>, and Epidemiology at <http://www.epidem.com/>). Information on the STROBE Initiative is available at [www.strobe-statement.org](http://www.strobe-statement.org).

# BMJ Open

## Cross-sectional study of preprints and final journal publications from COVID-19 studies: Discrepancies in results reporting and spin in interpretation

|                                 |                                                                                                                                                                                                                                                                                                                                                                                                                                                                                                                                                                                                                                                                                                                                                                                                                                                                                                                                             |
|---------------------------------|---------------------------------------------------------------------------------------------------------------------------------------------------------------------------------------------------------------------------------------------------------------------------------------------------------------------------------------------------------------------------------------------------------------------------------------------------------------------------------------------------------------------------------------------------------------------------------------------------------------------------------------------------------------------------------------------------------------------------------------------------------------------------------------------------------------------------------------------------------------------------------------------------------------------------------------------|
| Journal:                        | <i>BMJ Open</i>                                                                                                                                                                                                                                                                                                                                                                                                                                                                                                                                                                                                                                                                                                                                                                                                                                                                                                                             |
| Manuscript ID                   | bmjopen-2021-051821.R1                                                                                                                                                                                                                                                                                                                                                                                                                                                                                                                                                                                                                                                                                                                                                                                                                                                                                                                      |
| Article Type:                   | Original research                                                                                                                                                                                                                                                                                                                                                                                                                                                                                                                                                                                                                                                                                                                                                                                                                                                                                                                           |
| Date Submitted by the Author:   | 27-May-2021                                                                                                                                                                                                                                                                                                                                                                                                                                                                                                                                                                                                                                                                                                                                                                                                                                                                                                                                 |
| Complete List of Authors:       | Bero, Lisa; University of Colorado - Anschutz Medical Campus, General Internal Medicine / Public Health / Center for Bioethics and Humanities<br>Lawrence, Rosa; University of Colorado - Anschutz Medical Campus, General Internal Medicine / Public Health / Center for Bioethics and Humanities<br>Leslie, Louis; University of Colorado - Anschutz Medical Campus, General Internal Medicine / Public Health / Center for Bioethics and Humanities<br>Chiu, Kellia; The University of Sydney,<br>McDonald, Sally; The University of Sydney<br>Page, Matthew; Monash University, School of Public Health and Preventive Medicine; Monash University<br>Grundy, Quinn; University of Sydney, Faculty of Nursing<br>Parker, Lisa; The University of Sydney, Centre for Values, Ethics and the Law in Medicine<br>Boughton, Stephanie; Cochrane<br>Kirkham, Jamie J.; Manchester University, Biostatistics<br>Featherstone, Robin; Cochrane |
| <b>Primary Subject Heading</b>: | Medical publishing and peer review                                                                                                                                                                                                                                                                                                                                                                                                                                                                                                                                                                                                                                                                                                                                                                                                                                                                                                          |
| Secondary Subject Heading:      | Public health, Research methods                                                                                                                                                                                                                                                                                                                                                                                                                                                                                                                                                                                                                                                                                                                                                                                                                                                                                                             |
| Keywords:                       | ETHICS (see Medical Ethics), PUBLIC HEALTH, QUALITATIVE RESEARCH                                                                                                                                                                                                                                                                                                                                                                                                                                                                                                                                                                                                                                                                                                                                                                                                                                                                            |
|                                 |                                                                                                                                                                                                                                                                                                                                                                                                                                                                                                                                                                                                                                                                                                                                                                                                                                                                                                                                             |

SCHOLARONE™  
Manuscripts



I, the Submitting Author has the right to grant and does grant on behalf of all authors of the Work (as defined in the below author licence), an exclusive licence and/or a non-exclusive licence for contributions from authors who are: i) UK Crown employees; ii) where BMJ has agreed a CC-BY licence shall apply, and/or iii) in accordance with the terms applicable for US Federal Government officers or employees acting as part of their official duties; on a worldwide, perpetual, irrevocable, royalty-free basis to BMJ Publishing Group Ltd ("BMJ") its licensees and where the relevant Journal is co-owned by BMJ to the co-owners of the Journal, to publish the Work in this journal and any other BMJ products and to exploit all rights, as set out in our [licence](#).

The Submitting Author accepts and understands that any supply made under these terms is made by BMJ to the Submitting Author unless you are acting as an employee on behalf of your employer or a postgraduate student of an affiliated institution which is paying any applicable article publishing charge ("APC") for Open Access articles. Where the Submitting Author wishes to make the Work available on an Open Access basis (and intends to pay the relevant APC), the terms of reuse of such Open Access shall be governed by a Creative Commons licence – details of these licences and which [Creative Commons](#) licence will apply to this Work are set out in our licence referred to above.

Other than as permitted in any relevant BMJ Author's Self Archiving Policies, I confirm this Work has not been accepted for publication elsewhere, is not being considered for publication elsewhere and does not duplicate material already published. I confirm all authors consent to publication of this Work and authorise the granting of this licence.

1  
2  
3 **Cross-sectional study of preprints and final journal publications from COVID-19 studies:**  
4 **Discrepancies in results reporting and spin in interpretation**  
5

6 Lisa Bero, PhD (corresponding author)  
7

8 Professor of Medicine and Public Health  
9  
10 Chief Scientist, Center for Bioethics and Humanities  
11  
12 University of Colorado Anschutz Medical Campus  
13  
14 13080 E. 19<sup>th</sup> Ave, Aurora, CO 80045 | Mail Stop B137  
15  
16 [lisa.bero@CUAnschutz.edu](mailto:lisa.bero@CUAnschutz.edu)  
17

18 ORCID ID: 0000 0003 1893 6651  
19

20 Rosa Lawrence, BA  
21

22 Professional Research Assistant  
23  
24 Center for Bioethics and Humanities  
25  
26 University of Colorado Anschutz Medical Campus  
27  
28 [rosa.lawrence@cuanschutz.edu](mailto:rosa.lawrence@cuanschutz.edu)  
29

30  
31 ORCID ID: 0000 0001 7954 5860  
32

33 Louis Leslie, BA  
34

35 Research Assistant  
36  
37 Center for Bioethics and Humanities  
38  
39 University of Colorado Anschutz Medical Campus  
40  
41 [louis.lesile@cuanschutz.edu](mailto:louis.lesile@cuanschutz.edu)  
42

43  
44 ORCID ID: 0000 0002 4013 4914  
45

46 Kellia Chiu, BPharm (Hons)  
47

48 PhD Candidate  
49  
50 Charles Perkins Centre & School of Pharmacy, Faculty of Medicine and Health  
51  
52 The University of Sydney, Sydney, Australia  
53  
54 [kellia.chiu@sydney.edu.au](mailto:kellia.chiu@sydney.edu.au)  
55  
56

1  
2  
3 ORCID: 0000-0002-4358-6641  
4

5 Sally McDonald, MNutrDiet  
6

7 PhD Candidate  
8

9 Charles Perkins Centre & School of Pharmacy, Faculty of Medicine and Health  
10

11 The University of Sydney, Sydney, Australia  
12

13 [sally.mcdonald@sydney.edu.au](mailto:sally.mcdonald@sydney.edu.au)  
14

15 ORCID:0000-0002-1406-3016  
16

17 Matthew J Page, PhD  
18

19 Senior Research Fellow  
20

21 School of Public Health and Preventive Medicine  
22

23 Monash University, Melbourne, Australia  
24

25 [matthew.page@monash.edu](mailto:matthew.page@monash.edu)  
26

27 ORCID: 0000-0002-4242-7526  
28

29 Quinn Grundy, RN, PhD  
30

31 Assistant Professor  
32

33 Lawrence S. Bloomberg Faculty of Nursing, University of Toronto  
34

35 [quinn.grundy@utoronto.ca](mailto:quinn.grundy@utoronto.ca)  
36

37 ORCID: 0000-0002-7640-8614  
38

39 Lisa Parker, MBBS (Hons), PhD  
40

41 Honorary Lecturer  
42

43 Charles Perkins Centre and School of Pharmacy, Faculty of Medicine and Health  
44

45 The University of Sydney, Sydney, Australia  
46

47 [lisa.parker@sydney.edu.au](mailto:lisa.parker@sydney.edu.au)  
48

49 ORCID: 0000-0001-8635-6953  
50

51 Stephanie L Boughton, MBBS  
52

53 Research Integrity Editor  
54

55 Editorial and Methods Department, Cochrane, UK  
56  
57



1  
2  
3 E: [sboughton@cochrane.org](mailto:sboughton@cochrane.org)  
4

5 ORCID: 0000-0001-5374-7464  
6  
7

8 Jamie J Kirkham, BSc, MSc, PhD  
9

10 Professor of Biostatistics  
11

12 Centre for Biostatistics, Manchester Academic Health Science Centre  
13

14 University of Manchester, Manchester, United Kingdom  
15

16 [jamie.kirkham@manchester.ac.uk](mailto:jamie.kirkham@manchester.ac.uk)  
17

18 ORCID: 0000-0003-2579-9325  
19  
20

21 Robin Featherstone, MLIS  
22

23 Information Specialist  
24

25 Cochrane Editorial and Methods Department UK  
26

27 [rfeatherstone@cochrane.org](mailto:rfeatherstone@cochrane.org)  
28

29 ORCID: 0000-0003-2517-2258  
30  
31  
32  
33  
34  
35  
36  
37  
38  
39  
40  
41  
42  
43  
44  
45  
46  
47  
48  
49  
50  
51  
52  
53  
54  
55  
56  
57  
58  
59  
60

## ABSTRACT

Objective: To compare results reporting and the presence of spin in COVID-19 study preprints with their finalized journal publications

Design: Cross-sectional

Setting: International medical literature

Participants: Preprints and final journal publications of 67 interventional and observational studies of COVID-19 treatment or prevention from the Cochrane COVID-19 Study Register published between March 1, 2020 and October 30, 2020

Main outcome measures: Study characteristics and discrepancies in 1) Results reporting (number of outcomes, outcome descriptor, measure, metric, assessment time point, data reported, reported statistical significance of result, type of statistical analysis, subgroup analyses (if any), whether outcome was identified as primary or secondary) and 2) Spin (reporting practices that distort the interpretation of results so they are viewed more favorably).

Results: Of 67 included studies, 23 (34%) had no discrepancies in results reporting between preprints and journal publications. Fifteen (22%) studies had at least one outcome that was included in the journal publication, but not the preprint; 8 (12%) had at least one outcome that was reported in the preprint only. For outcomes that were reported in both preprints and journals, common discrepancies were differences in numerical values and statistical significance, additional statistical tests and subgroup analyses and longer follow-up times for outcome assessment in journal publications.

At least one instance of spin occurred in both preprints and journals in 23 / 67 (34%) studies, the preprint only in 5 (7%), and the journal publications only in 2 (3%). Spin was removed between the preprint and journal publication in 5/67 (7%) studies; but added in 1/67 (1%) study.

Conclusions: The COVID-19 preprints and their subsequent journal publications were largely similar in reporting of study characteristics, outcomes and spin. All COVID-19 studies published as preprints and journal publications should be critically evaluated for discrepancies and spin.

## Article summary

### Strengths and limitations of this study

- We examine two critical threats to research integrity –components of outcome reporting and the presence of spin – in COVID-19 studies on treatment or prevention published as preprints and journal publications.
- We selected studies from the Cochrane COVID-19 Register rather than conducting a literature search to optimize the identification COVID-19 clinical research that is useful for systematic reviews.
- We may have identified a different number of discrepancies if we compared later versions of the preprint, rather than the first version, with the journal publication.
- Although clinically important, our focus on COVID-19 research may not be representative of other types of research published as preprints, then journal publications.
- We limited our sample to preprints which authors submitted to journals and that were published.

### EQUATOR REPORTING GUIDELINE: STROBE

## **INTRODUCTION**

Preprints have been advocated as a means for rapid sharing and updating of research findings, which could be particularly valuable during a pandemic.[1] Preprints are non-peer-reviewed postings of research articles. Preprints have been a common form of publication in the natural sciences for decades, and more recently in the life sciences. In 2019, BMJ, Yale and Cold Spring Harbor Laboratory launched medRxiv, a preprint server dedicated to clinical and health sciences research.

In April 2020, medRxiv published between 50 and 100 COVID-19-related preprints daily.[1] The accelerated pace of research related to COVID-19 has increased the potential impact and risk of using preprints. Widespread public dissemination of preprints may spread misinformation.[2] A study comparing 34 preprints and 62 publications about therapies for COVID-19 found that publications had significantly more citations than the preprints (median of 22 vs 5.5 citations;  $P = .01$ ), but there were no significant differences for attention and online engagement metrics.[3]

Most preprint servers conduct some type of screening prior to posting, commonly related to the scope of the article, plagiarism, and compliance with legal and ethical requirements[4], but preprints have not been peer-reviewed and may not meet the methodological and reporting requirements of a journal. A review of the medRxiv preprint server one year after its launch found that 9967 of 11164 (89%) of submissions passed screening.[5] It is not clear whether or how preprint servers might screen for quality of results reporting or spin.[6,7] Spin refers to specific reporting practices that distort the interpretation of results so that results are viewed more favorably.

Preliminary studies suggest that reporting discrepancies may exist between preprints and subsequent publications. However, there has been no systematic assessment of results reporting or spin between preprints and their final journal publications. Carneiro et al. counted reported items from a checklist meant to cover common points from multiple reporting

1  
2  
3 guidelines and found reporting quality to be marginally higher in journal articles, both in a set  
4 of bioRxiv preprints matched to their journal publication (n=56 article/group) and in an  
5 unmatched set (n=76 articles/group).[8] An analysis of preprints from arXiv, a primarily physics/  
6 mathematics preprint server, and their journal publications using text comparison algorithms  
7 found little difference between preprints and published articles.[9] However, an analysis of  
8 medRxiv and bioRxiv preprints related to COVID-19 pharmacological interventions found that  
9 only 24% (23/97) of preprints were published in a journal within 0 to 98 days (median: 42.0  
10 days). Among these, almost half (11/23, 48%) had modifications in the title or results section,  
11 although the nature of these modifications is not described.[10] An analysis of spin in preprints  
12 and journal publications for COVID-19 trials found a single difference between 2 matched pairs  
13 of preprints and their journal publications: the discussion of limitations in the abstract.  
14 Limitations were discussed in the abstract of one article, but not in its accompanying preprint.  
15 [11] An analysis of 66 preprint-article pairs of COVID-19 studies found 38% had changes in study  
16 results, such as a numeric change in hazard ratio or a change in p value, and 29% had changes  
17 in abstract conclusions, most commonly from “positive without reporting uncertainty” in the  
18 preprint to “positive with reporting of uncertainty” in the article.[12]

19  
20  
21  
22  
23  
24  
25  
26  
27  
28  
29  
30  
31  
32  
33  
34  
35  
36  
37  
38  
39  
40  
41  
42  
43  
44  
45  
46  
47  
48  
49  
50  
51  
52  
53  
54  
55  
56  
57  
58  
59  
60  
The trustworthiness and validity of scientific publications, even after peer review, are  
weakened by a variety of problems.[13,14] Selective and incomplete results reporting[15,16]  
and spin[17,18] are two critical threats, especially for clinical studies of treatment or  
prevention. These reporting practices could be particularly dangerous for users of COVID-19  
research as they can inflate the efficacy of interventions and underestimate harms. Given the  
high prevalence, visibility, and potentially rapid implementation of COVID-19 research  
published as preprints, this study is the first to compare components of outcome reporting and  
the presence of spin in COVID-19 studies on treatment or prevention that are published both as  
preprints and journal publications.

## **METHODS**

The protocol for this study was registered in the Open Science Framework.[19]

1  
2  
3  
4  
5 **Data Source and Search Strategy:** We sampled studies from the Cochrane COVID-19 Study  
6 Register (<https://covid-19.cochrane.org/>), a freely-available, continually-updated, annotated  
7 reference collection of human primary studies on COVID-19, including interventional,  
8 observational, diagnostic, prognostic, epidemiological and qualitative designs. The register is  
9 "study-based," meaning references to the same study (e.g., press releases, trial registry records,  
10 preprints, journal pre-proofs, journal final publications, retraction notices) are all linked to a  
11 single study identifier. References are screened for eligibility to determine if they are primary  
12 studies (e.g., not opinion pieces or narrative reviews). Data sources for the Cochrane COVID-19  
13 Study Register at the time of the search included ClinicalTrials.gov, the International Clinical  
14 Trials Registry Platform (ICTRP), PubMed, medRxiv and Embase.com. The Cochrane register  
15 prioritizes medRxiv as a preprint source as an internal sensitivity analysis in May 2020 showed  
16 that 90% (166/185) of the preprints that were eligible for systematic reviews came from this  
17 source. The register also includes preprint records sourced from PubMed.  
18  
19  
20  
21  
22  
23  
24  
25  
26  
27  
28  
29

30 All studies in the register are classified by study design (interventional, observational,  
31 modelling, qualitative, other or unclear) and research aim (prevention, treatment and  
32 management, diagnostic/prognostic, epidemiology, health services research, mechanism,  
33 transmission, other). Studies may be classified as having multiple research aims.  
34  
35  
36  
37

38 Four searches using the register's search filters for study reference types (preprints and journal  
39 articles) and study characteristics (study type and study aim) were used to retrieve references  
40 with a study aim of a) treatment and management or b) prevention and classified as  
41 interventional or observational (see OSF project for the complete search strategies:  
42 <https://osf.io/8qfby/>). As the register is updated daily, we repeated the search. The Cochrane  
43 COVID-19 Study Register was first searched by RF on October 13, and updated on October 29,  
44 2020. Results were exported to Excel and duplicates manually identified. The searches  
45 identified 297 references for 117 studies, with 67 (21 interventional, 46 observational) that met  
46 our inclusion and exclusion criteria for study selection (Figure 1).  
47  
48  
49  
50  
51  
52  
53  
54  
55  
56  
57

1  
2  
3 **Inclusion and exclusion criteria for study selection:** We included studies of COVID-19  
4 treatment or prevention identified in the search that had both a posted preprint and final  
5 journal publication.  
6  
7

8  
9  
10 We included studies with aims of diagnosis/prognosis, epidemiology, health services research,  
11 mechanism, transmission and other if they also had an aim coded as a) treatment and  
12 management or b) prevention. We excluded modelling studies, qualitative studies and studies  
13 that reported only descriptive data (e.g., demographic characteristics).  
14

15  
16 We screened all records for each included study to identify posted preprints and journal  
17 publications from each study. We excluded duplicates and records for protocols, trial registries,  
18 commentaries, letters to the editor, news articles, and press releases. We excluded records  
19 that did not report results and non-English records.  
20  
21  
22  
23  
24

25  
26  
27 We compared the preprint and journal publication for each included study. In the case of  
28 multiple preprints or journal publications reporting study results, we selected the first preprint  
29 version and the final journal publication that reported on similar study populations. This was to  
30 ensure that the preprint version evaluated in our study had not been altered in response to any  
31 comments, which could constitute a form of peer review, and that it was representative of the  
32 version most likely to be seen by clinicians, journalists and other research users as new research  
33 became available.  
34  
35  
36  
37  
38  
39  
40

41 **Data extraction:** Ten investigators (LB, SLB, KC, QG, JJK, LL, RL, SMc, LP, MJP) working  
42 independently in pairs extracted data from the included studies. Discrepancies in data  
43 extraction were resolved by consensus. If agreement could not be reached, an investigator  
44 who was not part of the coding pair resolved the discrepancies. All extracted data from the  
45 included studies was stored in REDCap, a secure web-based application for the collection and  
46 management of data.[20] We extracted data from the both the medRxiv page and PDF for  
47 preprints and the online publication or PDF for journal articles, referring to the PDF if  
48  
49  
50  
51  
52  
53  
54  
55  
56  
57

1  
2  
3 information differed. We extracted data on results reporting, presence of spin and study  
4 characteristics as described below.  
5  
6  
7

8  
9 **Study characteristics:** For each preprint, we recorded the earliest posting date; for each journal  
10 publication we extracted the submitted/received, reviewed, revised, accepted and published  
11 date(s), where available.  
12  
13  
14  
15

16 From each journal publication, we extracted: authors, title, funding source, author conflicts of  
17 interests, ethics approval, country of study, and sample size. For the accompanying preprint, we  
18 determined if these study characteristics were also reported. If they were, and the content of  
19 the item differed between the preprint and publication, details of the discrepancy were  
20 recorded. In addition, we recorded discrepancies between the preprint and journal publication  
21 in demographic characteristics of study participants (e.g., sex, race/ethnicity, diagnosis),  
22 discussion of limitations (regardless of whether there was a labeled limitations section or not),  
23 and tables and figures.  
24  
25  
26  
27  
28  
29  
30  
31

32 **Primary outcomes:** Our primary outcome measures were 1) discrepancies in results reporting  
33 between preprints and journal publications and 2) presence and type of spin in preprints and  
34 journal publications.  
35  
36  
37  
38  
39

#### 40 Results reporting:

41 We collected data on discrepancies in 1) number of outcomes reported in preprints and journal  
42 publications and, for outcomes reported in both preprints and journal publications, 2)  
43 components of results reporting. For each journal publication and preprint, we recorded the  
44 number of outcomes reported and, whether outcomes were reported only in the preprint or  
45 journal publication, and the outcome descriptor (e.g., mortality, hospitalization, transmission,  
46 immunogenicity, harms).  
47  
48  
49  
50  
51  
52  
53  
54  
55  
56  
57  
58  
59  
60



1  
2  
3 For outcomes that were reported in both preprints and journal publications, , we collected data  
4 on components of outcome reporting based on recommendations for clinical study results  
5 reporting.[16,21] We recorded whether there were discrepancies between any components of  
6 outcome reporting between journal publications and preprints. We extracted the text relevant  
7 to each discrepancy:  
8  
9  
10  
11

- 12
- 13
- 14 ● Measure (e.g., PCR test)
- 15
- 16 ● Metric (e.g., mean change from baseline, proportion of people)
- 17
- 18 ● Time point at which the assessment was made (e.g., 1 week after starting treatment).
- 19
- 20 ● Numerical values reported (e.g., effect estimate and measure of precision)
- 21
- 22 ● Statistical significance of result (as reported)
- 23
- 24 ● Type of statistical analysis (e.g., regression, chi-squared test)
- 25
- 26 ● Subgroup analyses (if any)
- 27
- 28 ● Whether outcome was identified as primary or secondary
- 29

### 30 Spin:

31  
32 Studies have used a variety of methods to measure spin in randomized controlled trials and  
33 observational studies.[17] Based on our previously developed typology of spin derived from a  
34 systematic review of spin studies,[17] we developed and pretested a coding tool for spin that  
35 can be applied to both interventional and observational studies of treatment or prevention. In  
36 the context of research on treatment or prevention of COVID-19, the most meaningful  
37 consequences of spin are overinterpretation of efficacy and underestimation of harms.  
38 Therefore, our tool emphasizes these manifestations of spin. We searched the abstracts and  
39 full text of each preprint and journal publication for 3 primary categories of spin, and  
40 accompanying subcategories:  
41  
42  
43  
44  
45  
46  
47  
48  
49

#### 50 1) Inappropriate interpretation given study design

- 51
- 52 ● Claiming causality in non-randomized studies
- 53
- 54 ● Interpreting a lack of statistical significance as equivalence
- 55
- 56
- 57

- 1
- 2
- 3 ● Interpreting a lack of statistical significance of harm measures as safety
- 4 ● Claim of any significant difference despite lack of statistical test
- 5 ● Other
- 6
- 7
- 8
- 9 2) Inappropriate extrapolations or recommendations
- 10 ● Suggestion that the intervention or exposure is more clinically relevant or useful than is
- 11 justified given the study design
- 12 ● Recommendation made to population groups / contexts outside of those investigated
- 13 ● (Observational) Expressing confidence in an intervention or exposure without
- 14 suggesting the need for further confirmatory studies
- 15 ● Other
- 16
- 17
- 18
- 19
- 20
- 21 3) Selectively focusing on positive results or more favorable data presentation
- 22 ● Discussing only significant (non-primary) results to distract from non-significant primary
- 23 results
- 24 ● Omitting non-significant results from abstract / discussion / conclusion
- 25 ● Claiming significant effects for non-significant results
- 26 ● Acknowledge statistically nonsignificant results from the primary outcome but
- 27 emphasize the beneficial effect of treatment
- 28 ● Describing non-significant results as “trending towards significance”
- 29 ● Mentioning adverse effects in the abstract / discussion /conclusion but minimizing their
- 30 potential effect or importance
- 31 ● Misleading description of study design as one that is more robust
- 32 ● Use of linguistic spin
- 33 ● Other
- 34
- 35
- 36
- 37
- 38
- 39
- 40
- 41
- 42
- 43
- 44
- 45
- 46

47 **Analysis:** We report the frequency and types of discrepancies in study characteristics and  
48 results reporting between preprints and journal publications. We report the proportion of  
49 preprints and journal publications with spin and the types of spin. We iteratively analyzed the  
50 text descriptions of discrepancies identified; we grouped descriptions into common categories,  
51  
52  
53  
54  
55  
56  
57

1  
2  
3 while still accounting for all instances of discrepant reporting, even if it only occurred once, to  
4 demonstrate the range of the phenomenon.  
5  
6  
7

8  
9 To determine whether preprints that were posted after an article received peer review  
10 influenced the number of discrepancies, we conducted a *post hoc* sensitivity analysis by  
11 removing 7 studies where the preprint was posted up to 7 days before the revision, acceptance,  
12 or publication dates of the journal publication.  
13  
14  
15

16  
17  
18 Our protocol modification, list of included preprints and journal publications, data dictionary  
19 and dataset are available in our OSF project linked to our protocol: <https://osf.io/5ru8w/>.  
20  
21  
22

23 **Ethics approval:** This study analyzes publicly available information and is exempt from ethics  
24 review.  
25  
26  
27

### 28 **Patient and Public Involvement**

29 No patient involvement.  
30  
31  
32  
33  
34  
35  
36  
37  
38  
39  
40  
41  
42  
43  
44  
45  
46  
47  
48  
49  
50  
51  
52  
53  
54  
55  
56  
57  
58  
59  
60

## **RESULTS**

**Study characteristics:** Of the 67 included studies, 57 were studies of treatment and management, 9 of prevention, and 1 of both. The preprints and journal publications were published between March 1, 2020 and October 30, 2020 with a mean time between preprint and journal publication of 65.4 days (range 0 to 271 days). The topics of the studies varied and included effects of clinical and public health interventions, associations of risk factors with COVID-19 symptoms, and ways to improve implementation of public health measures, such as social distancing. Almost a third of studies (21/67, 31%) were conducted in the United States, followed by Italy and Spain (n = 6, 9% each), and China (n = 5, 7%). The majority of studies reported public or non-profit funding sources (n=32, 49%) or that no funding was provided (n=24, 36%). Over half the studies also reported that the authors had no conflicts of interest (n=37, 53%).

**Discrepancies in study characteristics:** Table 1 shows discrepancies in study characteristics reported in preprints and journal publications. The Table shows whether each study characteristic was reported or not; if a study characteristic was reported in both the preprint and journal publications, discrepancies in content are described. More preprints than journal publications reported funding source, author conflicts of interest and ethics approval; more journal publications than preprints reported participant demographics and study limitations. In all categories, most discrepancies occurred in the content of items that were reported, rather than in whether the item was present or not. For example, journal publications contained additional information on funding sources, conflicts of interest, demographic characteristics, and limitations, as well as more tables and figures compared to preprints (Table 1).

**Results reporting:** Of the 67 studies, 23 (34%) had no discrepancies in results reporting between preprints and journal publications (Table 2). Twenty-three studies had outcomes that were missing from either the preprint or the journal publication. Fifteen (22%) studies had at least one outcome that was included in the journal publication, but not the preprint; 8 (12%)

1  
2  
3 had at least one outcome that was reported in the preprint only. The included studies had  
4 multiple outcomes. The majority of studies with missing reported outcomes (16/23, 70%) had  
5 one outcome missing from either the preprint or journal publication. However, two studies had  
6 5 outcomes missing from the journal publication, but reported in the preprint only.[22–25] As  
7 described in Table 2, these omissions included important clinical or harm outcomes. For  
8 example, one preprint omitted toxicity outcomes that were reported in the journal  
9 publication.[26,27]  
10  
11  
12  
13  
14  
15  
16  
17

18 Table 3 shows the types of discrepancies in components of results reporting. We report the  
19 number of studies that had at least one discrepancy and, because studies have multiple  
20 outcomes, the number of discrepancies across all outcomes in the 67 studies. The most  
21 frequent types of discrepancies between outcomes reported in both preprints and journal  
22 publications were in the numerical values reported, statistical tests performed, subgroup  
23 analyses conducted, statistical significance reported, and timepoint at which the outcome was  
24 assessed (Table 3). The types of discrepancies were variable, although journal publications  
25 consistently included additional statistical analyses and subgroup analyses compared to  
26 preprints. Journal publications more frequently reported outcomes measured over a longer  
27 time period than preprints.  
28  
29  
30  
31  
32  
33  
34  
35  
36  
37

38 **Spin:** At least one instance of spin occurred in the preprint, journal publication, or both in 30  
39 (45%) of the 67 studies. Spin occurred in both preprints and journal publications in 23 / 67  
40 (34%) studies, the preprint only in 5 (7%) studies, and the journal publications only in 2 (3%)  
41 studies (Table 4). Spin, in any category, was removed between the preprint and journal  
42 publication in 5 / 67(7%) studies; but added between the preprint and journal publication in 1  
43 (1%) study.  
44  
45  
46  
47  
48  
49  
50

51 Table 4 shows the categories of spin that occurred in preprints and their accompanying journal  
52 publications. Thirteen of 67 (19%) studies had changes in the type of spin present in the  
53 preprint versus the journal publication; 8 (12%) studies had at least one additional type of spin  
54  
55  
56  
57

1  
2  
3 present in the preprint, 2 (3%) studies had at least one additional type of spin present in the  
4 journal publication. Inappropriate extrapolation or recommendations was the most frequently  
5 occurring type of spin in both preprints and journal publications (11/67, 16% of studies). This  
6 type of spin and inappropriate interpretation given the study design occurred more frequently  
7 in preprints than journal publications.  
8  
9  
10  
11  
12

13  
14 An example of inappropriate interpretation was found in both the preprint and journal  
15 publication for an open-label non-randomised trial: the study investigated the effect of  
16 hydroxychloroquine (and in combination with azithromycin) on SARS-Co-V-2 viral load. They  
17 found a statistically significant viral load reduction at day 6; however, despite the small sample  
18 size and non-randomised study design, they concluded that their findings were “so significant”  
19 and recommended that “COVID-19 patients be treated with hydroxychloroquine and  
20 azithromycin to cure their infection and to limit the transmission of the virus to other people in  
21 order to curb the spread of COVID-19 in the world.”[28,29] An example of inappropriate  
22 extrapolation or recommendations that occurred in both the preprint and journal publication is  
23 a study that recommended specific policy approaches that were not tested in the study: “The  
24 UK will shortly enter a new phase of the pandemic, in which extensive testing, contact tracing  
25 and isolation will be required to keep the spread of COVID-19. For this to succeed, adherence  
26 must be improved.”[30,31] This observational study aimed to identify factors associated with  
27 individuals’ adherence to self-isolation and lockdown measures; the authors did not aim to  
28 investigate public adherence to testing recommendations or contact tracing, nor test their  
29 efficacy.  
30  
31  
32  
33  
34  
35  
36  
37  
38  
39  
40  
41  
42  
43  
44

45 **Sensitivity analysis:** The mean time between preprint posting and journal article publication  
46 was 65.4 days (range 0 – 271) (Supplemental file, Table S1). No preprints were posted after the  
47 revision, acceptance or publication dates for the accompanying journal publication. One  
48 preprint was posted the same date as the publication date. Discrepancies in study  
49 characteristics, outcome reporting and spin changed minimally when the analyses were  
50 conducted after removing 7 studies where the preprint was posted up to 7 days before the  
51  
52  
53  
54  
55  
56  
57  
58  
59  
60

1  
2  
3 revision, acceptance, or publication dates of the journal publication (Supplemental file, Tables  
4 S2 – S4).  
5  
6  
7

## 8 **DISCUSSION**

9  
10  
11  
12 *Principal findings.* Discrepancies between results reporting in preprints and their accompanying  
13 journal publications were frequent, but most often consisted of differences in content rather  
14 than a complete lack of reporting. Although infrequent, some outcomes that were not  
15 reported would have provided information that is critical for clinical decision making, such as  
16 clinical or harm outcomes that appeared only in the journal publication. The finding that  
17 outcomes reported in journal publications were measured over a longer time frame than  
18 outcomes reported in preprints indicates that the preprints were being used to publish  
19 preliminary or interim data. Preliminary or interim findings should be clearly labeled in  
20 preprints.  
21  
22  
23  
24  
25  
26  
27  
28  
29

30  
31 Although almost half of the preprints and journal publications contained spin, there was no  
32 clear difference in the types of spin. Spin is an enduring problem in the medical literature.[17]  
33 Our findings suggest that the identification and prevention of spin during journal peer review  
34 and editorial processes needs further improvement.  
35  
36  
37  
38  
39

40 More preprints reported funding source, author conflicts of interest and ethics approval than  
41 journal publications. These differences may be due to the screening requirements of medRxiv,  
42 the main source of preprints in our sample. When reported in both, journal publications  
43 included more detailed information on funding source, conflicts of interest of authors, and  
44 demographics of the population studied. Journal publications also included more tables and  
45 figures, and more extensive discussion of limitations. Some of these differences may be due to  
46 more comprehensive reporting requirements of journals. Other changes, such as more  
47 information on the study population or greater discussion of limitations, may be due to  
48 requests for additional information during peer review.  
49  
50  
51  
52  
53  
54  
55  
56  
57

1  
2  
3  
4  
5 Since preprints are posted without peer review and most journal publications in our sample  
6 were likely to be peer reviewed because they were identified from PubMed, our study  
7 indirectly investigates the impact of peer review on research articles. Articles may not have  
8 been peer-reviewed in similar ways. Authors may have made changes in their papers that were  
9 independent of peer review. We observed instances where peer review appeared to improve  
10 clarity (e.g. more detail on measurements)[32,33] or interpretation (e.g. requirement to  
11 present risk differences rather than just n (%) per treatment group).[34,35] Empirical evidence  
12 on the impact of peer review on manuscript quality is scarce. A study comparing submitted and  
13 published manuscripts found that the number of changes was relatively small and, similar to  
14 our study, primarily involved adding or clarifying information.[13] Some of the changes  
15 requested by peer reviewers were classified as having a negative impact on reporting, such as  
16 the addition of post-hoc subgroup analyses, statistical analyses that were not prespecified, or  
17 optimistic conclusions that did not reflect the trial results. In our sample, additions of subgroup  
18 and statistical analyses were common between preprints and journal publications, although we  
19 did not determine their appropriateness.  
20  
21  
22  
23  
24  
25  
26  
27  
28  
29  
30  
31  
32  
33  
34

35 A small proportion of medRxiv preprints, 14% at the end of the server's first year, were  
36 published as journal publications.[5] Therefore, our sample could be limited to studies that  
37 their authors deemed of high enough quality to be eligible for submission to a journal. Or, our  
38 sample could be limited to articles that had not been rejected by a journal. It is possible that  
39 peer review was eliminating publications that were fundamentally unsound, while more quickly  
40 processing studies that were sound and useful. Under pandemic conditions, articles may  
41 undergo fewer revisions. For example, peer reviewers may not suggest changes they think are  
42 less important, or editors may accept articles when they would have normally requested minor  
43 or major revisions. Thus, in this situation, peer review may mainly be playing the role of  
44 determining whether a study should be published in a journal or not.  
45  
46  
47  
48  
49  
50  
51  
52  
53  
54  
55  
56  
57  
58  
59  
60



1  
2  
3 There were minimal changes in the frequency and types of discrepancies between preprints  
4 and journal publications when we conducted a sensitivity analysis limiting our sample to studies  
5 where the preprints were published before the revision or acceptance date of the journal  
6 publication. This suggests that our findings are robust even when the sample is limited to  
7 preprints that likely had not gone through the peer review process. Given this finding and the  
8 observed similarities between preprints and their subsequent journal publications, our results  
9 suggest that peer review during the accelerated pace of COVID-19 research publication may not  
10 have provided much added value. The urgency related to dissemination of COVID-19 research  
11 could have led journals to fast-track publication by abbreviating editorial or peer review  
12 processes, resulting in fewer differences between preprints and journal publications.  
13  
14  
15  
16  
17  
18  
19  
20  
21  
22

23 *Comparison to other studies.* Our results are consistent with other studies finding small  
24 changes in reporting between preprints and journal publications. A number of these studies  
25 have been limited by failing to assess the addition or deletion of outcomes and by the use of  
26 composite “scores” that included items related to risk of bias and reporting. In contrast to our  
27 study, in a matched sample of preprints and journal publications, Carneiro et al. found journal  
28 publications more likely to have conflict of interest statement than preprints. In a textual  
29 analysis using 5 different algorithms, Klein et al. found very little difference in text between  
30 preprints and articles in a large matched sample.[9] We also noted preprints and journal  
31 publications that were almost identical, or had very minor differences such as corrections of  
32 typos. Other studies are limited by comparing unmatched samples of preprints and articles. In  
33 a comparison of 13 preprints and 16 articles on COVID-19 that were not reporting on the same  
34 studies, Kataoka et al. found no significant differences in risk of bias or spin in titles and  
35 conclusions.[11]  
36  
37  
38  
39  
40  
41  
42  
43  
44  
45  
46  
47  
48

49 We found similar changes in numerical results to Oikonomidi et al. who compared 66 preprint-  
50 article pairs for COVID-19 studies and found 25 (38%) of studies had changes.[12] Oikonomidi  
51 classified 16 of these changes as “important” based on 1) an increase or decrease by  $\geq 10\%$  of  
52 the initial value in any effect estimate and/or 2) a change in the p-value crossing the threshold  
53  
54  
55  
56  
57  
58  
59  
60

1  
2  
3 of 0.05, for any study outcome. We did not classify changes based on magnitude or threshold  
4 p-values because changes in numerical values may be related to other components of outcome  
5 reporting that we observed, such as changes to follow-up times or the use of different  
6 statistical tests. Furthermore, deviations from a p-value of 0.05 do not necessarily indicate  
7 changes in scientific or clinical significance. We examined changes in multiple components of  
8 outcome reporting that are considered essential, not just the numerical value of the  
9 outcome.[16,21] The diversity of studies included in our sample would make any  
10 categorizations of scientific or clinical significance difficult and subjective. For example, studies  
11 were observational and experimental and not all studies conducted statistical analysis. The  
12 topics of the studies included tests of clinical and public health interventions, associations of  
13 risk factors with COVID-19 symptoms, and ways to improve implementation of public health  
14 measures, such as social distancing.  
15  
16  
17  
18  
19  
20  
21  
22  
23  
24  
25  
26

27 *Strengths and limitations of this study.* We selected studies from the Cochrane COVID-19  
28 Register rather than conducting a literature search. However, as the Cochrane COVID-19  
29 Register has been optimized to identify COVID-19 clinical research for systematic reviews, we  
30 feel the search was comprehensive for identifying COVID-19 studies related to treatment or  
31 prevention that are most likely to have an impact on clinical practice or health policy. As a  
32 study-based register, all records related to a study are identified, enabling us to obtain all  
33 preprint and journal publication versions for a single study. Second, we compared the first  
34 version of the preprint with the final journal publication. We may have identified a different  
35 number of discrepancies if we compared later versions of the preprint with the journal  
36 publication. Third, although clinically important, our focus on COVID-19 research may not be  
37 representative of other types of research published as preprints, then journal publications. This  
38 study should be replicated in a sample of non-COVID related interventional and observational  
39 clinical studies. Future research could also include assessment of outcome reporting  
40 components and spin in preprints that have not been published in journals. Fourth, although  
41 we compared non-peer-reviewed preprints to their accompanying journal publications, we did  
42 not directly assess the effects of peer review. Finally, coders were not blinded to the source or  
43  
44  
45  
46  
47  
48  
49  
50  
51  
52  
53  
54  
55  
56  
57  
58  
59  
60

1  
2  
3 authors of preprints and journal publications as this was not feasible and there is no evidence  
4 that it would alter the decisions made.  
5  
6  
7

## 8 **CONCLUSIONS**

10 The COVID-19 preprints and their subsequent journal publications were largely similar in  
11 reporting of study characteristics, outcomes and spin in interpretation. However, given the  
12 urgent need for valid and reliable research on COVID-19 treatment and prevention, even a few  
13 important discrepancies could impact decision making. All COVID-19 studies, whether  
14 published as preprints or journal publications, should be critically evaluated for discrepancies in  
15 outcome reporting or spin, such as failure to report data on harms or overly optimistic  
16 conclusions.  
17  
18  
19  
20  
21  
22  
23  
24  
25  
26  
27  
28

29 Funding source: This study had no funding. Role of the funder: not applicable  
30  
31

32 Competing Interest Statement: All authors have completed the *Unified Competing Interest*  
33 *form* (available on request from the corresponding author) and declare: no support from any  
34 organisation for the submitted work; no financial relationships with any organisations that  
35 might have an interest in the submitted work in the previous three years. RF is a Cochrane  
36 employee and part of the development team for the Cochrane COVID-19 Study Register. No  
37 other authors declare any other relationships or activities that could appear to have influenced  
38 the submitted work.  
39  
40  
41  
42  
43  
44  
45  
46

47 Data access: LB had full access to all the data in the study and takes responsibility for the  
48 integrity of the data and the accuracy of the data analysis.  
49  
50  
51

52 Contributorship Statement: LB conceived the project, drafted the protocol, acquired data,  
53 conducted analysis, interpreted data, and drafted the paper. RL edited the protocol, acquired  
54  
55  
56  
57

1  
2  
3 data, conducted analysis, interpreted data, and revised the paper. LL edited the protocol,  
4 acquired data, conducted analysis, interpreted data, and revised the paper. KC edited the  
5 protocol, acquired data, conducted analysis, interpreted data, and revised the paper. SM  
6 edited the protocol, acquired data, conducted analysis, interpreted data, and revised the paper.  
7 MP edited the protocol, acquired data, conducted analysis, interpreted data, and revised the  
8 paper. QG edited the protocol, acquired data, conducted analysis, interpreted data, and  
9 revised the paper. LP edited the protocol, acquired data, conducted analysis, interpreted data,  
10 and revised the paper. SB edited the protocol, acquired data, conducted analysis, interpreted  
11 data, and revised the paper. JK edited the protocol, acquired data, conducted analysis,  
12 interpreted data, and revised the paper. RF edited the protocol, conducted the search,  
13 conducted analysis, interpreted data, and revised the paper. All authors (LB, RL, LL, KC, SM,  
14 MP, QG, LP, SB, JK, RF) have approved the final manuscript. LB serves as guarantor for all  
15 aspects of the work.  
16  
17  
18  
19  
20  
21  
22  
23  
24  
25  
26  
27  
28

29 Transparency declaration: LB affirms that the manuscript is an honest, accurate, and  
30 transparent account of the study being reported; that no important aspects of the study have  
31 been omitted; and that any discrepancies from the study as planned have been explained.  
32  
33  
34  
35

36 Data sharing statement: Data from this study is available in OSF project file (<https://osf.io/5ru8w/>).  
37  
38  
39  
40  
41  
42  
43  
44  
45  
46  
47  
48  
49  
50  
51  
52  
53  
54  
55  
56  
57  
58  
59  
60

## REFERENCES

- 1 All that's fit to preprint. *Nat Biotechnol* 2020;**38**:507–507. doi:10.1038/s41587-020-0536-x
- 2 Flanagan A, Fontanarosa PB, Bauchner H. Preprints involving medical research: do the benefits outweigh the challenges? *JAMA* 2020;**324**:1840. doi:10.1001/jama.2020.20674
- 3 Jung YE (Grace), Sun Y, Schluger NW. Effect and reach of medical articles posted on preprint servers during the COVID-19 pandemic. *JAMA Intern Med* Published Online First: 9 November 2020. doi:10.1001/jamainternmed.2020.6629
- 4 Kirkham JJ, Penfold NC, Murphy F, *et al*. Systematic examination of preprint platforms for use in the medical and biomedical sciences setting. *BMJ Open* 2020;**10**:e041849. doi:10.1136/bmjopen-2020-041849
- 5 Krumholz HM, Bloom T, Sever R, *et al*. Submissions and downloads of preprints in the first year of medRxiv. *JAMA* 2020;**324**:1903–5. doi:10.1001/jama.2020.17529
- 6 Krumholz HM, Bloom T, Ross J. Preprints can fill a void in times of rapidly changing science. STAT. 2020. <https://www.statnews.com/2020/01/31/preprints-fill-void-rapidly-changing-science/> (accessed 17 Dec 2020).
- 7 Bloom T. Shepherding preprints through a pandemic. *BMJ* 2020;**371**:m4703. doi:10.1136/bmj.m4703
- 8 Carneiro CFD, Queiroz VGS, Moulin TC, *et al*. Comparing quality of reporting between preprints and peer-reviewed articles in the biomedical literature. *Res Integr Peer Rev* 2020;**5**:16. doi:10.1186/s41073-020-00101-3
- 9 Klein M, Broadwell P, Farb SE, *et al*. Comparing published scientific journal articles to their pre-print versions. In: *Proceedings of the 16th ACM/IEEE-CS on Joint Conference on Digital Libraries*. New York, NY, USA: : Association for Computing Machinery 2016. 153–62. doi:10.1145/2910896.2910909
- 10 Nicolalde B, Añazco D, Mushtaq M, *et al*. Citations and publication rate of preprints on pharmacological interventions for COVID-19: the good, the bad and, the ugly. Version 2. *Res Sq* Published Online First: 8 September 2020. doi:10.21203/rs.3.rs-34689/v2
- 11 Kataoka Y, Oide S, Ariie T, *et al*. COVID-19 randomized controlled trials in medRxiv and PubMed. *Eur J Intern Med* 2020;**81**:97–9. doi:10.1016/j.ejim.2020.09.019
- 12 Oikonomidi T, Boutron I, Pierre O, *et al*. Changes in evidence for studies assessing interventions for COVID-19 reported in preprints: meta-research study. *BMC Med* 2020;**18**:402. doi:10.1186/s12916-020-01880-8

- 1  
2  
3 13 Hopewell S, Collins GS, Boutron I, *et al.* Impact of peer review on reports of randomised  
4 trials published in open peer review journals: retrospective before and after study. *BMJ*  
5 2014;**349**:g4145. doi:10.1136/bmj.g4145  
6  
7  
8 14 Lazarus C, Haneef R, Ravaud P, *et al.* Peer reviewers identified spin in manuscripts of  
9 nonrandomized studies assessing therapeutic interventions, but their impact on spin in  
10 abstract conclusions was limited. *J Clin Epidemiol* 2016;**77**:44–51.  
11 doi:10.1016/j.jclinepi.2016.04.012  
12  
13  
14 15 Chan A-W, Hróbjartsson A, Haahr MT, *et al.* Empirical evidence for selective reporting of  
15 outcomes in randomized trials: comparison of protocols to published articles. *JAMA*  
16 2004;**291**:2457. doi:10.1001/jama.291.20.2457  
17  
18  
19 16 Mathieu S, Boutron I, Moher D, *et al.* Comparison of registered and published primary  
20 outcomes in randomized controlled trials. *JAMA* 2009;**302**:977–84.  
21 doi:10.1001/jama.2009.1242  
22  
23  
24 17 Chiu K, Grundy Q, Bero L. ‘Spin’ in published biomedical literature: A methodological  
25 systematic review. *PLoS Biol* 2017;**15**:e2002173. doi:10.1371/journal.pbio.2002173  
26  
27  
28 18 Boutron I, Ravaud P. Misrepresentation and distortion of research in biomedical literature.  
29 *Proc Natl Acad Sci* 2018;**115**:2613–9. doi:10.1073/pnas.1710755115  
30  
31  
32 19 Bero L, Lawrence R, Leslie L, *et al.* Comparison of preprints with peer-reviewed publications  
33 on COVID-19: discrepancies in results reporting and conclusions. 2020.<https://osf.io/j62eu>  
(accessed 17 Dec 2020).  
34  
35  
36 20 Harris PA, Taylor R, Thielke R, *et al.* Research electronic data capture (REDCap): a metadata-  
37 driven methodology and workflow process for providing translational research informatics  
38 support. *J Biomed Inform* 2009;**42**:377–81. doi:10.1016/j.jbi.2008.08.010  
39  
40  
41 21 Zarin DA, Tse T, Williams RJ, *et al.* The ClinicalTrials.gov Results Database: update and key  
42 Issues. *N Engl J Med* 2011;**364**:852–60. doi:10.1056/NEJMsa1012065  
43  
44  
45 22 Borba MGS, Val FFA, Sampaio VS, *et al.* Effect of High vs Low Doses of Chloroquine  
46 Diphosphate as Adjunctive Therapy for Patients Hospitalized With Severe Acute Respiratory  
47 Syndrome Coronavirus 2 (SARS-CoV-2) Infection: A Randomized Clinical Trial. *JAMA Netw*  
48 *Open* 2020;**3**:e208857. doi:10.1001/jamanetworkopen.2020.8857  
49  
50  
51 23 Borba MGS, Val FFA, Sampaio VS, *et al.* Chloroquine diphosphate in two different dosages  
52 as adjunctive therapy of hospitalized patients with severe respiratory syndrome in the  
53 context of coronavirus (SARS-CoV-2) infection: Preliminary safety results of a randomized,  
54 double-blinded, phase IIb clinical trial (CloroCovid-19 Study). Version 1. *MedRxiv Prepr*  
55 2020;:2020.04.07.20056424. doi:10.1101/2020.04.07.20056424  
56  
57  
58  
59  
60

- 1  
2  
3 24 Tang W, Cao Z, Han M, *et al.* Hydroxychloroquine in patients with COVID-19: an open-label,  
4 randomized, controlled trial. Version 1. *MedRxiv Prepr* 2020;:2020.04.10.20060558.  
5 doi:10.1101/2020.04.10.20060558  
6  
7  
8 25 Tang W, Cao Z, Han M, *et al.* Hydroxychloroquine in patients with mainly mild to moderate  
9 coronavirus disease 2019: open label, randomised controlled trial. *BMJ* 2020;**369**:m1849.  
10 doi:10.1136/bmj.m1849  
11  
12 26 Weber AG, Chau AS, Egeblad M, *et al.* Nebulized in-line endotracheal dornase alfa and  
13 albuterol administered to mechanically ventilated COVID-19 patients: a case series.  
14 *MedRxiv Prepr* Published Online First: 15 May 2020. doi:10.1101/2020.05.13.20087734  
15  
16  
17 27 Weber AG, Chau AS, Egeblad M, *et al.* Nebulized in-line endotracheal dornase alfa and  
18 albuterol administered to mechanically ventilated COVID-19 patients: a case series. *Mol*  
19 *Med* 2020;**26**:91. doi:10.1186/s10020-020-00215-w  
20  
21  
22 28 Gautret P, Lagier J-C, Parola P, *et al.* Hydroxychloroquine and azithromycin as a treatment  
23 of COVID-19: results of an open-label non-randomized clinical trial. *medRxiv*  
24 2020;:2020.03.16.20037135. doi:10.1101/2020.03.16.20037135  
25  
26  
27 29 Gautret P, Lagier J-C, Parola P, *et al.* Hydroxychloroquine and azithromycin as a treatment  
28 of COVID-19: results of an open-label non-randomized clinical trial. *Int J Antimicrob Agents*  
29 2020;**56**:105949. doi:10.1016/j.ijantimicag.2020.105949  
30  
31  
32 30 Smith LE, Amlôt R, Lambert H, *et al.* Factors associated with adherence to self-isolation and  
33 lockdown measures in the UK; a cross-sectional survey. *MedRxiv Prepr*  
34 2020;:2020.06.01.20119040. doi:10.1101/2020.06.01.20119040  
35  
36  
37 31 Smith LE, Amlôt R, Lambert H, *et al.* Factors associated with adherence to self-isolation and  
38 lockdown measures in the UK: a cross-sectional survey. *Public Health* 2020;**187**:41–52.  
39 doi:10.1016/j.puhe.2020.07.024  
40  
41  
42 32 Chorin E, Wadhvani L, Magnani S, *et al.* QT interval prolongation and torsade de pointes in  
43 patients with COVID-19 treated with hydroxychloroquine/azithromycin. *Heart Rhythm*  
44 2020;**17**:1425–33. doi:10.1016/j.hrthm.2020.05.014  
45  
46  
47 33 Chorin E, Wadhvani L, Magnani S, *et al.* QT Interval Prolongation and Torsade De Pointes in  
48 Patients with COVID-19 treated with Hydroxychloroquine/Azithromycin. *MedRxiv Prepr*  
49 2020;:2020.04.27.20074583. doi:10.1101/2020.04.27.20074583  
50  
51  
52 34 Agarwal A, Mukherjee A, Kumar G, *et al.* Convalescent plasma in the management of  
53 moderate COVID-19 in India: an open-label parallel-arm phase II multicentre randomized  
54 controlled trial (PLACID Trial). Version 1. *MedRxiv Prepr* 2020;:2020.09.03.20187252.  
55 doi:10.1101/2020.09.03.20187252  
56  
57  
58  
59  
60

1  
2  
3  
4  
5  
6  
7  
8  
9  
10  
11  
12  
13  
14  
15  
16  
17  
18  
19  
20  
21  
22  
23  
24  
25  
26  
27  
28  
29  
30  
31  
32  
33  
34  
35  
36  
37  
38  
39  
40  
41  
42  
43  
44  
45  
46  
47  
48  
49  
50  
51  
52  
53  
54  
55  
56  
57  
58  
59  
60

35 Agarwal A, Mukherjee A, Kumar G, *et al.* Convalescent plasma in the management of moderate covid-19 in adults in India: open label phase II multicentre randomised controlled trial (PLACID Trial). *BMJ* 2020;**371**:m3939. doi:10.1136/bmj.m3939

For peer review only



**Table 1:** Discrepancies in Study Characteristics (n = 67 studies)

| Characteristic                  | No Discrepancies                                                  |                                                                     | Discrepancies                            |                                                      |                                                                                                                                                                                                                                                                                                                                                      |
|---------------------------------|-------------------------------------------------------------------|---------------------------------------------------------------------|------------------------------------------|------------------------------------------------------|------------------------------------------------------------------------------------------------------------------------------------------------------------------------------------------------------------------------------------------------------------------------------------------------------------------------------------------------------|
|                                 | Characteristics reported in both preprint and journal publication | Characteristics reported in neither preprint or journal publication | Characteristic reported in preprint only | Characteristics reported in journal publication only | Characteristic reported in both preprint and journal publication, but with discrepancies in content<br><br>Examples of discrepancies <sup>1</sup>                                                                                                                                                                                                    |
| <b>Title</b>                    | 47 (70%)                                                          | 0 (0%)                                                              | 0 (0%)                                   | 0 (0%)                                               | 20 (30%) <ul style="list-style-type: none"> <li>• Preprint includes study design in the title (n=4)</li> <li>• Journal publication includes study design in the title (n=5)</li> <li>• Change in study design description (n=5)</li> <li>• Change in population description (n=3)</li> <li>• Change in location description in both (n=3)</li> </ul> |
| <b>Authors</b>                  | 49 (73 %)                                                         | 0 (0%)                                                              | 0 (0%)                                   | 0 (0%)                                               | 18 (27%) <ul style="list-style-type: none"> <li>• Additional author(s) in preprint (n = 3)</li> <li>• Additional author(s) in journal publication (n = 9)</li> <li>• Change in author order (n = 6)</li> <li>• Change in spelling, wording, or order of author first/last names (n= 2)</li> </ul>                                                    |
| <b>Disclosed Funding source</b> | 44 (66%)                                                          | 3 (4%)                                                              | 8 (12%)                                  | 2 (3%)                                               | 10 (15%) <ul style="list-style-type: none"> <li>• Additional funding sources in journal publication (n = 4)</li> </ul>                                                                                                                                                                                                                               |

|                                                  |          |         |        |        |                                                                                                                                                                                                                                                                                                                                                                                                                                                                              |
|--------------------------------------------------|----------|---------|--------|--------|------------------------------------------------------------------------------------------------------------------------------------------------------------------------------------------------------------------------------------------------------------------------------------------------------------------------------------------------------------------------------------------------------------------------------------------------------------------------------|
|                                                  |          |         |        |        | <ul style="list-style-type: none"> <li>Funding statement in preprint provides more detail(n = 1)</li> <li>Funding statement in journal publication provides more detail(n = 2)</li> </ul>                                                                                                                                                                                                                                                                                    |
| <b>Conflict of Interest Disclosure statement</b> | 50 (75%) | 1 (1%)  | 5 (8%) | 1 (1%) | 10 (15%) <ul style="list-style-type: none"> <li>Additional conflicts reported in journal publication (n = 8)</li> <li>Additional conflicts reported in preprint (n = 1)</li> <li>Additional detail included in journal publication (n = 2)</li> </ul>                                                                                                                                                                                                                        |
| <b>Ethics approval</b>                           | 59 (88%) | 3 (5%)  | 1 (1%) | 0 (0%) | 4 (6%) <ul style="list-style-type: none"> <li>preprint contains approval number but journal publication does not (N=1); preprint states approval was waived and journal publication states it was not needed (n=1); preprint contains no information on ethics approval, while journal publication describes the approvals (n = 1); preprints state consent was approved prior to sample collection while article states it was approved from next of kin (n = 1)</li> </ul> |
| <b>Location of study</b>                         | 63 (94%) | 4 (6 %) | 0 (0%) | 0 (0%) | 0 (0%)                                                                                                                                                                                                                                                                                                                                                                                                                                                                       |
| <b>Number of participants</b>                    | 61 (91%) | 0 (0%)  | 0 (0%) | 0 (0%) | 6 (9%) <ul style="list-style-type: none"> <li>Journal publication has larger analytic</li> </ul>                                                                                                                                                                                                                                                                                                                                                                             |

|                                 |          |        |        |        |                                                                                                                                                                                                                                                                                                                                                                                            |
|---------------------------------|----------|--------|--------|--------|--------------------------------------------------------------------------------------------------------------------------------------------------------------------------------------------------------------------------------------------------------------------------------------------------------------------------------------------------------------------------------------------|
|                                 |          |        |        |        | sample size than preprint (n = 2); Journal publication has smaller analytic sample size than preprint (n=1); different numbers of patients recruited, but same number randomized; 284 patients included in preprint, 267 in journal publication (n = 1); numbers do not match for any sampling or analysis (n = 1); typographical error (n = 1)                                            |
| <b>Participant demographics</b> | 38 (58%) | 3 (4%) | 0 (0%) | 1 (1%) | 25 (37%) <ul style="list-style-type: none"> <li>Journal publication includes additional demographic categories (n=10)</li> <li>Preprint includes additional demographic categories (n = 4)</li> <li>Preprint and journal publication report different values for the same demographic characteristics (n = 11)</li> <li>Demographic data report using different metrics (n = 6)</li> </ul> |
| <b>Tables and Figures</b>       | 18 (27%) | 0 (0%) | 0 (0%) | 0 (0%) | 49 (73%) <ul style="list-style-type: none"> <li>Journal publication includes additional tables/figures (n=25)</li> <li>Preprint includes additional tables/figures (n=10)</li> </ul>                                                                                                                                                                                                       |

|                                  |          |         |        |        |                                                                                                                                                                                                                                                                                                                                                                             |
|----------------------------------|----------|---------|--------|--------|-----------------------------------------------------------------------------------------------------------------------------------------------------------------------------------------------------------------------------------------------------------------------------------------------------------------------------------------------------------------------------|
|                                  |          |         |        |        | <ul style="list-style-type: none"> <li>• Additional data in journal publication tables (n = 14)</li> <li>• Additional data in preprint tables/figures (n = 6)</li> <li>• Change in order of tables/figures (n = 4)</li> <li>• Change in metrics (eg. mean vs. median) (n = 15)</li> <li>• Change in labels (n = 5)</li> <li>• Numbers reported differed (n = 16)</li> </ul> |
| <b>Discussion of limitations</b> | 27 (40%) | 7 (11%) | 0 (0%) | 2 (3%) | 31 (46%) <ul style="list-style-type: none"> <li>• More limitations listed in journal publication than preprint (n=28)</li> <li>• More limitations listed in preprint than journal publication (n=1)</li> </ul>                                                                                                                                                              |

<sup>1</sup> Ns do not add to number of discrepancies between preprints and journal publications as some studies could have more than one discrepancy and not all discrepancies have been included as examples.

**Table 2:** Discrepancies in Number of Outcomes Reported (N= 67 studies)

| Type of Discrepancy                                 | Number (%) of studies with at least 1 outcome that was reported only in the preprint or journal publication (n=67) | Number and description of outcomes across all studies that were reported only in the preprint or journal publication                                                                                                                                                                                                                                                                                                                                                                                                                                                                                                                                                                                                                                                                                                                                                                                                                                                                                                                      |
|-----------------------------------------------------|--------------------------------------------------------------------------------------------------------------------|-------------------------------------------------------------------------------------------------------------------------------------------------------------------------------------------------------------------------------------------------------------------------------------------------------------------------------------------------------------------------------------------------------------------------------------------------------------------------------------------------------------------------------------------------------------------------------------------------------------------------------------------------------------------------------------------------------------------------------------------------------------------------------------------------------------------------------------------------------------------------------------------------------------------------------------------------------------------------------------------------------------------------------------------|
| <b>Outcome reported in journal publication only</b> | 15 (22%)                                                                                                           | N = 19 (numbering indicates unique studies, lettering indicates outcomes from the same study) <ol style="list-style-type: none"> <li>1a) Treatment-associated toxicities</li> <li>1b) Adverse reactions</li> <li>2) Survival at ICU discharge</li> <li>3) Creatine phosphokinase</li> <li>4) Radiographic scale for acute respiratory distress syndrome</li> <li>5) Time to negative swab</li> <li>6) Time to RT-PCR negativity</li> <li>7) Clinical outcomes at discharge</li> <li>8) Ventilator status of those remaining hospitalized at end of follow up</li> <li>9a) Secondary composite - cardiovascular complications</li> <li>9b) Acute renal failure</li> <li>10) Creatinine phosphokinase</li> <li>11) Sequential organ failure assessment score</li> <li>12) Length of stay</li> <li>13) WHO Clinical Progression Scale</li> <li>14a) sCD14 levels related to corticoid treatment</li> <li>14b) Hospital Stay</li> <li>14c) Onset of symptoms</li> <li>15) Mechanical ventilation or all-cause mortality at 21 days</li> </ol> |
| <b>Outcome reported in preprint only</b>            | 8 (12%)                                                                                                            | N = 17 (numbering indicates unique studies, lettering indicates outcomes from the same study) <ol style="list-style-type: none"> <li>1a) Oxygen support need</li> <li>1b) Invasive mechanical ventilation need</li> <li>1c) ICU need</li> <li>1d) Need for inotropics</li> <li>1e) Naso/oropharyngeal swab viral clearance</li> <li>2a) Final lymphocyte (cell/mm<sup>3</sup>)</li> </ol>                                                                                                                                                                                                                                                                                                                                                                                                                                                                                                                                                                                                                                                 |

|  |  |                                                                                                                                                                                                                                                                                                                                                                                                                                                                                                                                                                                              |
|--|--|----------------------------------------------------------------------------------------------------------------------------------------------------------------------------------------------------------------------------------------------------------------------------------------------------------------------------------------------------------------------------------------------------------------------------------------------------------------------------------------------------------------------------------------------------------------------------------------------|
|  |  | <p>2b) Final CRP (mg/L)</p> <p>3a) Negative conversion of SARS-CoV-2 by 28 days</p> <p>3b) Negative conversion rate at 4-, 7-, 10-, 14- or 21-day</p> <p>3c) Changes of CRP values and blood lymphocyte count</p> <p>3d) Rate of symptoms alleviation within 28-day</p> <p>3e) Safety endpoints</p> <p>4) QTc <math>\geq</math> 470 ms</p> <p>5) Cumulative virus clearance rate vs different antiviral regimes in [a] all patients and [b] patients with moderate illness</p> <p>6) Adverse events</p> <p>7) Composite cardiovascular and renal failure</p> <p>8) Nosocomial infections</p> |
|--|--|----------------------------------------------------------------------------------------------------------------------------------------------------------------------------------------------------------------------------------------------------------------------------------------------------------------------------------------------------------------------------------------------------------------------------------------------------------------------------------------------------------------------------------------------------------------------------------------------|

For peer review only

**Table 3:** Discrepancies in Components of Results Reporting for Outcomes Reported in Both Preprints and Journal Publications (N= 67 studies; 258 outcomes)

| Type of Discrepancy                  | Number (%) of studies with at least 1 discrepancy between the preprint and journal publication (n=67) | Number (%) of outcomes across all studies that were discrepant between the preprint and journal publication (n=258) | Descriptive Examples <sup>1</sup>                                                                                                                                                                                                                                                                                                                                        |
|--------------------------------------|-------------------------------------------------------------------------------------------------------|---------------------------------------------------------------------------------------------------------------------|--------------------------------------------------------------------------------------------------------------------------------------------------------------------------------------------------------------------------------------------------------------------------------------------------------------------------------------------------------------------------|
| <b>Outcome measurement</b>           | 6 (9%)                                                                                                | 8 (3%)                                                                                                              | <ul style="list-style-type: none"> <li>- Journal publication contains more detail on how outcome was measured compared to preprint (n=3)</li> <li>- Journal publication reports an additional or different measurement than the one used for the same outcome in the preprint (e.g., preprint reports 4 adverse events, journal publication reports 12) (n=4)</li> </ul> |
| <b>Units of measurement</b>          | 3 (4%)                                                                                                | 3 (1%)                                                                                                              | <ul style="list-style-type: none"> <li>- e.g., journal publication reports events, total and percentage for mortality, preprint reports only percentage; median (IQR) reported in journal publication, mean (SD) in preprint</li> </ul>                                                                                                                                  |
| <b>Timepoint assessment was made</b> | 10 (15%)                                                                                              | 24 (9%)                                                                                                             | <ul style="list-style-type: none"> <li>- Journal publication reports outcomes measured over a longer timepoint than preprint (n=13)</li> <li>- Journal publication reports additional interim time points compared to preprint (n=3)</li> </ul>                                                                                                                          |
| <b>Numerical values reported</b>     | 24 (36%)                                                                                              | 52 (20%)                                                                                                            | <ul style="list-style-type: none"> <li>- Differences in number of events or measurement values reported (n=17)</li> <li>- Differences in numbers of participants or denominators (n = 5)</li> <li>-</li> <li>- More adverse events reported in journal publication than preprint (n = 4)</li> </ul>                                                                      |

|                                                                  |          |          |                                                                                                                                                                                                                                                                                                                                                                                         |
|------------------------------------------------------------------|----------|----------|-----------------------------------------------------------------------------------------------------------------------------------------------------------------------------------------------------------------------------------------------------------------------------------------------------------------------------------------------------------------------------------------|
| <b>Finding of statistical significance</b>                       | 11 (16%) | 16 (6%)  | <ul style="list-style-type: none"> <li>- Different p-value reported with no change in significance (n=3)</li> <li>- Different p-value reported with change in significance; significant result reported in journal publication (n=1)</li> <li>- In multivariate models, journal publication and preprint report different variables as being statistically significant (n=2)</li> </ul> |
| <b>Statistical tests performed</b>                               | 17 (25%) | 31 (12%) | <ul style="list-style-type: none"> <li>- Journal publication contains additional statistical analysis compared to preprint (n=7)</li> <li>- Journal publication uses different statistical adjustments compared to preprint (n=7)</li> <li>- Journal publication and preprint use different statistical tests for same data (n=3)</li> </ul>                                            |
| <b>Subgroup analyses conducted</b>                               | 14 (21%) | 24 (9%)  | <ul style="list-style-type: none"> <li>- Journal publication includes subgroup analysis not included in preprint (n=6)</li> <li>- Journal publication finds statistically significant interaction for subgroup, preprint does not (n=1)</li> </ul>                                                                                                                                      |
| <b>Identifying the outcome as a primary or secondary outcome</b> | 1 (1%)   | 3 (1%)   | <ul style="list-style-type: none"> <li>- e.g., preprint identifies the primary endpoint as safety; journal publication adds the secondary endpoint of exploration of efficacy</li> </ul>                                                                                                                                                                                                |

<sup>1</sup> Ns do not add to number of reported discrepancies as some studies could have more than one discrepancy and not all discrepancies have been included as examples.



Table 4: Categories of Spin in Preprints and Journal Publications (n = 67 studies)

| Spin Categories and Subcategories <sup>1</sup>                                                                                        | No Spin<br>N (%) | Occurred in<br>preprint and journal<br>publication<br>N (%) | Occurred in<br>preprint only<br>N (%) | Occurred in<br>journal<br>publication only<br>N (%) |
|---------------------------------------------------------------------------------------------------------------------------------------|------------------|-------------------------------------------------------------|---------------------------------------|-----------------------------------------------------|
| <b>Any Category of Spin<sup>2</sup></b>                                                                                               | <b>37 (55%)</b>  | <b>23 (34%)</b>                                             | <b>5 (7%)</b>                         | <b>2 (3%)</b>                                       |
| <b>Category</b>                                                                                                                       |                  |                                                             |                                       |                                                     |
| <b>Inappropriate interpretation<br/>given study design<sup>3</sup></b>                                                                | <b>55 (82%)</b>  | <b>7 (10%)</b>                                              | <b>4 (6%)</b>                         | <b>1 (1%)</b>                                       |
| Subcategory                                                                                                                           |                  |                                                             |                                       |                                                     |
| Claiming causality in non-<br>randomized studies                                                                                      | 62 (93%)         | 4 (6%)                                                      | 1 (1%)                                | 0 (0%)                                              |
| Interpreting a lack of statistical<br>significance as equivalence                                                                     | 66 (99%)         | 0 (0%)                                                      | 0 (0%)                                | 1 (1%)                                              |
| Interpreting a lack of statistical<br>significance of harm measures<br>as safety                                                      | 65 (97%)         | 1 (1.5%)                                                    | 0 (0%)                                | 1 (1.5%)                                            |
| Claim of any significant<br>difference despite lack of<br>statistical test                                                            | 67 (100%)        | 0 (0%)                                                      | 0 (0%)                                | 0 (0%)                                              |
| Other                                                                                                                                 | 61 (91%)         | 2 (3%)                                                      | 4 (6%)                                | 0 (0%)                                              |
|                                                                                                                                       |                  |                                                             |                                       |                                                     |
| <b>Inappropriate extrapolations<br/>or recommendations</b>                                                                            | <b>52 (78%)</b>  | <b>13 (19%)</b>                                             | <b>2 (3%)</b>                         | <b>0 (0%)</b>                                       |
| Subcategory                                                                                                                           |                  |                                                             |                                       |                                                     |
| Suggestion that the treatment<br>or test is more clinically<br>relevant or useful than is<br>justified given the study design.        | 60 (90%)         | 6 (9%)                                                      | 1 (1%)                                | 0(0%)                                               |
| Recommendations made to<br>population groups / contexts<br>outside of those investigated.                                             | 63 (94%)         | 3 (5%)                                                      | 1 (1%)                                | 0 (0%)                                              |
| (Observational) Expressing<br>confidence in a treatment or<br>test without suggesting the<br>need for further confirmatory<br>studies | 66 (99%)         | 0 (0%)                                                      | 1 (1%)                                | 0 (0%)                                              |
| (Observational) Making<br>recommendations without<br>stating an RCT should be done<br>to validate the<br>recommendation               | 65 (97%)         | 2 (3%)                                                      | 0 (0%)                                | 0 (0%)                                              |
| Other                                                                                                                                 | 63 (94%)         | 3 (5%)                                                      | 1 (1%)                                | 0 (0%)                                              |
|                                                                                                                                       |                  |                                                             |                                       |                                                     |

| <b>Selective focusing on positive results or more favorable data presentation</b>                                         | <b>54 (81%)</b> | <b>8 (12%)</b> | <b>2 (3%)</b> | <b>3 (4%)</b> |
|---------------------------------------------------------------------------------------------------------------------------|-----------------|----------------|---------------|---------------|
| Subcategory                                                                                                               |                 |                |               |               |
| Discussing only significant (non-primary) results to distract from non-significant (primary results)                      | 66 (99%)        | 0 (0%)         | 1 (1%)        | 0 (0%)        |
| Omitting non-significant results from Abstract/Discussion/Conclusion                                                      | 65 (97%)        | 1 (1.5%)       | 0 (0%)        | 1 (1.5%)      |
| Claiming significant effects for non-significant results                                                                  | 67 (100%)       | 0 (0%)         | 0 (0%)        | 0 (0%)        |
| Acknowledge statistically nonsignificant results for the primary outcome but emphasize the beneficial effect of treatment | 66 (99%)        | 1 (1%)         | 0 (0%)        | 0 (0%)        |
| Describing non-significant results as "trending towards significance"                                                     | 66 (99%)        | 1 (1%)         | 0 (0%)        | 0 (0%)        |
| Mentioning adverse events in the abstract/discussion/conclusion but minimizing their potential effect or importance.      | 64 (96%)        | 2 (3%)         | 1 (1%)        | 0 (0%)        |
| Misleading description of study design as one that is more robust                                                         | 67 (100%)       | 0 (0%)         | 0 (0%)        | 0 (0%)        |
| No considerations of the limitations of the study                                                                         | 64 (96%)        | 3 (4%)         | 0 (0%)        | 0 (0%)        |
| Use of linguistic spin                                                                                                    | 66 (99%)        | 0 (0%)         | 0 (0%)        | 1 (1%)        |
| Other                                                                                                                     | 62 (93%)        | 1 (1%)         | 2 (3%)        | 2 (3%)        |

<sup>1</sup> Subcategories of spin are not mutually exclusive; a preprint or journal publications could contain multiple subcategories of spin within a category. Preprints and journal publications could contain different subcategories of spin within a category.

<sup>2</sup> This row shows counts of at least one instance of spin in any category. Column category and subcategory counts add to greater than any occurrence of spin because multiple categories and subcategories of spin could occur within a preprint or article publication. Row percents do not add to 100 due to rounding.

<sup>3</sup> Row percents may not add to 100 due to rounding

1  
2  
3 **Figure legend:**  
4  
5

6  
7 **Figure 1. Flowchart of study inclusion**  
8  
9  
10  
11  
12  
13  
14  
15  
16  
17  
18  
19  
20  
21  
22  
23  
24  
25  
26  
27  
28  
29  
30  
31  
32  
33  
34  
35  
36  
37  
38  
39  
40  
41  
42  
43  
44  
45  
46  
47  
48  
49  
50  
51  
52  
53  
54  
55  
56  
57  
58  
59  
60

For peer review only

1  
2  
3  
4  
5  
6  
7  
8  
9  
10  
11  
12  
13  
14  
15  
16  
17  
18  
19  
20  
21  
22  
23  
24  
25  
26  
27  
28  
29  
30  
31  
32  
33  
34  
35  
36  
37  
38  
39  
40  
41  
42  
43  
44  
45  
46  
47  
48  
49  
50  
51  
52  
53  
54  
55  
56  
57  
58  
59  
60

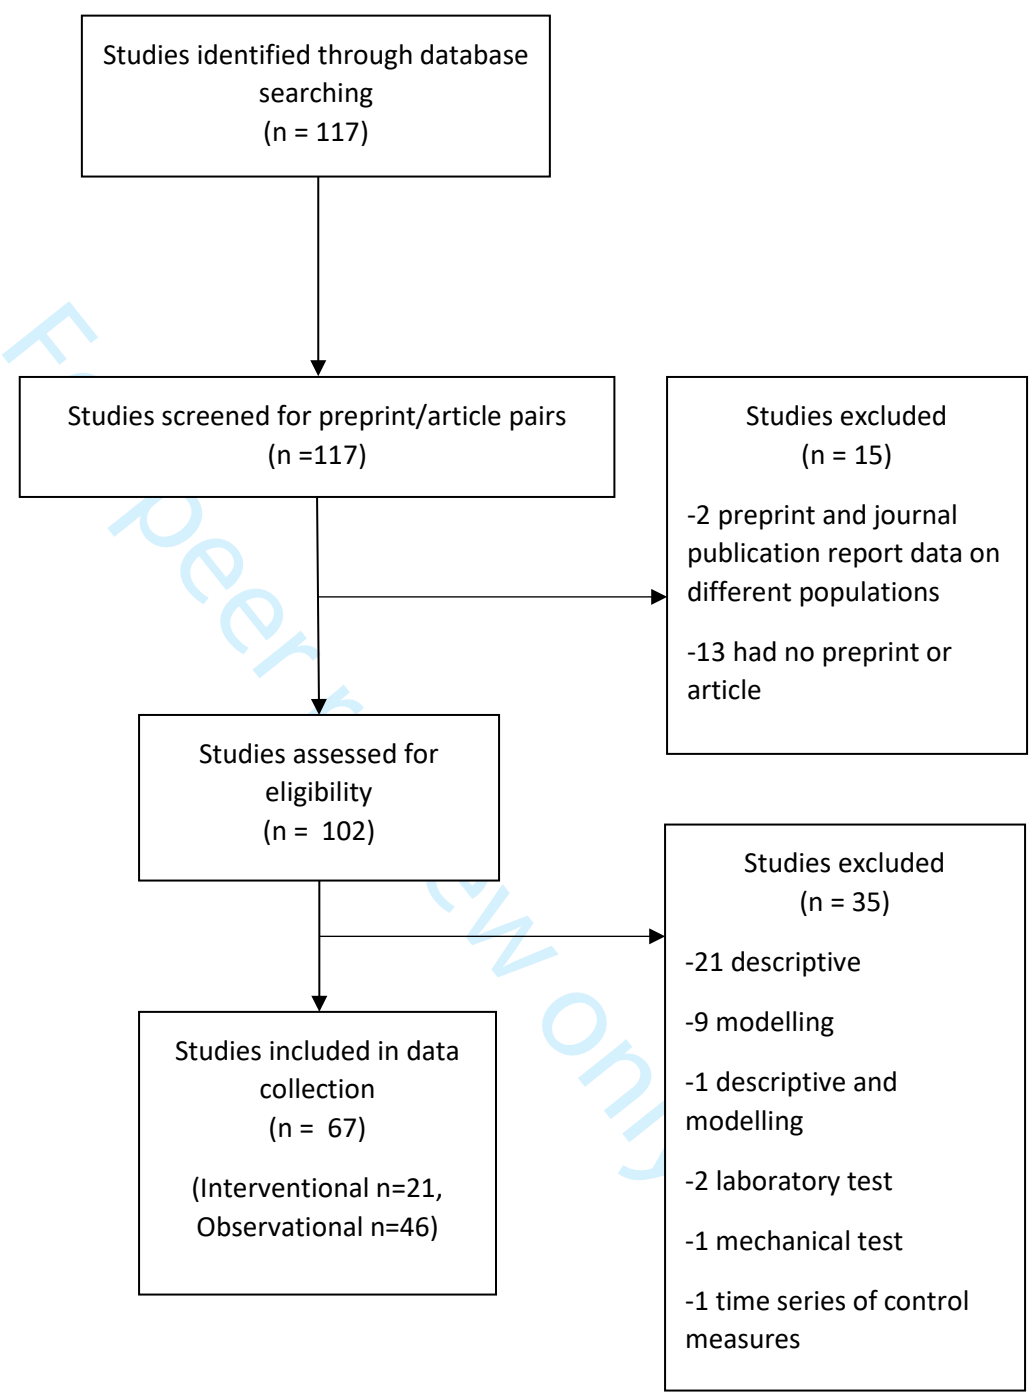

1  
2  
3 **Supplemental Files**  
4  
5

6 **Table S1: Timing of preprint to journal publication (days)**

7 **Table S2: Sensitivity Analysis of Discrepancies in Study Characteristics**

8 **Table S3: Sensitivity Analysis of Discrepancies in Outcome Reporting**

9 **Table S4: Sensitivity Analysis of Categories of Spin in Preprints and Journal**  
10 **Publications**  
11  
12  
13  
14  
15  
16  
17  
18  
19  
20  
21  
22  
23  
24  
25  
26  
27  
28  
29  
30  
31  
32  
33  
34  
35  
36  
37  
38  
39  
40  
41  
42  
43  
44  
45  
46  
47  
48  
49  
50  
51  
52  
53  
54  
55  
56  
57  
58  
59  
60

For peer review only

**Table S1: Timing of preprint to journal publication (days)**

|                                                                      | <b>Days from preprint to published, mean (range)</b> |
|----------------------------------------------------------------------|------------------------------------------------------|
| <b>All Studies (n=67)</b>                                            | 65.4 (0 - 271)                                       |
| <b>Subgroup: Preprint posted before submission to journal (n=32)</b> | 87.1 (10 - 271)                                      |
| <b>Subgroup: Preprint posted after submission to journal (n=27)</b>  | 52.2 (0 - 120)                                       |

**Table S2: Sensitivity Analysis of Discrepancies in Study Characteristics (n=60) <sup>a</sup>**

|                                  | No Discrepancies             |                                 | Discrepancies                                      |                                       |                                                     |
|----------------------------------|------------------------------|---------------------------------|----------------------------------------------------|---------------------------------------|-----------------------------------------------------|
|                                  | Reported in Both,<br>No. (%) | Reported in Neither,<br>No. (%) | Reported in Both<br>With Discrepancies,<br>No. (%) | Reported in Preprint<br>Only, No. (%) | Reported in Journal<br>Publication Only, No.<br>(%) |
| <b>Title</b>                     | 44 (73)                      | 0 (0)                           | 16 (27)                                            | 0 (0)                                 | 0 (0)                                               |
| <b>Authors</b>                   | 43 (72)                      | 0 (0)                           | 17 (28)                                            | 0 (0)                                 | 0 (0)                                               |
| <b>Disclosed Funding Source</b>  | 39 (65)                      | 3 (5)                           | 10 (17)                                            | 6 (10)                                | 2 (3)                                               |
| <b>COI Disclosure Statement</b>  | 45 (75)                      | 1 (2)                           | 9 (15)                                             | 4 (7)                                 | 1 (2)                                               |
| <b>Ethics Approval</b>           | 54 (90)                      | 2 (3)                           | 4 (7)                                              | 0 (0)                                 | 0 (0)                                               |
| <b>Location of Study</b>         | 56 (93)                      | 4 (7)                           | 0 (0)                                              | 0 (0)                                 | 0 (0)                                               |
| <b>Number of Participants</b>    | 54 (90)                      | 0 (0)                           | 6 (10)                                             | 0 (0)                                 | 0 (0)                                               |
| <b>Participant Demographics</b>  | 34 (57)                      | 3 (5)                           | 22 (37)                                            | 0 (0)                                 | 1 (2)                                               |
| <b>Tables and Figures</b>        | 15 (25)                      | 0 (0)                           | 45 (75)                                            | 0 (0)                                 | 0 (0)                                               |
| <b>Discussion of Limitations</b> | 23 (38)                      | 6 (10)                          | 30 (50)                                            | 0 (0)                                 | 1 (2)                                               |

<sup>a</sup> Studies that had a preprint posted on-or-after the date of revision, acceptance, or publication were removed. This removed 1 study. Due to differences in journal reporting of these dates, there was overlap in those studies and no comparison in others. Therefore, we expanded the studies removed to include those with preprints posted 1-7 days before the date of revision, acceptance, or publication, thus removing 7 studies from the sensitivity analysis.

**Table S3: Sensitivity Analysis of Discrepancies in Outcome Reporting (n=60)<sup>a</sup>**

|                                                                  | <b>Number (%) of studies with at least 1 discrepancy<br/>n=60</b> | <b>Number (%) of Outcomes<br/>n=242</b> |
|------------------------------------------------------------------|-------------------------------------------------------------------|-----------------------------------------|
| <b>Outcome in journal publication only</b>                       | 14 (23)                                                           | 18 (7)                                  |
| <b>Outcome in preprint only</b>                                  | 7 (12)                                                            | 16 (7)                                  |
| <b>Outcome measurement</b>                                       | 5 (8)                                                             | 7 (3)                                   |
| <b>Units of measurement</b>                                      | 3 (5)                                                             | 3 (1)                                   |
| <b>Timepoint assessment was made</b>                             | 10 (17)                                                           | 24 (10)                                 |
| <b>Numerical values reported</b>                                 | 23 (38)                                                           | 49 (20)                                 |
| <b>Finding of statistical significance</b>                       | 11 (18)                                                           | 16 (7)                                  |
| <b>Statistical tests performed</b>                               | 16 (27)                                                           | 30 (12)                                 |
| <b>Subgroup analyses conducted</b>                               | 13 (22)                                                           | 23 (10)                                 |
| <b>Identifying the outcome as a primary or secondary outcome</b> | 1 (2)                                                             | 3 (1)                                   |

<sup>a</sup> Studies that had a preprint posted on-or-after the date of revision, acceptance, or publication were removed. This removed 1 study. Due to differences in journal reporting of these dates, there was overlap in those studies and no comparison in others. Therefore, we expanded the studies removed to include those with preprints posted 1-7 days before the date of revision, acceptance, or publication, thus removing 7 studies from the sensitivity analysis.



**Table S4: Sensitivity Analysis of Categories of Spin in Preprints and Journal Publications (n=60) <sup>a</sup>**

|                                                                                                                           | <b>Neither, No. (%)</b> | <b>Both, No. (%)</b> | <b>Preprint Only, No. (%)</b> | <b>Journal Publication Only, No. (%)</b> |
|---------------------------------------------------------------------------------------------------------------------------|-------------------------|----------------------|-------------------------------|------------------------------------------|
| <b>Inappropriate interpretation given study design</b>                                                                    | <b>49 (82)</b>          | <b>6 (10)</b>        | <b>4 (7)</b>                  | <b>1 (2)</b>                             |
| Claiming causality in non-randomized studies                                                                              | 56 (93)                 | 3 (5)                | 1 (2)                         | 0 (0)                                    |
| Interpreting a lack of statistical significance as equivalence                                                            | 59 (98)                 | 0 (0)                | 0 (0)                         | 1 (2)                                    |
| Interpreting a lack of statistical significance of harm measures as safety                                                | 58 (97)                 | 1 (2)                | 0 (0)                         | 1 (2)                                    |
| Claim of any significant difference despite lack of statistical test                                                      | 60 (100)                | 0 (0)                | 0 (0)                         | 0 (0)                                    |
| Other                                                                                                                     | 54 (90)                 | 2 (3)                | 4 (7)                         | 0 (0)                                    |
|                                                                                                                           |                         |                      |                               |                                          |
| <b>Inappropriate extrapolations or recommendations</b>                                                                    | <b>46 (77)</b>          | <b>12 (20)</b>       | <b>2 (3)</b>                  | <b>0 (0)</b>                             |
| Suggestion that the treatment or test is more clinically relevant or useful than is justified given the study design.     | 54 (90)                 | 5 (8)                | 1 (2)                         | 0 (0)                                    |
| Recommendations made to population groups / contexts outside of those investigated.                                       | 56 (93)                 | 3 (5)                | 1 (2)                         | 0 (0)                                    |
| (Observational) Expressing confidence in a treatment or test without suggesting the need for further confirmatory studies | 59 (98)                 | 0 (0)                | 1 (2)                         | 0 (0)                                    |
| (Observational) Making recommendations without stating an RCT should be done to validate the recommendation               | 59 (98)                 | 1 (2)                | 0 (0)                         | 0 (0)                                    |
| Other                                                                                                                     | 56 (93)                 | 3 (5)                | 1 (2)                         | 0 (0)                                    |
|                                                                                                                           |                         |                      |                               |                                          |
| <b>Selective focusing on positive results or more favorable data presentation</b>                                         | <b>48 (80)</b>          | <b>7 (12)</b>        | <b>2 (3)</b>                  | <b>3 (5)</b>                             |
| Discussing only significant (non-primary) results to distract from non-significant (primary results)                      | 59 (98)                 | 0 (0)                | 1 (2)                         | 0 (0)                                    |
| Omitting non-significant results from Abstract/Discussion/Conclusion                                                      | 58 (97)                 | 1 (2)                | 0 (0)                         | 1 (2)                                    |
| Claiming significant effects for non-significant results                                                                  | 60 (100)                | 0 (0)                | 0 (0)                         | 0 (0)                                    |
| Acknowledge statistically nonsignificant results for the primary outcome but emphasize the beneficial effect of treatment | 59 (98)                 | 1 (2)                | 0 (0)                         | 0 (0)                                    |

|                                                                                                                      |          |       |       |       |
|----------------------------------------------------------------------------------------------------------------------|----------|-------|-------|-------|
| Describing non-significant results as "trending towards significance"                                                | 59 (98)  | 1 (2) | 0 (0) | 0 (0) |
| Mentioning adverse events in the abstract/discussion/conclusion but minimizing their potential effect or importance. | 58 (97)  | 1 (2) | 1 (2) | 0 (0) |
| Misleading description of study design as one that is more robust                                                    | 60 (100) | 0 (0) | 0 (0) | 0 (0) |
| No considerations of the limitations of the study                                                                    | 58 (97)  | 2 (3) | 0 (0) | 0 (0) |
| Use of linguistic spin                                                                                               | 59 (98)  | 0 (0) | 0 (0) | 1 (2) |
| Other                                                                                                                | 55 (92)  | 1 (2) | 2 (3) | 2 (3) |

<sup>a</sup> Studies that had a preprint posted on-or-after the date of revision, acceptance, or publication were removed. This removed 1 study. Due to differences in journal reporting of these dates, there was overlap in those studies and no comparison in others. Therefore, we expanded the studies removed to include those with preprints posted 1-7 days before the date of revision, acceptance, or publication, thus removing 7 studies from the analysis

## STROBE Statement—checklist of items that should be included in reports of observational studies

|                           | Item No | Recommendation                                                                                                                                                                                                                                                                                                                                                                                                                                                         | Included                                                                                              | Reference                                                                                                                               |
|---------------------------|---------|------------------------------------------------------------------------------------------------------------------------------------------------------------------------------------------------------------------------------------------------------------------------------------------------------------------------------------------------------------------------------------------------------------------------------------------------------------------------|-------------------------------------------------------------------------------------------------------|-----------------------------------------------------------------------------------------------------------------------------------------|
| <b>Title and abstract</b> | 1       | (a) Indicate the study's design with a commonly used term in the title or the abstract                                                                                                                                                                                                                                                                                                                                                                                 | Yes                                                                                                   | in abstract                                                                                                                             |
|                           |         | (b) Provide in the abstract an informative and balanced summary of what was done and what was found                                                                                                                                                                                                                                                                                                                                                                    | Yes                                                                                                   | Page 5                                                                                                                                  |
| <b>Introduction</b>       |         |                                                                                                                                                                                                                                                                                                                                                                                                                                                                        |                                                                                                       |                                                                                                                                         |
| Background/rationale      | 2       | Explain the scientific background and rationale for the investigation being reported                                                                                                                                                                                                                                                                                                                                                                                   | Yes                                                                                                   | Pages 6-7                                                                                                                               |
| Objectives                | 3       | State specific objectives, including any prespecified hypotheses                                                                                                                                                                                                                                                                                                                                                                                                       | Yes                                                                                                   | Page 7, para 2                                                                                                                          |
| <b>Methods</b>            |         |                                                                                                                                                                                                                                                                                                                                                                                                                                                                        |                                                                                                       |                                                                                                                                         |
| Study design              | 4       | Present key elements of study design early in the paper                                                                                                                                                                                                                                                                                                                                                                                                                | Yes                                                                                                   | Presented as subheadings in methods section                                                                                             |
| Setting                   | 5       | Describe the setting, locations, and relevant dates, including periods of recruitment, exposure, follow-up, and data collection                                                                                                                                                                                                                                                                                                                                        | Yes                                                                                                   | Abstract and pages 8-9                                                                                                                  |
| Participants              | 6       | (a) <i>Cohort study</i> —Give the eligibility criteria, and the sources and methods of selection of participants. Describe methods of follow-up<br><i>Case-control study</i> —Give the eligibility criteria, and the sources and methods of case ascertainment and control selection. Give the rationale for the choice of cases and controls<br><i>Cross-sectional study</i> —Give the eligibility criteria, and the sources and methods of selection of participants | <i>Cohort study</i> -<br>NA<br><br><i>Case-control</i> -<br>NA<br><br><i>Cross-sectional</i> -<br>YES | <i>Cross-sectional study – Eligibility criteria</i> : Inclusion exclusion criteria. Pages 9-10. <i>Sources of selection</i> : Page 8-9. |
|                           |         | (b) <i>Cohort study</i> —For matched studies, give matching criteria and number of exposed and unexposed<br><i>Case-control study</i> —For matched studies, give matching                                                                                                                                                                                                                                                                                              | <i>Cohort study</i><br>NA<br><br><i>Case-control</i> -<br>NA                                          |                                                                                                                                         |

|                              |    |                                                                                                                                                                                                                                                                                                           |                                                                                                   |                                                                                                                              |
|------------------------------|----|-----------------------------------------------------------------------------------------------------------------------------------------------------------------------------------------------------------------------------------------------------------------------------------------------------------|---------------------------------------------------------------------------------------------------|------------------------------------------------------------------------------------------------------------------------------|
|                              |    | criteria and the number of controls per case                                                                                                                                                                                                                                                              |                                                                                                   |                                                                                                                              |
| Variables                    | 7  | Clearly define all outcomes, exposures, predictors, potential confounders, and effect modifiers. Give diagnostic criteria, if applicable                                                                                                                                                                  | Yes                                                                                               | <i>Outcomes-</i> Study characteristics. Page 10<br>Primary outcomes of Results Reporting and Spin. Page 11-13.               |
| Data sources/<br>measurement | 8* | For each variable of interest, give sources of data and details of methods of assessment (measurement). Describe comparability of assessment methods if there is more than one group                                                                                                                      | Yes                                                                                               | <i>Data Sources-</i> Data Sources and Search Strategy. Page 8<br><br><i>Methods of assessment-</i> Data extraction: Page 10. |
| Bias                         | 9  | Describe any efforts to address potential sources of bias                                                                                                                                                                                                                                                 | Yes                                                                                               | Data extraction. Duplicate coding, Data extraction instrument. Page 10.                                                      |
| Study size                   | 10 | Explain how the study size was arrived at                                                                                                                                                                                                                                                                 | NA                                                                                                | A universal sample - All studies that met our inclusion and exclusion criteria were included.                                |
| Quantitative variables       | 11 | Explain how quantitative variables were handled in the analyses. If applicable, describe which groupings were chosen and why                                                                                                                                                                              | Yes                                                                                               | Analysis. Page 13.                                                                                                           |
| Statistical methods          | 12 | (a) Describe all statistical methods, including those used to control for confounding                                                                                                                                                                                                                     | Yes                                                                                               | Analysis: Page 13                                                                                                            |
|                              |    | (b) Describe any methods used to examine subgroups and interactions                                                                                                                                                                                                                                       | Yes                                                                                               | Sensitivity analysis: Page 13. No subgroup analysis.                                                                         |
|                              |    | (c) Explain how missing data were addressed                                                                                                                                                                                                                                                               | NA                                                                                                | No missing data as preprints and final publications were obtained for each included study.                                   |
|                              |    | (d) <i>Cohort study</i> —If applicable, explain how loss to follow-up was addressed<br><i>Case-control study</i> —If applicable, explain how matching of cases and controls was addressed<br><i>Cross-sectional study</i> —If applicable, describe analytical methods taking account of sampling strategy | <i>Cohort study-</i><br>NA<br><br><i>Case-control-</i><br>NA<br><br><i>Cross-sectional-</i><br>NA |                                                                                                                              |
|                              |    | (e) Describe any sensitivity analyses                                                                                                                                                                                                                                                                     | Yes                                                                                               | Sensitivity Analysis. Page 13.                                                                                               |

Continued on next page

| Results          |     | Included                                                                                                                                                                                                     | Reference |                                                                                                                                               |
|------------------|-----|--------------------------------------------------------------------------------------------------------------------------------------------------------------------------------------------------------------|-----------|-----------------------------------------------------------------------------------------------------------------------------------------------|
| Participants     | 13* | (a) Report numbers of individuals at each stage of study—eg numbers potentially eligible, examined for eligibility, confirmed eligible, included in the study, completing follow-up, and analysed            | Yes       | PRISMA Diagram, Figure 1 and page 8 under Search Strategy.                                                                                    |
|                  |     | (b) Give reasons for non-participation at each stage                                                                                                                                                         | NA        | All studies that met inclusion and exclusion criteria were included                                                                           |
|                  |     | (c) Consider use of a flow diagram                                                                                                                                                                           | Yes       | PRISMA Diagram, Figure 1                                                                                                                      |
| Descriptive data | 14* | (a) Give characteristics of study participants (eg demographic, clinical, social) and information on exposures and potential confounders                                                                     | Yes       | Study characteristics. Page 13-14.                                                                                                            |
|                  |     | (b) Indicate number of participants with missing data for each variable of interest                                                                                                                          | NA        | No missing data as preprints and final publications were obtained for each included study.                                                    |
|                  |     | (c) <i>Cohort study</i> —Summarise follow-up time (eg, average and total amount)                                                                                                                             | NA        |                                                                                                                                               |
| Outcome data     | 15* | <i>Cohort study</i> —Report numbers of outcome events or summary measures over time                                                                                                                          | Yes       | Tables 1-5, Discrepancies in study characteristics – page 14, Discrepancies in results reporting, page 14-15. Discrepancies in spin, page 15. |
|                  |     | <i>Case-control study</i> —Report numbers in each exposure category, or summary measures of exposure                                                                                                         | NA        |                                                                                                                                               |
|                  |     | <i>Cross-sectional study</i> —Report numbers of outcome events or summary measures                                                                                                                           | NA        |                                                                                                                                               |
| Main results     | 16  | (a) Give unadjusted estimates and, if applicable, confounder-adjusted estimates and their precision (eg, 95% confidence interval). Make clear which confounders were adjusted for and why they were included | Yes       | <i>Unadjusted estimates</i> - Tables 1-4                                                                                                      |
|                  |     | (b) Report category boundaries when continuous variables were categorized                                                                                                                                    | NA        |                                                                                                                                               |
|                  |     | (c) If relevant, consider translating estimates of relative risk into absolute risk for a meaningful time period                                                                                             | NA        |                                                                                                                                               |

|                          |    |                                                                                                                                                                            |     |                                                                               |
|--------------------------|----|----------------------------------------------------------------------------------------------------------------------------------------------------------------------------|-----|-------------------------------------------------------------------------------|
| Other analyses           | 17 | Report other analyses done—eg analyses of subgroups and interactions, and sensitivity analyses                                                                             | Yes | Sensitivity analysis, page 16 and Supplemental file. Tables S1 – S4.          |
| <b>Discussion</b>        |    |                                                                                                                                                                            |     |                                                                               |
| Key results              | 18 | Summarise key results with reference to study objectives                                                                                                                   | Yes | Principal Findings: Page 16-17                                                |
| Limitations              | 19 | Discuss limitations of the study, taking into account sources of potential bias or imprecision. Discuss both direction and magnitude of any potential bias                 | Yes | Strengths and weaknesses: Pages 20-21                                         |
| Interpretation           | 20 | Give a cautious overall interpretation of results considering objectives, limitations, multiplicity of analyses, results from similar studies, and other relevant evidence | Yes | Discussion re peer review - Pages 18. Overall conclusion – page 21            |
| Generalisability         | 21 | Discuss the generalisability (external validity) of the study results                                                                                                      | Yes | Comparison to other studies – page 19-20. Strengths and weaknesses – page 20. |
| <b>Other information</b> |    |                                                                                                                                                                            |     |                                                                               |
| Funding                  | 22 | Give the source of funding and the role of the funders for the present study and, if applicable, for the original study on which the present article is based              | Yes | page 21                                                                       |

\*Give information separately for cases and controls in case-control studies and, if applicable, for exposed and unexposed groups in cohort and cross-sectional studies.

**Note:** An Explanation and Elaboration article discusses each checklist item and gives methodological background and published examples of transparent reporting. The STROBE checklist is best used in conjunction with this article (freely available on the Web sites of PLoS Medicine at <http://www.plosmedicine.org/>, Annals of Internal Medicine at <http://www.annals.org/>, and Epidemiology at <http://www.epidem.com/>). Information on the STROBE Initiative is available at [www.strobe-statement.org](http://www.strobe-statement.org).

# BMJ Open

## Cross-sectional study of preprints and final journal publications from COVID-19 studies: Discrepancies in results reporting and spin in interpretation

|                                 |                                                                                                                                                                                                                                                                                                                                                                                                                                                                                                                                                                                                                                                                                                                                                                                                                                                                                                                                             |
|---------------------------------|---------------------------------------------------------------------------------------------------------------------------------------------------------------------------------------------------------------------------------------------------------------------------------------------------------------------------------------------------------------------------------------------------------------------------------------------------------------------------------------------------------------------------------------------------------------------------------------------------------------------------------------------------------------------------------------------------------------------------------------------------------------------------------------------------------------------------------------------------------------------------------------------------------------------------------------------|
| Journal:                        | <i>BMJ Open</i>                                                                                                                                                                                                                                                                                                                                                                                                                                                                                                                                                                                                                                                                                                                                                                                                                                                                                                                             |
| Manuscript ID                   | bmjopen-2021-051821.R2                                                                                                                                                                                                                                                                                                                                                                                                                                                                                                                                                                                                                                                                                                                                                                                                                                                                                                                      |
| Article Type:                   | Original research                                                                                                                                                                                                                                                                                                                                                                                                                                                                                                                                                                                                                                                                                                                                                                                                                                                                                                                           |
| Date Submitted by the Author:   | 22-Jun-2021                                                                                                                                                                                                                                                                                                                                                                                                                                                                                                                                                                                                                                                                                                                                                                                                                                                                                                                                 |
| Complete List of Authors:       | Bero, Lisa; University of Colorado - Anschutz Medical Campus, General Internal Medicine / Public Health / Center for Bioethics and Humanities<br>Lawrence, Rosa; University of Colorado - Anschutz Medical Campus, General Internal Medicine / Public Health / Center for Bioethics and Humanities<br>Leslie, Louis; University of Colorado - Anschutz Medical Campus, General Internal Medicine / Public Health / Center for Bioethics and Humanities<br>Chiu, Kellia; The University of Sydney,<br>McDonald, Sally; The University of Sydney<br>Page, Matthew; Monash University, School of Public Health and Preventive Medicine; Monash University<br>Grundy, Quinn; University of Sydney, Faculty of Nursing<br>Parker, Lisa; The University of Sydney, Centre for Values, Ethics and the Law in Medicine<br>Boughton, Stephanie; Cochrane<br>Kirkham, Jamie J.; Manchester University, Biostatistics<br>Featherstone, Robin; Cochrane |
| <b>Primary Subject Heading</b>: | Medical publishing and peer review                                                                                                                                                                                                                                                                                                                                                                                                                                                                                                                                                                                                                                                                                                                                                                                                                                                                                                          |
| Secondary Subject Heading:      | Public health, Research methods                                                                                                                                                                                                                                                                                                                                                                                                                                                                                                                                                                                                                                                                                                                                                                                                                                                                                                             |
| Keywords:                       | ETHICS (see Medical Ethics), PUBLIC HEALTH, QUALITATIVE RESEARCH                                                                                                                                                                                                                                                                                                                                                                                                                                                                                                                                                                                                                                                                                                                                                                                                                                                                            |
|                                 |                                                                                                                                                                                                                                                                                                                                                                                                                                                                                                                                                                                                                                                                                                                                                                                                                                                                                                                                             |

SCHOLARONE™  
Manuscripts



I, the Submitting Author has the right to grant and does grant on behalf of all authors of the Work (as defined in the below author licence), an exclusive licence and/or a non-exclusive licence for contributions from authors who are: i) UK Crown employees; ii) where BMJ has agreed a CC-BY licence shall apply, and/or iii) in accordance with the terms applicable for US Federal Government officers or employees acting as part of their official duties; on a worldwide, perpetual, irrevocable, royalty-free basis to BMJ Publishing Group Ltd ("BMJ") its licensees and where the relevant Journal is co-owned by BMJ to the co-owners of the Journal, to publish the Work in this journal and any other BMJ products and to exploit all rights, as set out in our [licence](#).

The Submitting Author accepts and understands that any supply made under these terms is made by BMJ to the Submitting Author unless you are acting as an employee on behalf of your employer or a postgraduate student of an affiliated institution which is paying any applicable article publishing charge ("APC") for Open Access articles. Where the Submitting Author wishes to make the Work available on an Open Access basis (and intends to pay the relevant APC), the terms of reuse of such Open Access shall be governed by a Creative Commons licence – details of these licences and which [Creative Commons](#) licence will apply to this Work are set out in our licence referred to above.

Other than as permitted in any relevant BMJ Author's Self Archiving Policies, I confirm this Work has not been accepted for publication elsewhere, is not being considered for publication elsewhere and does not duplicate material already published. I confirm all authors consent to publication of this Work and authorise the granting of this licence.



1  
2  
3 **Cross-sectional study of preprints and final journal publications from COVID-19 studies:**  
4 **Discrepancies in results reporting and spin in interpretation**  
5

6 Lisa Bero, PhD (corresponding author)  
7

8 Professor of Medicine and Public Health  
9  
10 Chief Scientist, Center for Bioethics and Humanities  
11  
12 University of Colorado Anschutz Medical Campus  
13  
14 13080 E. 19<sup>th</sup> Ave, Aurora, CO 80045 | Mail Stop B137  
15

16 [lisa.bero@CUAnschutz.edu](mailto:lisa.bero@CUAnschutz.edu)  
17

18 ORCID ID: 0000 0003 1893 6651  
19

20 Rosa Lawrence, BA  
21

22 Professional Research Assistant  
23  
24 Center for Bioethics and Humanities  
25  
26 University of Colorado Anschutz Medical Campus  
27  
28

29 [rosa.lawrence@cuanschutz.edu](mailto:rosa.lawrence@cuanschutz.edu)  
30

31 ORCID ID: 0000 0001 7954 5860  
32

33 Louis Leslie, BA  
34

35 Research Assistant  
36  
37 Center for Bioethics and Humanities  
38  
39 University of Colorado Anschutz Medical Campus  
40  
41

42 [louis.lesile@cuanschutz.edu](mailto:louis.lesile@cuanschutz.edu)  
43

44 ORCID ID: 0000 0002 4013 4914  
45

46 Kellia Chiu, BPharm (Hons)  
47

48 PhD Candidate  
49  
50 Charles Perkins Centre & School of Pharmacy, Faculty of Medicine and Health  
51  
52 The University of Sydney, Sydney, Australia  
53  
54

55 [kellia.chiu@sydney.edu.au](mailto:kellia.chiu@sydney.edu.au)  
56  
57

1  
2  
3 ORCID: 0000-0002-4358-6641  
4

5 Sally McDonald, MNutrDiet  
6

7 PhD Candidate  
8

9 Charles Perkins Centre & School of Pharmacy, Faculty of Medicine and Health  
10

11 The University of Sydney, Sydney, Australia  
12

13 [sally.mcdonald@sydney.edu.au](mailto:sally.mcdonald@sydney.edu.au)  
14

15 ORCID:0000-0002-1406-3016  
16

17 Matthew J Page, PhD  
18

19 Senior Research Fellow  
20

21 School of Public Health and Preventive Medicine  
22

23 Monash University, Melbourne, Australia  
24

25 [matthew.page@monash.edu](mailto:matthew.page@monash.edu)  
26

27 ORCID: 0000-0002-4242-7526  
28

29 Quinn Grundy, RN, PhD  
30

31 Assistant Professor  
32

33 Lawrence S. Bloomberg Faculty of Nursing, University of Toronto  
34

35 [quinn.grundy@utoronto.ca](mailto:quinn.grundy@utoronto.ca)  
36

37 ORCID: 0000-0002-7640-8614  
38

39 Lisa Parker, MBBS (Hons), PhD  
40

41 Honorary Lecturer  
42

43 Charles Perkins Centre and School of Pharmacy, Faculty of Medicine and Health  
44

45 The University of Sydney, Sydney, Australia  
46

47 [lisa.parker@sydney.edu.au](mailto:lisa.parker@sydney.edu.au)  
48

49 ORCID: 0000-0001-8635-6953  
50

51 Stephanie L Boughton, MBBS  
52

53 Research Integrity Editor  
54

55 Editorial and Methods Department, Cochrane, UK  
56  
57

1  
2  
3 E: [sboughton@cochrane.org](mailto:sboughton@cochrane.org)  
4

5 ORCID: 0000-0001-5374-7464  
6  
7

8 Jamie J Kirkham, BSc, MSc, PhD  
9

10 Professor of Biostatistics  
11

12 Centre for Biostatistics, Manchester Academic Health Science Centre  
13

14 University of Manchester, Manchester, United Kingdom  
15

16 [jamie.kirkham@manchester.ac.uk](mailto:jamie.kirkham@manchester.ac.uk)  
17

18 ORCID: 0000-0003-2579-9325  
19  
20

21 Robin Featherstone, MLIS  
22

23 Information Specialist  
24

25 Cochrane Editorial and Methods Department UK  
26

27 [rfeatherstone@cochrane.org](mailto:rfeatherstone@cochrane.org)  
28

29 ORCID: 0000-0003-2517-2258  
30  
31  
32  
33  
34  
35  
36  
37  
38  
39  
40  
41  
42  
43  
44  
45  
46  
47  
48  
49  
50  
51  
52  
53  
54  
55  
56  
57  
58  
59  
60

## ABSTRACT

Objective: To compare results reporting and the presence of spin in COVID-19 study preprints with their finalized journal publications

Design: Cross-sectional

Setting: International medical literature

Participants: Preprints and final journal publications of 67 interventional and observational studies of COVID-19 treatment or prevention from the Cochrane COVID-19 Study Register published between March 1, 2020 and October 30, 2020

Main outcome measures: Study characteristics and discrepancies in 1) Results reporting (number of outcomes, outcome descriptor, measure, metric, assessment time point, data reported, reported statistical significance of result, type of statistical analysis, subgroup analyses (if any), whether outcome was identified as primary or secondary) and 2) Spin (reporting practices that distort the interpretation of results so they are viewed more favorably).

Results: Of 67 included studies, 23 (34%) had no discrepancies in results reporting between preprints and journal publications. Fifteen (22%) studies had at least one outcome that was included in the journal publication, but not the preprint; 8 (12%) had at least one outcome that was reported in the preprint only. For outcomes that were reported in both preprints and journals, common discrepancies were differences in numerical values and statistical significance, additional statistical tests and subgroup analyses and longer follow-up times for outcome assessment in journal publications.

At least one instance of spin occurred in both preprints and journals in 23 / 67 (34%) studies, the preprint only in 5 (7%), and the journal publications only in 2 (3%). Spin was removed between the preprint and journal publication in 5/67 (7%) studies; but added in 1/67 (1%) study.

Conclusions: The COVID-19 preprints and their subsequent journal publications were largely similar in reporting of study characteristics, outcomes and spin. All COVID-19 studies published as preprints and journal publications should be critically evaluated for discrepancies and spin.

## Article summary

### Strengths and limitations of this study

- We examine two critical threats to research integrity –components of outcome reporting and the presence of spin – in COVID-19 studies on treatment or prevention published as preprints and journal publications.
- We selected studies from the Cochrane COVID-19 Register rather than conducting a literature search to optimize the identification COVID-19 clinical research that is useful for systematic reviews.
- We may have identified a different number of discrepancies if we compared later versions of the preprint, rather than the first version, with the journal publication.
- Although clinically important, our focus on COVID-19 research may not be representative of other types of research published as preprints, then journal publications.
- We limited our sample to preprints which authors submitted to journals and that were published.

### EQUATOR REPORTING GUIDELINE: STROBE

## **INTRODUCTION**

Preprints have been advocated as a means for rapid sharing and updating of research findings, which could be particularly valuable during a pandemic.[1] Preprints are non-peer-reviewed postings of research articles. Preprints have been a common form of publication in the natural sciences for decades, and more recently in the life sciences. In 2019, BMJ, Yale and Cold Spring Harbor Laboratory launched medRxiv, a preprint server dedicated to clinical and health sciences research.

In April 2020, medRxiv published between 50 and 100 COVID-19-related preprints daily.[1] The accelerated pace of research related to COVID-19 has increased the potential impact and risk of using preprints. Widespread public dissemination of preprints may spread misinformation.[2] A study comparing 34 preprints and 62 publications about therapies for COVID-19 found that publications had significantly more citations than the preprints (median of 22 vs 5.5 citations;  $P = .01$ ), but there were no significant differences for attention and online engagement metrics.[3]

Most preprint servers conduct some type of screening prior to posting, commonly related to the scope of the article, plagiarism, and compliance with legal and ethical requirements[4], but preprints have not been peer-reviewed and may not meet the methodological and reporting requirements of a journal. A review of the medRxiv preprint server one year after its launch found that 9967 of 11164 (89%) of submissions passed screening.[5] It is not clear whether or how preprint servers might screen for quality of results reporting or spin.[6,7] Spin refers to specific reporting practices that distort the interpretation of results so that results are viewed more favorably.

Preliminary studies suggest that reporting discrepancies may exist between preprints and subsequent publications. However, there has been no systematic assessment of results reporting or spin between preprints and their final journal publications. Carneiro et al. counted reported items from a checklist meant to cover common points from multiple reporting

1  
2  
3 guidelines and found reporting quality to be marginally higher in journal articles, both in a set  
4 of bioRxiv preprints matched to their journal publication (n=56 article/group) and in an  
5 unmatched set (n=76 articles/group).[8] An analysis of preprints from arXiv, a primarily physics/  
6 mathematics preprint server, and their journal publications using text comparison algorithms  
7 found little difference between preprints and published articles.[9] However, an analysis of  
8 medRxiv and bioRxiv preprints related to COVID-19 pharmacological interventions found that  
9 only 24% (23/97) of preprints were published in a journal within 0 to 98 days (median: 42.0  
10 days). Among these, almost half (11/23, 48%) had modifications in the title or results section,  
11 although the nature of these modifications is not described.[10] An analysis of spin in preprints  
12 and journal publications for COVID-19 trials found a single difference between 2 matched pairs  
13 of preprints and their journal publications: the discussion of limitations in the abstract.  
14 Limitations were discussed in the abstract of one article, but not in its accompanying preprint.  
15 [11] An analysis of 66 preprint-article pairs of COVID-19 studies found 38% had changes in study  
16 results, such as a numeric change in hazard ratio or a change in p value, and 29% had changes  
17 in abstract conclusions, most commonly from “positive without reporting uncertainty” in the  
18 preprint to “positive with reporting of uncertainty” in the article.[12]

19  
20  
21  
22  
23  
24  
25  
26  
27  
28  
29  
30  
31  
32  
33  
34  
35  
36  
37  
38  
39  
40  
41  
42  
43  
44  
45  
46  
47  
48  
49  
50  
51  
52  
53  
54  
55  
56  
57  
58  
59  
60  
The trustworthiness and validity of scientific publications, even after peer review, are  
weakened by a variety of problems.[13,14] Selective and incomplete results reporting[15,16]  
and spin[17,18] are two critical threats, especially for clinical studies of treatment or  
prevention. These reporting practices could be particularly dangerous for users of COVID-19  
research as they can inflate the efficacy of interventions and underestimate harms. Given the  
high prevalence, visibility, and potentially rapid implementation of COVID-19 research  
published as preprints, this study is the first to compare components of outcome reporting and  
the presence of spin in COVID-19 studies on treatment or prevention that are published both as  
preprints and journal publications.

## **METHODS**

The protocol for this study was registered in the Open Science Framework.[19]

1  
2  
3  
4  
5 **Data Source and Search Strategy:** We sampled studies from the Cochrane COVID-19 Study  
6 Register (<https://covid-19.cochrane.org/>), a freely-available, continually-updated, annotated  
7 reference collection of human primary studies on COVID-19, including interventional,  
8 observational, diagnostic, prognostic, epidemiological and qualitative designs. The register is  
9 "study-based," meaning references to the same study (e.g., press releases, trial registry records,  
10 preprints, journal pre-proofs, journal final publications, retraction notices) are all linked to a  
11 single study identifier. References are screened for eligibility to determine if they are primary  
12 studies (e.g., not opinion pieces or narrative reviews). Data sources for the Cochrane COVID-19  
13 Study Register at the time of the search included ClinicalTrials.gov, the International Clinical  
14 Trials Registry Platform (ICTRP), PubMed, medRxiv and Embase.com. The Cochrane register  
15 prioritizes medRxiv as a preprint source as an internal sensitivity analysis in May 2020 showed  
16 that 90% (166/185) of the preprints that were eligible for systematic reviews came from this  
17 source. The register also includes preprint records sourced from PubMed.  
18  
19  
20  
21  
22  
23  
24  
25  
26  
27  
28  
29

30 All studies in the register are classified by study design (interventional, observational,  
31 modelling, qualitative, other or unclear) and research aim (prevention, treatment and  
32 management, diagnostic/prognostic, epidemiology, health services research, mechanism,  
33 transmission, other). Studies may be classified as having multiple research aims.  
34  
35  
36  
37

38 Four searches using the register's search filters for study reference types (preprints and journal  
39 articles) and study characteristics (study type and study aim) were used to retrieve references  
40 with a study aim of a) treatment and management or b) prevention and classified as  
41 interventional or observational (see OSF project for the complete search strategies:  
42 <https://osf.io/8qfby/>). As the register is updated daily, we repeated the search. The Cochrane  
43 COVID-19 Study Register was first searched by RF on October 13, and updated on October 29,  
44 2020. Results were exported to Excel and duplicates manually identified. The searches  
45 identified 297 references for 117 studies, with 67 (21 interventional, 46 observational) that met  
46 our inclusion and exclusion criteria for study selection (Figure 1).  
47  
48  
49  
50  
51  
52  
53  
54  
55  
56  
57



1  
2  
3 **Inclusion and exclusion criteria for study selection:** We included studies of COVID-19  
4 treatment or prevention identified in the search that had both a posted preprint and final  
5 journal publication.  
6  
7

8  
9  
10 We included studies with aims of diagnosis/prognosis, epidemiology, health services research,  
11 mechanism, transmission and other if they also had an aim coded as a) treatment and  
12 management or b) prevention. We excluded modelling studies, qualitative studies and studies  
13 that reported only descriptive data (e.g., demographic characteristics).  
14

15  
16 We screened all records for each included study to identify posted preprints and journal  
17 publications from each study. We excluded duplicates and records for protocols, trial registries,  
18 commentaries, letters to the editor, news articles, and press releases. We excluded records  
19 that did not report results and non-English records.  
20  
21  
22  
23  
24  
25

26  
27 We compared the preprint and journal publication for each included study. In the case of  
28 multiple preprints or journal publications reporting study results, we selected the first preprint  
29 version and the final journal publication that reported on similar study populations. This was to  
30 ensure that the preprint version evaluated in our study had not been altered in response to any  
31 comments, which could constitute a form of peer review, and that it was representative of the  
32 version most likely to be seen by clinicians, journalists and other research users as new research  
33 became available.  
34  
35  
36  
37  
38  
39  
40

41 **Data extraction:** Ten investigators (LB, SLB, KC, QG, JJK, LL, RL, SMc, LP, MJP) working  
42 independently in pairs extracted data from the included studies. Discrepancies in data  
43 extraction were resolved by consensus. If agreement could not be reached, an investigator  
44 who was not part of the coding pair resolved the discrepancies. All extracted data from the  
45 included studies was stored in REDCap, a secure web-based application for the collection and  
46 management of data.[20] We extracted data from the both the medRxiv page and PDF for  
47 preprints and the online publication or PDF for journal articles, referring to the PDF if  
48  
49  
50  
51  
52  
53  
54  
55  
56  
57

1  
2  
3 information differed. We extracted data on results reporting, presence of spin and study  
4 characteristics as described below.  
5  
6  
7

8  
9 **Study characteristics:** For each preprint, we recorded the earliest posting date; for each journal  
10 publication we extracted the submitted/received, reviewed, revised, accepted and published  
11 date(s), where available.  
12  
13  
14  
15

16 From each journal publication, we extracted: authors, title, funding source, author conflicts of  
17 interests, ethics approval, country of study, and sample size. For the accompanying preprint, we  
18 determined if these study characteristics were also reported. If they were, and the content of  
19 the item differed between the preprint and publication, details of the discrepancy were  
20 recorded. In addition, we recorded discrepancies between the preprint and journal publication  
21 in demographic characteristics of study participants (e.g., sex, race/ethnicity, diagnosis),  
22 discussion of limitations (regardless of whether there was a labeled limitations section or not),  
23 and tables and figures.  
24  
25  
26  
27  
28  
29  
30  
31

32 **Primary outcomes:** Our primary outcome measures were 1) discrepancies in results reporting  
33 between preprints and journal publications and 2) presence and type of spin in preprints and  
34 journal publications.  
35  
36  
37  
38  
39

#### 40 Results reporting:

41 We collected data on discrepancies in 1) number of outcomes reported in preprints and journal  
42 publications and, for outcomes reported in both preprints and journal publications, 2)  
43 components of results reporting. For each journal publication and preprint, we recorded the  
44 number of outcomes reported, whether outcomes were reported only in the preprint or journal  
45 publication, and the outcome descriptor (e.g., mortality, hospitalization, transmission,  
46 immunogenicity, harms).  
47  
48  
49  
50  
51  
52  
53  
54  
55  
56  
57  
58  
59  
60

1  
2  
3 For outcomes that were reported in both preprints and journal publications, we collected data  
4 on components of outcome reporting based on recommendations for clinical study results  
5 reporting.[16,21] We recorded whether there were discrepancies between any components of  
6 outcome reporting between journal publications and preprints. We extracted the text relevant  
7 to each discrepancy:  
8  
9  
10  
11

- 12 ● Measure (e.g., PCR test)
- 13 ● Metric (e.g., mean change from baseline, proportion of people)
- 14 ● Time point at which the assessment was made (e.g., 1 week after starting treatment).
- 15 ● Numerical values reported (e.g., effect estimate and measure of precision)
- 16 ● Statistical significance of result (as reported)
- 17 ● Type of statistical analysis (e.g., regression, chi-squared test)
- 18 ● Subgroup analyses (if any)
- 19 ● Whether outcome was identified as primary or secondary

### 20 Spin:

21 Studies have used a variety of methods to measure spin in randomized controlled trials and  
22 observational studies.[17] Based on our previously developed typology of spin derived from a  
23 systematic review of spin studies,[17] we developed and pretested a coding tool for spin that  
24 can be applied to both interventional and observational studies of treatment or prevention. In  
25 the context of research on treatment or prevention of COVID-19, the most meaningful  
26 consequences of spin are overinterpretation of efficacy and underestimation of harms.  
27 Therefore, our tool emphasizes these manifestations of spin. We searched the abstracts and  
28 full text of each preprint and journal publication for 3 primary categories of spin, and  
29 accompanying subcategories:  
30

#### 31 1) Inappropriate interpretation given study design

- 32 ● Claiming causality in non-randomized studies
- 33 ● Interpreting a lack of statistical significance as equivalence

- 1
- 2
- 3 ● Interpreting a lack of statistical significance of harm measures as safety
- 4 ● Claim of any significant difference despite lack of statistical test
- 5 ● Other
- 6
- 7
- 8
- 9 2) Inappropriate extrapolations or recommendations
- 10 ● Suggestion that the intervention or exposure is more clinically relevant or useful than is
- 11 justified given the study design
- 12 ● Recommendation made to population groups / contexts outside of those investigated
- 13 ● (Observational) Expressing confidence in an intervention or exposure without
- 14 suggesting the need for further confirmatory studies
- 15 ● Other
- 16
- 17
- 18
- 19
- 20
- 21 3) Selectively focusing on positive results or more favorable data presentation
- 22 ● Discussing only significant (non-primary) results to distract from non-significant primary
- 23 results
- 24 ● Omitting non-significant results from abstract / discussion / conclusion
- 25 ● Claiming significant effects for non-significant results
- 26 ● Acknowledging statistically nonsignificant results from the primary outcome but
- 27 emphasizing the beneficial effect of treatment
- 28 ● Describing non-significant results as “trending towards significance”
- 29 ● Mentioning adverse effects in the abstract / discussion /conclusion but minimizing their
- 30 potential effect or importance
- 31 ● Misleading description of study design as one that is more robust
- 32 ● Use of linguistic spin
- 33 ● Other
- 34
- 35
- 36
- 37
- 38
- 39
- 40
- 41
- 42
- 43
- 44
- 45
- 46

47 **Analysis:** We report the frequency and types of discrepancies in study characteristics and  
48 results reporting between preprints and journal publications. We report the proportion of  
49 preprints and journal publications with spin and the types of spin. We iteratively analyzed the  
50 text descriptions of discrepancies identified; we grouped descriptions into common categories,  
51  
52  
53  
54  
55  
56  
57

1  
2  
3 while still accounting for all instances of discrepant reporting, even if they only occurred once,  
4 to demonstrate the range of the phenomenon.  
5  
6  
7

8  
9 To determine whether preprints that were posted after an article had likely received peer  
10 review influenced the number of discrepancies, we conducted a *post hoc* sensitivity analysis by  
11 removing 7 studies where the preprint was posted up to 7 days before the revision, acceptance,  
12 or publication dates of the journal publication.  
13  
14  
15

16  
17  
18 Our protocol modification, list of included preprints and journal publications, data dictionary  
19 and dataset are available in our OSF project linked to our protocol: <https://osf.io/5ru8w/>.  
20  
21  
22

23 **Ethics approval:** This study analyzes publicly available information and is exempt from ethics  
24 review.  
25  
26  
27

### 28 **Patient and Public Involvement**

29 No patient involvement.  
30  
31  
32  
33  
34  
35  
36  
37  
38  
39  
40  
41  
42  
43  
44  
45  
46  
47  
48  
49  
50  
51  
52  
53  
54  
55  
56  
57  
58  
59  
60

## **RESULTS**

**Study characteristics:** Of the 67 included studies, 57 were studies of treatment and management, 9 of prevention, and 1 of both. The preprints and journal publications were published between March 1, 2020 and October 30, 2020 with a mean time between preprint and journal publication of 65.4 days (range 0 to 271 days). The topics of the studies varied and included effects of clinical and public health interventions, associations of risk factors with COVID-19 symptoms, and ways to improve implementation of public health measures, such as social distancing. Almost a third of studies (21/67, 31%) were conducted in the United States, followed by Italy and Spain (n = 6, 9% each), and China (n = 5, 7%). The majority of studies reported public or non-profit funding sources (n=32, 49%) or that no funding was provided (n=24, 36%). Over half the studies also reported that the authors had no conflicts of interest (n=37, 53%).

**Discrepancies in study characteristics:** Table 1 shows discrepancies in study characteristics reported in preprints and journal publications. The Table shows whether each study characteristic was reported or not; if a study characteristic was reported in both the preprint and journal publications, discrepancies in content are described. More preprints than journal publications reported funding source, author conflicts of interest and ethics approval; more journal publications than preprints reported participant demographics and study limitations. In all categories, most discrepancies occurred in the content of items that were reported, rather than in whether the item was present or not. For example, journal publications contained additional information on funding sources, conflicts of interest, demographic characteristics, and limitations, as well as more tables and figures compared to preprints (Table 1).

**Results reporting:** Of the 67 studies, 23 (34%) had no discrepancies in the number of outcomes reported between preprints and journal publications (Table 2). Twenty-three studies had outcomes that were missing from either the preprint or the journal publication. Fifteen (22%) studies had at least one outcome that was included in the journal publication, but not the

1  
2  
3 preprint; 8 (12%) had at least one outcome that was reported in the preprint only. The  
4 included studies had multiple outcomes. The majority of studies with missing reported  
5 outcomes (16/23, 70%) had one outcome missing from either the preprint or journal  
6 publication. However, two studies had 5 outcomes missing from the journal publication, but  
7 reported in the preprint only.[22–25] As described in Table 2, these omissions included  
8 important clinical or harm outcomes. For example, one preprint omitted toxicity outcomes that  
9 were reported in the journal publication.[26,27]  
10  
11  
12  
13  
14  
15  
16  
17

18 Table 3 shows the types of discrepancies in components of results reporting. We report the  
19 number of studies that had at least one discrepancy and, because studies have multiple  
20 outcomes, the number of discrepancies across all outcomes in the 67 studies. The most  
21 frequent types of discrepancies between outcomes reported in both preprints and journal  
22 publications were in the numerical values reported, statistical tests performed, subgroup  
23 analyses conducted, statistical significance reported, and timepoint at which the outcome was  
24 assessed (Table 3). The types of discrepancies were variable, although journal publications  
25 more commonly included additional statistical analyses and subgroup analyses compared to  
26 preprints. Journal publications more frequently reported outcomes measured over a longer  
27 time period than preprints.  
28  
29  
30  
31  
32  
33  
34  
35  
36  
37

38 **Spin:** At least one instance of spin occurred in the preprint, journal publication, or both in 30  
39 (45%) of the 67 studies. Spin occurred in both preprints and journal publications in 23 / 67  
40 (34%) studies, the preprint only in 5 (7%) studies, and the journal publications only in 2 (3%)  
41 studies (Table 4). Spin, in any category, was removed between the preprint and journal  
42 publication in 5 / 67(7%) studies; but added between the preprint and journal publication in 1  
43 (1%) study.  
44  
45  
46  
47  
48  
49  
50

51 Table 4 shows the categories of spin that occurred in preprints and their accompanying journal  
52 publications. Thirteen of 67 (19%) studies had changes in the type of spin present in the  
53 preprint versus the journal publication; 8 (12%) studies had at least one additional type of spin  
54  
55  
56  
57

1  
2  
3 present in the preprint, 2 (3%) studies had at least one additional type of spin present in the  
4 journal publication. Inappropriate extrapolation or recommendations was the most frequently  
5 occurring type of spin in both preprints and journal publications (11/67, 16% of studies). This  
6 type of spin and inappropriate interpretation given the study design occurred more frequently  
7 in preprints than journal publications.  
8  
9  
10  
11  
12

13  
14 An example of inappropriate interpretation was found in both the preprint and journal  
15 publication for an open-label non-randomised trial: the study investigated the effect of  
16 hydroxychloroquine (and in combination with azithromycin) on SARS-Co-V-2 viral load. They  
17 found a statistically significant viral load reduction at day 6; however, despite the small sample  
18 size and non-randomised study design, they concluded that their findings were “so significant”  
19 and recommended that “COVID-19 patients be treated with hydroxychloroquine and  
20 azithromycin to cure their infection and to limit the transmission of the virus to other people in  
21 order to curb the spread of COVID-19 in the world.”[28,29] An example of inappropriate  
22 extrapolation or recommendations that occurred in both the preprint and journal publication is  
23 a study that recommended specific policy approaches that were not tested in the study: “The  
24 UK will shortly enter a new phase of the pandemic, in which extensive testing, contact tracing  
25 and isolation will be required to keep the spread of COVID-19. For this to succeed, adherence  
26 must be improved.”[30,31] This observational study aimed to identify factors associated with  
27 individuals’ adherence to self-isolation and lockdown measures; the authors did not aim to  
28 investigate public adherence to testing recommendations or contact tracing, nor test their  
29 efficacy.  
30  
31  
32  
33  
34  
35  
36  
37  
38  
39  
40  
41  
42  
43  
44

45 **Sensitivity analysis:** The mean time between preprint posting and journal article publication  
46 was 65.4 days (range 0 – 271) (Supplemental file, Table S1). No preprints were posted after the  
47 revision, acceptance or publication dates for the accompanying journal publication. One  
48 preprint was posted the same date as the publication date. Discrepancies in study  
49 characteristics, outcome reporting and spin changed minimally when the analyses were  
50 conducted after removing 7 studies where the preprint was posted up to 7 days before the  
51  
52  
53  
54  
55  
56  
57  
58  
59  
60



1  
2  
3 revision, acceptance, or publication dates of the journal publication (Supplemental file, Tables  
4 S2 – S4).  
5  
6  
7

## 8 **DISCUSSION**

9  
10  
11  
12 *Principal findings.* Discrepancies between results reporting in preprints and their accompanying  
13 journal publications were frequent, but most often consisted of differences in content rather  
14 than a complete lack of reporting. Although infrequent, some outcomes that were not  
15 reported would have provided information that is critical for clinical decision making, such as  
16 clinical or harm outcomes that appeared only in the journal publication. The finding that  
17 outcomes reported in journal publications were measured over a longer time frame than  
18 outcomes reported in preprints indicates that the preprints were being used to publish  
19 preliminary or interim data. Preliminary or interim findings should be clearly labeled in  
20 preprints.  
21  
22  
23  
24  
25  
26  
27  
28  
29

30  
31 Although almost half of the preprints and journal publications contained spin, there was no  
32 clear difference in the types of spin. Spin is an enduring problem in the medical literature.[17]  
33 Our findings suggest that the identification and prevention of spin during journal peer review  
34 and editorial processes needs further improvement.  
35  
36  
37  
38  
39

40 More preprints reported funding source, author conflicts of interest and ethics approval than  
41 journal publications. These differences may be due to the screening requirements of medRxiv,  
42 the main source of preprints in our sample. When reported in both, journal publications  
43 included more detailed information on funding source, conflicts of interest of authors, and  
44 demographics of the population studied. Journal publications also included more tables and  
45 figures, and more extensive discussion of limitations. Some of these differences may be due to  
46 more comprehensive reporting requirements of journals. Other changes, such as more  
47 information on the study population or greater discussion of limitations, may be due to  
48 requests for additional information during peer review.  
49  
50  
51  
52  
53  
54  
55  
56  
57

1  
2  
3  
4  
5 Since preprints are posted without peer review and most journal publications in our sample  
6 were likely to be peer reviewed because they were identified from PubMed, our study  
7 indirectly investigates the impact of peer review on research articles. Articles may not have  
8 been peer-reviewed in similar ways. Authors may have made changes in their papers that were  
9 independent of peer review. We observed instances where peer review appeared to improve  
10 clarity (e.g. more detail on measurements)[32,33] or interpretation (e.g. requirement to  
11 present risk differences rather than just n (%) per treatment group).[34,35] Empirical evidence  
12 on the impact of peer review on manuscript quality is scarce. A study comparing submitted and  
13 published manuscripts found that the number of changes was relatively small and, similar to  
14 our study, primarily involved adding or clarifying information.[13] Some of the changes  
15 requested by peer reviewers were classified as having a negative impact on reporting, such as  
16 the addition of post-hoc subgroup analyses, statistical analyses that were not prespecified, or  
17 optimistic conclusions that did not reflect the trial results. In our sample, additions of subgroup  
18 and statistical analyses were common between preprints and journal publications, although we  
19 did not determine their appropriateness.  
20  
21  
22  
23  
24  
25  
26  
27  
28  
29  
30  
31  
32  
33  
34

35 A small proportion of medRxiv preprints, 14% at the end of the server's first year, were  
36 published as journal publications.[5] Therefore, our sample could be limited to studies that  
37 their authors deemed of high enough quality to be eligible for submission to a journal. Or, our  
38 sample could be limited to articles that had not been rejected by a journal. It is possible that  
39 peer review was eliminating publications that were fundamentally unsound, while more quickly  
40 processing studies that were sound and useful. Under pandemic conditions, articles may  
41 undergo fewer revisions. For example, peer reviewers may not suggest changes they think are  
42 less important, or editors may accept articles when they would have normally requested minor  
43 or major revisions. Thus, in this situation, peer review may mainly be playing the role of  
44 determining whether a study should be published in a journal or not.  
45  
46  
47  
48  
49  
50  
51  
52  
53  
54  
55  
56  
57  
58  
59  
60

1  
2  
3 There were minimal changes in the frequency and types of discrepancies between preprints  
4 and journal publications when we conducted a sensitivity analysis limiting our sample to studies  
5 where the preprints were published before the revision or acceptance date of the journal  
6 publication. This suggests that our findings are robust even when the sample is limited to  
7 preprints that likely had not gone through the peer review process. Given this finding and the  
8 observed similarities between preprints and their subsequent journal publications, our results  
9 suggest that peer review during the accelerated pace of COVID-19 research publication may not  
10 have provided much added value. The urgency related to dissemination of COVID-19 research  
11 could have led journals to fast-track publication by abbreviating editorial or peer review  
12 processes, resulting in fewer differences between preprints and journal publications.  
13  
14  
15  
16  
17  
18  
19  
20  
21  
22

23 *Comparison to other studies.* Our results are consistent with other studies finding small  
24 changes in reporting between preprints and journal publications. A number of these studies  
25 have been limited by failing to assess the addition or deletion of outcomes and by the use of  
26 composite “scores” that included items related to risk of bias and reporting. In contrast to our  
27 study, in a matched sample of preprints and journal publications, Carneiro et al. found journal  
28 publications more likely to have conflict of interest statement than preprints. In a textual  
29 analysis using 5 different algorithms, Klein et al. found very little difference in text between  
30 preprints and articles in a large matched sample.[9] We also noted preprints and journal  
31 publications that were almost identical, or had very minor differences such as corrections of  
32 typos. Other studies are limited by comparing unmatched samples of preprints and articles. In  
33 a comparison of 13 preprints and 16 articles on COVID-19 that were not reporting on the same  
34 studies, Kataoka et al. found no significant differences in risk of bias or spin in titles and  
35 conclusions.[11]  
36  
37  
38  
39  
40  
41  
42  
43  
44  
45  
46  
47  
48

49 We found similar changes in numerical results to Oikonomidi et al. who compared 66 preprint-  
50 article pairs for COVID-19 studies and found 25 (38%) of studies had changes.[12] Oikonomidi  
51 classified 16 of these changes as “important” based on 1) an increase or decrease by  $\geq 10\%$  of  
52 the initial value in any effect estimate and/or 2) a change in the p-value crossing the threshold  
53  
54  
55  
56  
57  
58  
59  
60

1  
2  
3 of 0.05, for any study outcome. We did not classify changes based on magnitude or threshold  
4 p-values because changes in numerical values may be related to other components of outcome  
5 reporting that we observed, such as changes to follow-up times or the use of different  
6 statistical tests. Furthermore, deviations from a p-value of 0.05 do not necessarily indicate  
7 changes in scientific or clinical significance. We examined changes in multiple components of  
8 outcome reporting that are considered essential, not just the numerical value of the  
9 outcome.[16,21] The diversity of studies included in our sample would make any  
10 categorizations of scientific or clinical significance difficult and subjective. For example, studies  
11 were observational and experimental and not all studies conducted statistical analysis. The  
12 topics of the studies included tests of clinical and public health interventions, associations of  
13 risk factors with COVID-19 symptoms, and ways to improve implementation of public health  
14 measures, such as social distancing.  
15  
16  
17  
18  
19  
20  
21  
22  
23  
24  
25  
26

27 *Strengths and limitations of this study.* We selected studies from the Cochrane COVID-19  
28 Register rather than conducting a literature search. However, as the Cochrane COVID-19  
29 Register has been optimized to identify COVID-19 clinical research for systematic reviews, we  
30 feel the search was comprehensive for identifying COVID-19 studies related to treatment or  
31 prevention that are most likely to have an impact on clinical practice or health policy. As a  
32 study-based register, all records related to a study are identified, enabling us to obtain all  
33 preprint and journal publication versions for a single study. Second, we compared the first  
34 version of the preprint with the final journal publication. We may have identified a different  
35 number of discrepancies if we compared later versions of the preprint with the journal  
36 publication. Third, although clinically important, our focus on COVID-19 research may not be  
37 representative of other types of research published as preprints, then journal publications. This  
38 study should be replicated in a sample of non-COVID related interventional and observational  
39 clinical studies. Future research could also include assessment of outcome reporting  
40 components and spin in preprints that have not been published in journals. Fourth, although  
41 we compared non-peer-reviewed preprints to their accompanying journal publications, we did  
42 not directly assess the effects of peer review. Finally, coders were not blinded to the source or  
43  
44  
45  
46  
47  
48  
49  
50  
51  
52  
53  
54  
55  
56  
57  
58  
59  
60

1  
2  
3 authors of preprints and journal publications as this was not feasible and there is no evidence  
4 that it would alter the decisions made.  
5  
6  
7

## 8 **CONCLUSIONS**

10 The COVID-19 preprints and their subsequent journal publications were largely similar in  
11 reporting of study characteristics, outcomes and spin in interpretation. However, given the  
12 urgent need for valid and reliable research on COVID-19 treatment and prevention, even a few  
13 important discrepancies could impact decision making. All COVID-19 studies, whether  
14 published as preprints or journal publications, should be critically evaluated for discrepancies in  
15 outcome reporting or spin, such as failure to report data on harms or overly optimistic  
16 conclusions.  
17  
18  
19  
20  
21  
22  
23  
24  
25  
26  
27  
28

29 Funding source: This study had no funding. Role of the funder: not applicable  
30  
31

32 Competing Interest Statement: All authors have completed the *Unified Competing Interest*  
33 *form* (available on request from the corresponding author) and declare: no support from any  
34 organisation for the submitted work; no financial relationships with any organisations that  
35 might have an interest in the submitted work in the previous three years. RF is a Cochrane  
36 employee and part of the development team for the Cochrane COVID-19 Study Register. No  
37 other authors declare any other relationships or activities that could appear to have influenced  
38 the submitted work.  
39  
40  
41  
42  
43  
44  
45  
46

47 Data access: LB had full access to all the data in the study and takes responsibility for the  
48 integrity of the data and the accuracy of the data analysis.  
49  
50  
51

52 Contributorship Statement: LB conceived the project, drafted the protocol, acquired data,  
53 conducted analysis, interpreted data, and drafted the paper. RL edited the protocol, acquired  
54  
55  
56  
57

1  
2  
3 data, conducted analysis, interpreted data, and revised the paper. LL edited the protocol,  
4 acquired data, conducted analysis, interpreted data, and revised the paper. KC edited the  
5 protocol, acquired data, conducted analysis, interpreted data, and revised the paper. SM  
6 edited the protocol, acquired data, conducted analysis, interpreted data, and revised the paper.  
7 MP edited the protocol, acquired data, conducted analysis, interpreted data, and revised the  
8 paper. QG edited the protocol, acquired data, conducted analysis, interpreted data, and  
9 revised the paper. LP edited the protocol, acquired data, conducted analysis, interpreted data,  
10 and revised the paper. SB edited the protocol, acquired data, conducted analysis, interpreted  
11 data, and revised the paper. JK edited the protocol, acquired data, conducted analysis,  
12 interpreted data, and revised the paper. RF edited the protocol, conducted the search,  
13 conducted analysis, interpreted data, and revised the paper. All authors (LB, RL, LL, KC, SM,  
14 MP, QG, LP, SB, JK, RF) have approved the final manuscript. LB serves as guarantor for all  
15 aspects of the work.  
16  
17  
18  
19  
20  
21  
22  
23  
24  
25  
26  
27  
28

29 Transparency declaration: LB affirms that the manuscript is an honest, accurate, and  
30 transparent account of the study being reported; that no important aspects of the study have  
31 been omitted; and that any discrepancies from the study as planned have been explained.  
32  
33  
34  
35

36 Data sharing statement: Data from this study is available in OSF project file (<https://osf.io/5ru8w/>).  
37  
38  
39  
40  
41  
42  
43  
44  
45  
46  
47  
48  
49  
50  
51  
52  
53  
54  
55  
56  
57  
58  
59  
60

## REFERENCES

- 1 All that's fit to preprint. *Nat Biotechnol* 2020;**38**:507–507. doi:10.1038/s41587-020-0536-x
- 2 Flanagan A, Fontanarosa PB, Bauchner H. Preprints involving medical research: do the benefits outweigh the challenges? *JAMA* 2020;**324**:1840. doi:10.1001/jama.2020.20674
- 3 Jung YE (Grace), Sun Y, Schluger NW. Effect and reach of medical articles posted on preprint servers during the COVID-19 pandemic. *JAMA Intern Med* Published Online First: 9 November 2020. doi:10.1001/jamainternmed.2020.6629
- 4 Kirkham JJ, Penfold NC, Murphy F, *et al*. Systematic examination of preprint platforms for use in the medical and biomedical sciences setting. *BMJ Open* 2020;**10**:e041849. doi:10.1136/bmjopen-2020-041849
- 5 Krumholz HM, Bloom T, Sever R, *et al*. Submissions and downloads of preprints in the first year of medRxiv. *JAMA* 2020;**324**:1903–5. doi:10.1001/jama.2020.17529
- 6 Krumholz HM, Bloom T, Ross J. Preprints can fill a void in times of rapidly changing science. STAT. 2020. <https://www.statnews.com/2020/01/31/preprints-fill-void-rapidly-changing-science/> (accessed 17 Dec 2020).
- 7 Bloom T. Shepherding preprints through a pandemic. *BMJ* 2020;**371**:m4703. doi:10.1136/bmj.m4703
- 8 Carneiro CFD, Queiroz VGS, Moulin TC, *et al*. Comparing quality of reporting between preprints and peer-reviewed articles in the biomedical literature. *Res Integr Peer Rev* 2020;**5**:16. doi:10.1186/s41073-020-00101-3
- 9 Klein M, Broadwell P, Farb SE, *et al*. Comparing published scientific journal articles to their pre-print versions. In: *Proceedings of the 16th ACM/IEEE-CS on Joint Conference on Digital Libraries*. New York, NY, USA: : Association for Computing Machinery 2016. 153–62. doi:10.1145/2910896.2910909
- 10 Nicolalde B, Añazco D, Mushtaq M, *et al*. Citations and publication rate of preprints on pharmacological interventions for COVID-19: the good, the bad and, the ugly. Version 2. *Res Sq* Published Online First: 8 September 2020. doi:10.21203/rs.3.rs-34689/v2
- 11 Kataoka Y, Oide S, Ariie T, *et al*. COVID-19 randomized controlled trials in medRxiv and PubMed. *Eur J Intern Med* 2020;**81**:97–9. doi:10.1016/j.ejim.2020.09.019
- 12 Oikonomidi T, Boutron I, Pierre O, *et al*. Changes in evidence for studies assessing interventions for COVID-19 reported in preprints: meta-research study. *BMC Med* 2020;**18**:402. doi:10.1186/s12916-020-01880-8

- 1  
2  
3 13 Hopewell S, Collins GS, Boutron I, *et al.* Impact of peer review on reports of randomised  
4 trials published in open peer review journals: retrospective before and after study. *BMJ*  
5 2014;**349**:g4145. doi:10.1136/bmj.g4145  
6
- 7  
8 14 Lazarus C, Haneef R, Ravaud P, *et al.* Peer reviewers identified spin in manuscripts of  
9 nonrandomized studies assessing therapeutic interventions, but their impact on spin in  
10 abstract conclusions was limited. *J Clin Epidemiol* 2016;**77**:44–51.  
11 doi:10.1016/j.jclinepi.2016.04.012  
12
- 13  
14 15 Chan A-W, Hróbjartsson A, Haahr MT, *et al.* Empirical evidence for selective reporting of  
15 outcomes in randomized trials: comparison of protocols to published articles. *JAMA*  
16 2004;**291**:2457. doi:10.1001/jama.291.20.2457  
17
- 18  
19 16 Mathieu S, Boutron I, Moher D, *et al.* Comparison of registered and published primary  
20 outcomes in randomized controlled trials. *JAMA* 2009;**302**:977–84.  
21 doi:10.1001/jama.2009.1242  
22
- 23  
24 17 Chiu K, Grundy Q, Bero L. ‘Spin’ in published biomedical literature: A methodological  
25 systematic review. *PLoS Biol* 2017;**15**:e2002173. doi:10.1371/journal.pbio.2002173  
26
- 27  
28 18 Boutron I, Ravaud P. Misrepresentation and distortion of research in biomedical literature.  
29 *Proc Natl Acad Sci* 2018;**115**:2613–9. doi:10.1073/pnas.1710755115  
30
- 31  
32 19 Bero L, Lawrence R, Leslie L, *et al.* Comparison of preprints with peer-reviewed publications  
33 on COVID-19: discrepancies in results reporting and conclusions. 2020.<https://osf.io/j62eu>  
(accessed 17 Dec 2020).  
34
- 35  
36 20 Harris PA, Taylor R, Thielke R, *et al.* Research electronic data capture (REDCap): a metadata-  
37 driven methodology and workflow process for providing translational research informatics  
38 support. *J Biomed Inform* 2009;**42**:377–81. doi:10.1016/j.jbi.2008.08.010  
39
- 40  
41 21 Zarin DA, Tse T, Williams RJ, *et al.* The ClinicalTrials.gov Results Database: update and key  
42 Issues. *N Engl J Med* 2011;**364**:852–60. doi:10.1056/NEJMsa1012065  
43
- 44  
45 22 Borba MGS, Val FFA, Sampaio VS, *et al.* Effect of High vs Low Doses of Chloroquine  
46 Diphosphate as Adjunctive Therapy for Patients Hospitalized With Severe Acute Respiratory  
47 Syndrome Coronavirus 2 (SARS-CoV-2) Infection: A Randomized Clinical Trial. *JAMA Netw*  
48 *Open* 2020;**3**:e208857. doi:10.1001/jamanetworkopen.2020.8857  
49
- 50  
51 23 Borba MGS, Val FFA, Sampaio VS, *et al.* Chloroquine diphosphate in two different dosages  
52 as adjunctive therapy of hospitalized patients with severe respiratory syndrome in the  
53 context of coronavirus (SARS-CoV-2) infection: Preliminary safety results of a randomized,  
54 double-blinded, phase IIb clinical trial (CloroCovid-19 Study). Version 1. *MedRxiv Prepr*  
55 2020;:2020.04.07.20056424. doi:10.1101/2020.04.07.20056424  
56  
57  
58  
59  
60



- 1  
2  
3 24 Tang W, Cao Z, Han M, *et al.* Hydroxychloroquine in patients with COVID-19: an open-label,  
4 randomized, controlled trial. Version 1. *MedRxiv Prepr* 2020;:2020.04.10.20060558.  
5 doi:10.1101/2020.04.10.20060558  
6  
7  
8 25 Tang W, Cao Z, Han M, *et al.* Hydroxychloroquine in patients with mainly mild to moderate  
9 coronavirus disease 2019: open label, randomised controlled trial. *BMJ* 2020;**369**:m1849.  
10 doi:10.1136/bmj.m1849  
11  
12 26 Weber AG, Chau AS, Egeblad M, *et al.* Nebulized in-line endotracheal dornase alfa and  
13 albuterol administered to mechanically ventilated COVID-19 patients: a case series.  
14 *MedRxiv Prepr* Published Online First: 15 May 2020. doi:10.1101/2020.05.13.20087734  
15  
16  
17 27 Weber AG, Chau AS, Egeblad M, *et al.* Nebulized in-line endotracheal dornase alfa and  
18 albuterol administered to mechanically ventilated COVID-19 patients: a case series. *Mol*  
19 *Med* 2020;**26**:91. doi:10.1186/s10020-020-00215-w  
20  
21  
22 28 Gautret P, Lagier J-C, Parola P, *et al.* Hydroxychloroquine and azithromycin as a treatment  
23 of COVID-19: results of an open-label non-randomized clinical trial. *medRxiv*  
24 2020;:2020.03.16.20037135. doi:10.1101/2020.03.16.20037135  
25  
26  
27 29 Gautret P, Lagier J-C, Parola P, *et al.* Hydroxychloroquine and azithromycin as a treatment  
28 of COVID-19: results of an open-label non-randomized clinical trial. *Int J Antimicrob Agents*  
29 2020;**56**:105949. doi:10.1016/j.ijantimicag.2020.105949  
30  
31  
32 30 Smith LE, Amlôt R, Lambert H, *et al.* Factors associated with adherence to self-isolation and  
33 lockdown measures in the UK; a cross-sectional survey. *MedRxiv Prepr*  
34 2020;:2020.06.01.20119040. doi:10.1101/2020.06.01.20119040  
35  
36  
37 31 Smith LE, Amlôt R, Lambert H, *et al.* Factors associated with adherence to self-isolation and  
38 lockdown measures in the UK: a cross-sectional survey. *Public Health* 2020;**187**:41–52.  
39 doi:10.1016/j.puhe.2020.07.024  
40  
41  
42 32 Chorin E, Wadhvani L, Magnani S, *et al.* QT interval prolongation and torsade de pointes in  
43 patients with COVID-19 treated with hydroxychloroquine/azithromycin. *Heart Rhythm*  
44 2020;**17**:1425–33. doi:10.1016/j.hrthm.2020.05.014  
45  
46  
47 33 Chorin E, Wadhvani L, Magnani S, *et al.* QT Interval Prolongation and Torsade De Pointes in  
48 Patients with COVID-19 treated with Hydroxychloroquine/Azithromycin. *MedRxiv Prepr*  
49 2020;:2020.04.27.20074583. doi:10.1101/2020.04.27.20074583  
50  
51  
52 34 Agarwal A, Mukherjee A, Kumar G, *et al.* Convalescent plasma in the management of  
53 moderate COVID-19 in India: an open-label parallel-arm phase II multicentre randomized  
54 controlled trial (PLACID Trial). Version 1. *MedRxiv Prepr* 2020;:2020.09.03.20187252.  
55 doi:10.1101/2020.09.03.20187252  
56  
57  
58  
59  
60

1  
2  
3  
4  
5  
6  
7  
8  
9  
10  
11  
12  
13  
14  
15  
16  
17  
18  
19  
20  
21  
22  
23  
24  
25  
26  
27  
28  
29  
30  
31  
32  
33  
34  
35  
36  
37  
38  
39  
40  
41  
42  
43  
44  
45  
46  
47  
48  
49  
50  
51  
52  
53  
54  
55  
56  
57  
58  
59  
60

35 Agarwal A, Mukherjee A, Kumar G, *et al.* Convalescent plasma in the management of moderate covid-19 in adults in India: open label phase II multicentre randomised controlled trial (PLACID Trial). *BMJ* 2020;**371**:m3939. doi:10.1136/bmj.m3939

For peer review only

**Table 1:** Discrepancies in Study Characteristics (n = 67 studies)

| Characteristic                  | No Discrepancies                                                  |                                                                     | Discrepancies                            |                                                      |                                                                                                                                                                                                                                                                                                                                                      |
|---------------------------------|-------------------------------------------------------------------|---------------------------------------------------------------------|------------------------------------------|------------------------------------------------------|------------------------------------------------------------------------------------------------------------------------------------------------------------------------------------------------------------------------------------------------------------------------------------------------------------------------------------------------------|
|                                 | Characteristics reported in both preprint and journal publication | Characteristics reported in neither preprint or journal publication | Characteristic reported in preprint only | Characteristics reported in journal publication only | Characteristic reported in both preprint and journal publication, but with discrepancies in content<br><br>Examples of discrepancies <sup>1</sup>                                                                                                                                                                                                    |
| <b>Title</b>                    | 47 (70%)                                                          | 0 (0%)                                                              | 0 (0%)                                   | 0 (0%)                                               | 20 (30%) <ul style="list-style-type: none"> <li>• Preprint includes study design in the title (n=4)</li> <li>• Journal publication includes study design in the title (n=5)</li> <li>• Change in study design description (n=5)</li> <li>• Change in population description (n=3)</li> <li>• Change in location description in both (n=3)</li> </ul> |
| <b>Authors</b>                  | 49 (73 %)                                                         | 0 (0%)                                                              | 0 (0%)                                   | 0 (0%)                                               | 18 (27%) <ul style="list-style-type: none"> <li>• Additional author(s) in preprint (n = 3)</li> <li>• Additional author(s) in journal publication (n = 9)</li> <li>• Change in author order (n = 6)</li> <li>• Change in spelling, wording, or order of author first/last names (n= 2)</li> </ul>                                                    |
| <b>Disclosed Funding source</b> | 44 (66%)                                                          | 3 (4%)                                                              | 8 (12%)                                  | 2 (3%)                                               | 10 (15%) <ul style="list-style-type: none"> <li>• Additional funding sources in journal publication (n = 4)</li> </ul>                                                                                                                                                                                                                               |

|                                                  |          |         |        |        |                                                                                                                                                                                                                                                                                                                                                                                                                                                                              |
|--------------------------------------------------|----------|---------|--------|--------|------------------------------------------------------------------------------------------------------------------------------------------------------------------------------------------------------------------------------------------------------------------------------------------------------------------------------------------------------------------------------------------------------------------------------------------------------------------------------|
|                                                  |          |         |        |        | <ul style="list-style-type: none"> <li>Funding statement in preprint provides more detail(n = 1)</li> <li>Funding statement in journal publication provides more detail(n = 2)</li> </ul>                                                                                                                                                                                                                                                                                    |
| <b>Conflict of Interest Disclosure statement</b> | 50 (75%) | 1 (1%)  | 5 (8%) | 1 (1%) | 10 (15%) <ul style="list-style-type: none"> <li>Additional conflicts reported in journal publication (n = 8)</li> <li>Additional conflicts reported in preprint (n = 1)</li> <li>Additional detail included in journal publication (n = 2)</li> </ul>                                                                                                                                                                                                                        |
| <b>Ethics approval</b>                           | 59 (88%) | 3 (5%)  | 1 (1%) | 0 (0%) | 4 (6%) <ul style="list-style-type: none"> <li>preprint contains approval number but journal publication does not (N=1); preprint states approval was waived and journal publication states it was not needed (n=1); preprint contains no information on ethics approval, while journal publication describes the approvals (n = 1); preprints state consent was approved prior to sample collection while article states it was approved from next of kin (n = 1)</li> </ul> |
| <b>Location of study</b>                         | 63 (94%) | 4 (6 %) | 0 (0%) | 0 (0%) | 0 (0%)                                                                                                                                                                                                                                                                                                                                                                                                                                                                       |
| <b>Number of participants</b>                    | 61 (91%) | 0 (0%)  | 0 (0%) | 0 (0%) | 6 (9%) <ul style="list-style-type: none"> <li>Journal publication has larger analytic</li> </ul>                                                                                                                                                                                                                                                                                                                                                                             |

|                                 |          |        |        |        |                                                                                                                                                                                                                                                                                                                                                                                            |
|---------------------------------|----------|--------|--------|--------|--------------------------------------------------------------------------------------------------------------------------------------------------------------------------------------------------------------------------------------------------------------------------------------------------------------------------------------------------------------------------------------------|
|                                 |          |        |        |        | sample size than preprint (n = 2); Journal publication has smaller analytic sample size than preprint (n=1); different numbers of patients recruited, but same number randomized; 284 patients recruited in preprint, 267 in journal publication (n = 1); numbers do not match for any sampling or analysis (n = 1); typographical error (n = 1)                                           |
| <b>Participant demographics</b> | 38 (58%) | 3 (4%) | 0 (0%) | 1 (1%) | 25 (37%) <ul style="list-style-type: none"> <li>Journal publication includes additional demographic categories (n=10)</li> <li>Preprint includes additional demographic categories (n = 4)</li> <li>Preprint and journal publication report different values for the same demographic characteristics (n = 11)</li> <li>Demographic data report using different metrics (n = 6)</li> </ul> |
| <b>Tables and Figures</b>       | 18 (27%) | 0 (0%) | 0 (0%) | 0 (0%) | 49 (73%) <ul style="list-style-type: none"> <li>Journal publication includes additional tables/figures (n=25)</li> <li>Preprint includes additional tables/figures (n=10)</li> </ul>                                                                                                                                                                                                       |

|                                  |          |         |        |        |                                                                                                                                                                                                                                                                                                                                                                             |
|----------------------------------|----------|---------|--------|--------|-----------------------------------------------------------------------------------------------------------------------------------------------------------------------------------------------------------------------------------------------------------------------------------------------------------------------------------------------------------------------------|
|                                  |          |         |        |        | <ul style="list-style-type: none"> <li>• Additional data in journal publication tables (n = 14)</li> <li>• Additional data in preprint tables/figures (n = 6)</li> <li>• Change in order of tables/figures (n = 4)</li> <li>• Change in metrics (eg. mean vs. median) (n = 15)</li> <li>• Change in labels (n = 5)</li> <li>• Numbers reported differed (n = 16)</li> </ul> |
| <b>Discussion of limitations</b> | 27 (40%) | 7 (11%) | 0 (0%) | 2 (3%) | 31 (46%) <ul style="list-style-type: none"> <li>• More limitations listed in journal publication than preprint (n=28)</li> <li>• More limitations listed in preprint than journal publication (n=1)</li> </ul>                                                                                                                                                              |

<sup>1</sup> Ns do not add to number of discrepancies between preprints and journal publications as some studies could have more than one discrepancy and not all discrepancies have been included as examples.

**Table 2:** Discrepancies in Number of Outcomes Reported (N= 67 studies)

| Type of Discrepancy                                 | Number (%) of studies with at least 1 outcome that was reported only in the preprint or journal publication (n=67) | Number and description of outcomes across all studies that were reported only in the preprint or journal publication                                                                                                                                                                                                                                                                                                                                                                                                                                                                                                                                                                                                                                                                                                                                                                                                                                                                                                                      |
|-----------------------------------------------------|--------------------------------------------------------------------------------------------------------------------|-------------------------------------------------------------------------------------------------------------------------------------------------------------------------------------------------------------------------------------------------------------------------------------------------------------------------------------------------------------------------------------------------------------------------------------------------------------------------------------------------------------------------------------------------------------------------------------------------------------------------------------------------------------------------------------------------------------------------------------------------------------------------------------------------------------------------------------------------------------------------------------------------------------------------------------------------------------------------------------------------------------------------------------------|
| <b>Outcome reported in journal publication only</b> | 15 (22%)                                                                                                           | N = 19 (numbering indicates unique studies, lettering indicates outcomes from the same study) <ol style="list-style-type: none"> <li>1a) Treatment-associated toxicities</li> <li>1b) Adverse reactions</li> <li>2) Survival at ICU discharge</li> <li>3) Creatine phosphokinase</li> <li>4) Radiographic scale for acute respiratory distress syndrome</li> <li>5) Time to negative swab</li> <li>6) Time to RT-PCR negativity</li> <li>7) Clinical outcomes at discharge</li> <li>8) Ventilator status of those remaining hospitalized at end of follow up</li> <li>9a) Secondary composite - cardiovascular complications</li> <li>9b) Acute renal failure</li> <li>10) Creatinine phosphokinase</li> <li>11) Sequential organ failure assessment score</li> <li>12) Length of stay</li> <li>13) WHO Clinical Progression Scale</li> <li>14a) sCD14 levels related to corticoid treatment</li> <li>14b) Hospital Stay</li> <li>14c) Onset of symptoms</li> <li>15) Mechanical ventilation or all-cause mortality at 21 days</li> </ol> |
| <b>Outcome reported in preprint only</b>            | 8 (12%)                                                                                                            | N = 17 (numbering indicates unique studies, lettering indicates outcomes from the same study) <ol style="list-style-type: none"> <li>1a) Oxygen support need</li> <li>1b) Invasive mechanical ventilation need</li> <li>1c) ICU need</li> <li>1d) Need for inotropics</li> <li>1e) Naso/oropharyngeal swab viral clearance</li> <li>2a) Final lymphocyte (cell/mm<sup>3</sup>)</li> </ol>                                                                                                                                                                                                                                                                                                                                                                                                                                                                                                                                                                                                                                                 |

|  |  |                                                                                                                                                                                                                                                                                                                                                                                                                                                                                                                                                                                              |
|--|--|----------------------------------------------------------------------------------------------------------------------------------------------------------------------------------------------------------------------------------------------------------------------------------------------------------------------------------------------------------------------------------------------------------------------------------------------------------------------------------------------------------------------------------------------------------------------------------------------|
|  |  | <p>2b) Final CRP (mg/L)</p> <p>3a) Negative conversion of SARS-CoV-2 by 28 days</p> <p>3b) Negative conversion rate at 4-, 7-, 10-, 14- or 21-day</p> <p>3c) Changes of CRP values and blood lymphocyte count</p> <p>3d) Rate of symptoms alleviation within 28-day</p> <p>3e) Safety endpoints</p> <p>4) QTc <math>\geq</math> 470 ms</p> <p>5) Cumulative virus clearance rate vs different antiviral regimes in [a] all patients and [b] patients with moderate illness</p> <p>6) Adverse events</p> <p>7) Composite cardiovascular and renal failure</p> <p>8) Nosocomial infections</p> |
|--|--|----------------------------------------------------------------------------------------------------------------------------------------------------------------------------------------------------------------------------------------------------------------------------------------------------------------------------------------------------------------------------------------------------------------------------------------------------------------------------------------------------------------------------------------------------------------------------------------------|

For peer review only



**Table 3:** Discrepancies in Components of Results Reporting for Outcomes Reported in Both Preprints and Journal Publications (N= 67 studies; 258 outcomes)

| Type of Discrepancy                        | Number (%) of studies with at least 1 discrepancy between the preprint and journal publication (n=67) | Number (%) of outcomes across all studies that were discrepant between the preprint and journal publication (n=258) | Descriptive Examples <sup>1</sup>                                                                                                                                                                                                                                                                                                                                        |
|--------------------------------------------|-------------------------------------------------------------------------------------------------------|---------------------------------------------------------------------------------------------------------------------|--------------------------------------------------------------------------------------------------------------------------------------------------------------------------------------------------------------------------------------------------------------------------------------------------------------------------------------------------------------------------|
| <b>Outcome measurement</b>                 | 6 (9%)                                                                                                | 8 (3%)                                                                                                              | <ul style="list-style-type: none"> <li>- Journal publication contains more detail on how outcome was measured compared to preprint (n=3)</li> <li>- Journal publication reports an additional or different measurement than the one used for the same outcome in the preprint (e.g., preprint reports 4 adverse events, journal publication reports 12) (n=4)</li> </ul> |
| <b>Units of measurement</b>                | 3 (4%)                                                                                                | 3 (1%)                                                                                                              | <ul style="list-style-type: none"> <li>- e.g., journal publication reports events, total and percentage for mortality, preprint reports only percentage; median (IQR) reported in journal publication, mean (SD) in preprint</li> </ul>                                                                                                                                  |
| <b>Timepoint assessment was made</b>       | 10 (15%)                                                                                              | 24 (9%)                                                                                                             | <ul style="list-style-type: none"> <li>- Journal publication reports outcomes measured over a longer timepoint than preprint (n=13)</li> <li>- Journal publication reports additional interim time points compared to preprint (n=3)</li> </ul>                                                                                                                          |
| <b>Numerical values reported</b>           | 24 (36%)                                                                                              | 52 (20%)                                                                                                            | <ul style="list-style-type: none"> <li>- Differences in number of events or measurement values reported (n=17)</li> <li>- Differences in numbers of participants or denominators (n = 5)</li> <li>- More adverse events reported in journal publication than preprint (n = 4)</li> </ul>                                                                                 |
| <b>Finding of statistical significance</b> | 11 (16%)                                                                                              | 16 (6%)                                                                                                             | <ul style="list-style-type: none"> <li>- Different p-value reported with no change in significance (n=3)</li> </ul>                                                                                                                                                                                                                                                      |

|                                                                  |          |          |                                                                                                                                                                                                                                                                                                                                              |
|------------------------------------------------------------------|----------|----------|----------------------------------------------------------------------------------------------------------------------------------------------------------------------------------------------------------------------------------------------------------------------------------------------------------------------------------------------|
|                                                                  |          |          | <ul style="list-style-type: none"> <li>- Different p-value reported with change in significance; significant result reported in journal publication (n=1)</li> <li>- In multivariate models, journal publication and preprint report different variables as being statistically significant (n=2)</li> </ul>                                 |
| <b>Statistical tests performed</b>                               | 17 (25%) | 31 (12%) | <ul style="list-style-type: none"> <li>- Journal publication contains additional statistical analysis compared to preprint (n=7)</li> <li>- Journal publication uses different statistical adjustments compared to preprint (n=7)</li> <li>- Journal publication and preprint use different statistical tests for same data (n=3)</li> </ul> |
| <b>Subgroup analyses conducted</b>                               | 14 (21%) | 24 (9%)  | <ul style="list-style-type: none"> <li>- Journal publication includes subgroup analysis not included in preprint (n=6)</li> <li>- Journal publication finds statistically significant interaction for subgroup, preprint does not (n=1)</li> </ul>                                                                                           |
| <b>Identifying the outcome as a primary or secondary outcome</b> | 1 (1%)   | 3 (1%)   | <ul style="list-style-type: none"> <li>- e.g., preprint identifies the primary endpoint as safety; journal publication adds the secondary endpoint of exploration of efficacy</li> </ul>                                                                                                                                                     |

<sup>1</sup> Ns do not add to number of reported discrepancies as some studies could have more than one discrepancy and not all discrepancies have been included as examples.

Table 4: Categories of Spin in Preprints and Journal Publications (n = 67 studies)

| Spin Categories and Subcategories <sup>1</sup>                                                                                        | No Spin<br>N (%) | Occurred in<br>preprint and journal<br>publication<br>N (%) | Occurred in<br>preprint only<br>N (%) | Occurred in<br>journal<br>publication only<br>N (%) |
|---------------------------------------------------------------------------------------------------------------------------------------|------------------|-------------------------------------------------------------|---------------------------------------|-----------------------------------------------------|
| <b>Any Category of Spin<sup>2</sup></b>                                                                                               | <b>37 (55%)</b>  | <b>23 (34%)</b>                                             | <b>5 (7%)</b>                         | <b>2 (3%)</b>                                       |
| <b>Category</b>                                                                                                                       |                  |                                                             |                                       |                                                     |
| <b>Inappropriate interpretation<br/>given study design<sup>3</sup></b>                                                                | <b>55 (82%)</b>  | <b>7 (10%)</b>                                              | <b>4 (6%)</b>                         | <b>1 (1%)</b>                                       |
| Subcategory                                                                                                                           |                  |                                                             |                                       |                                                     |
| Claiming causality in non-<br>randomized studies                                                                                      | 62 (93%)         | 4 (6%)                                                      | 1 (1%)                                | 0 (0%)                                              |
| Interpreting a lack of statistical<br>significance as equivalence                                                                     | 66 (99%)         | 0 (0%)                                                      | 0 (0%)                                | 1 (1%)                                              |
| Interpreting a lack of statistical<br>significance of harm measures<br>as safety                                                      | 65 (97%)         | 1 (1.5%)                                                    | 0 (0%)                                | 1 (1.5%)                                            |
| Claim of any significant<br>difference despite lack of<br>statistical test                                                            | 67 (100%)        | 0 (0%)                                                      | 0 (0%)                                | 0 (0%)                                              |
| Other                                                                                                                                 | 61 (91%)         | 2 (3%)                                                      | 4 (6%)                                | 0 (0%)                                              |
|                                                                                                                                       |                  |                                                             |                                       |                                                     |
| <b>Inappropriate extrapolations<br/>or recommendations</b>                                                                            | <b>52 (78%)</b>  | <b>13 (19%)</b>                                             | <b>2 (3%)</b>                         | <b>0 (0%)</b>                                       |
| Subcategory                                                                                                                           |                  |                                                             |                                       |                                                     |
| Suggestion that the treatment<br>or test is more clinically<br>relevant or useful than is<br>justified given the study design.        | 60 (90%)         | 6 (9%)                                                      | 1 (1%)                                | 0(0%)                                               |
| Recommendations made to<br>population groups / contexts<br>outside of those investigated.                                             | 63 (94%)         | 3 (5%)                                                      | 1 (1%)                                | 0 (0%)                                              |
| (Observational) Expressing<br>confidence in a treatment or<br>test without suggesting the<br>need for further confirmatory<br>studies | 66 (99%)         | 0 (0%)                                                      | 1 (1%)                                | 0 (0%)                                              |
| (Observational) Making<br>recommendations without<br>stating an RCT should be done<br>to validate the<br>recommendation               | 65 (97%)         | 2 (3%)                                                      | 0 (0%)                                | 0 (0%)                                              |
| Other                                                                                                                                 | 63 (94%)         | 3 (5%)                                                      | 1 (1%)                                | 0 (0%)                                              |
|                                                                                                                                       |                  |                                                             |                                       |                                                     |

| <b>Selective focusing on positive results or more favorable data presentation</b>                                         | <b>54 (81%)</b> | <b>8 (12%)</b> | <b>2 (3%)</b> | <b>3 (4%)</b> |
|---------------------------------------------------------------------------------------------------------------------------|-----------------|----------------|---------------|---------------|
| Subcategory                                                                                                               |                 |                |               |               |
| Discussing only significant (non-primary) results to distract from non-significant (primary results)                      | 66 (99%)        | 0 (0%)         | 1 (1%)        | 0 (0%)        |
| Omitting non-significant results from Abstract/Discussion/Conclusion                                                      | 65 (97%)        | 1 (1.5%)       | 0 (0%)        | 1 (1.5%)      |
| Claiming significant effects for non-significant results                                                                  | 67 (100%)       | 0 (0%)         | 0 (0%)        | 0 (0%)        |
| Acknowledge statistically nonsignificant results for the primary outcome but emphasize the beneficial effect of treatment | 66 (99%)        | 1 (1%)         | 0 (0%)        | 0 (0%)        |
| Describing non-significant results as "trending towards significance"                                                     | 66 (99%)        | 1 (1%)         | 0 (0%)        | 0 (0%)        |
| Mentioning adverse events in the abstract/discussion/conclusion but minimizing their potential effect or importance.      | 64 (96%)        | 2 (3%)         | 1 (1%)        | 0 (0%)        |
| Misleading description of study design as one that is more robust                                                         | 67 (100%)       | 0 (0%)         | 0 (0%)        | 0 (0%)        |
| No considerations of the limitations of the study                                                                         | 64 (96%)        | 3 (4%)         | 0 (0%)        | 0 (0%)        |
| Use of linguistic spin                                                                                                    | 66 (99%)        | 0 (0%)         | 0 (0%)        | 1 (1%)        |
| Other                                                                                                                     | 62 (93%)        | 1 (1%)         | 2 (3%)        | 2 (3%)        |

<sup>1</sup> Subcategories of spin are not mutually exclusive; a preprint or journal publications could contain multiple subcategories of spin within a category. Preprints and journal publications could contain different subcategories of spin within a category.

<sup>2</sup> This row shows counts of at least one instance of spin in any category. Column category and subcategory counts add to greater than any occurrence of spin because multiple categories and subcategories of spin could occur within a preprint or article publication. Row percents do not add to 100 due to rounding.

<sup>3</sup> Row percents may not add to 100 due to rounding

1  
2  
3 **Figure legend:**  
4  
5

6  
7 **Figure 1. Flowchart of study inclusion**  
8  
9  
10  
11  
12  
13  
14  
15  
16  
17  
18  
19  
20  
21  
22  
23  
24  
25  
26  
27  
28  
29  
30  
31  
32  
33  
34  
35  
36  
37  
38  
39  
40  
41  
42  
43  
44  
45  
46  
47  
48  
49  
50  
51  
52  
53  
54  
55  
56  
57  
58  
59  
60

For peer review only

1  
2  
3  
4  
5  
6  
7  
8  
9  
10  
11  
12  
13  
14  
15  
16  
17  
18  
19  
20  
21  
22  
23  
24  
25  
26  
27  
28  
29  
30  
31  
32  
33  
34  
35  
36  
37  
38  
39  
40  
41  
42  
43  
44  
45  
46  
47  
48  
49  
50  
51  
52  
53  
54  
55  
56  
57  
58  
59  
60



1  
2  
3 **Supplemental Files**  
4  
5

6 **Table S1: Timing of preprint to journal publication (days)**

7 **Table S2: Sensitivity Analysis of Discrepancies in Study Characteristics**

8 **Table S3: Sensitivity Analysis of Discrepancies in Outcome Reporting**

9 **Table S4: Sensitivity Analysis of Categories of Spin in Preprints and Journal**  
10 **Publications**  
11  
12  
13  
14  
15  
16  
17  
18  
19  
20  
21  
22  
23  
24  
25  
26  
27  
28  
29  
30  
31  
32  
33  
34  
35  
36  
37  
38  
39  
40  
41  
42  
43  
44  
45  
46  
47  
48  
49  
50  
51  
52  
53  
54  
55  
56  
57  
58  
59  
60

For peer review only

**Table S1: Timing of preprint to journal publication (days)**

|                                                                      | <b>Days from preprint to published, mean (range)</b> |
|----------------------------------------------------------------------|------------------------------------------------------|
| <b>All Studies (n=67)</b>                                            | 65.4 (0 - 271)                                       |
| <b>Subgroup: Preprint posted before submission to journal (n=32)</b> | 87.1 (10 - 271)                                      |
| <b>Subgroup: Preprint posted after submission to journal (n=27)</b>  | 52.2 (0 - 120)                                       |



**Table S2: Sensitivity Analysis of Discrepancies in Study Characteristics (n=60) <sup>a</sup>**

|                                  | No Discrepancies             |                                 | Discrepancies                                      |                                       |                                                     |
|----------------------------------|------------------------------|---------------------------------|----------------------------------------------------|---------------------------------------|-----------------------------------------------------|
|                                  | Reported in Both,<br>No. (%) | Reported in Neither,<br>No. (%) | Reported in Both<br>With Discrepancies,<br>No. (%) | Reported in Preprint<br>Only, No. (%) | Reported in Journal<br>Publication Only, No.<br>(%) |
| <b>Title</b>                     | 44 (73)                      | 0 (0)                           | 16 (27)                                            | 0 (0)                                 | 0 (0)                                               |
| <b>Authors</b>                   | 43 (72)                      | 0 (0)                           | 17 (28)                                            | 0 (0)                                 | 0 (0)                                               |
| <b>Disclosed Funding Source</b>  | 39 (65)                      | 3 (5)                           | 10 (17)                                            | 6 (10)                                | 2 (3)                                               |
| <b>COI Disclosure Statement</b>  | 45 (75)                      | 1 (2)                           | 9 (15)                                             | 4 (7)                                 | 1 (2)                                               |
| <b>Ethics Approval</b>           | 54 (90)                      | 2 (3)                           | 4 (7)                                              | 0 (0)                                 | 0 (0)                                               |
| <b>Location of Study</b>         | 56 (93)                      | 4 (7)                           | 0 (0)                                              | 0 (0)                                 | 0 (0)                                               |
| <b>Number of Participants</b>    | 54 (90)                      | 0 (0)                           | 6 (10)                                             | 0 (0)                                 | 0 (0)                                               |
| <b>Participant Demographics</b>  | 34 (57)                      | 3 (5)                           | 22 (37)                                            | 0 (0)                                 | 1 (2)                                               |
| <b>Tables and Figures</b>        | 15 (25)                      | 0 (0)                           | 45 (75)                                            | 0 (0)                                 | 0 (0)                                               |
| <b>Discussion of Limitations</b> | 23 (38)                      | 6 (10)                          | 30 (50)                                            | 0 (0)                                 | 1 (2)                                               |

<sup>a</sup> Studies that had a preprint posted on-or-after the date of revision, acceptance, or publication were removed. This removed 1 study. Due to differences in journal reporting of these dates, there was overlap in those studies and no comparison in others. Therefore, we expanded the studies removed to include those with preprints posted 1-7 days before the date of revision, acceptance, or publication, thus removing 7 studies from the sensitivity analysis.

**Table S3: Sensitivity Analysis of Discrepancies in Outcome Reporting (n=60)<sup>a</sup>**

|                                                                  | <b>Number (%) of studies with at least 1 discrepancy<br/>n=60</b> | <b>Number (%) of Outcomes<br/>n=242</b> |
|------------------------------------------------------------------|-------------------------------------------------------------------|-----------------------------------------|
| <b>Outcome in journal publication only</b>                       | 14 (23)                                                           | 18 (7)                                  |
| <b>Outcome in preprint only</b>                                  | 7 (12)                                                            | 16 (7)                                  |
| <b>Outcome measurement</b>                                       | 5 (8)                                                             | 7 (3)                                   |
| <b>Units of measurement</b>                                      | 3 (5)                                                             | 3 (1)                                   |
| <b>Timepoint assessment was made</b>                             | 10 (17)                                                           | 24 (10)                                 |
| <b>Numerical values reported</b>                                 | 23 (38)                                                           | 49 (20)                                 |
| <b>Finding of statistical significance</b>                       | 11 (18)                                                           | 16 (7)                                  |
| <b>Statistical tests performed</b>                               | 16 (27)                                                           | 30 (12)                                 |
| <b>Subgroup analyses conducted</b>                               | 13 (22)                                                           | 23 (10)                                 |
| <b>Identifying the outcome as a primary or secondary outcome</b> | 1 (2)                                                             | 3 (1)                                   |

<sup>a</sup> Studies that had a preprint posted on-or-after the date of revision, acceptance, or publication were removed. This removed 1 study. Due to differences in journal reporting of these dates, there was overlap in those studies and no comparison in others. Therefore, we expanded the studies removed to include those with preprints posted 1-7 days before the date of revision, acceptance, or publication, thus removing 7 studies from the sensitivity analysis.

**Table S4: Sensitivity Analysis of Categories of Spin in Preprints and Journal Publications (n=60) <sup>a</sup>**

|                                                                                                                           | <b>Neither, No. (%)</b> | <b>Both, No. (%)</b> | <b>Preprint Only, No. (%)</b> | <b>Journal Publication Only, No. (%)</b> |
|---------------------------------------------------------------------------------------------------------------------------|-------------------------|----------------------|-------------------------------|------------------------------------------|
| <b>Inappropriate interpretation given study design</b>                                                                    | <b>49 (82)</b>          | <b>6 (10)</b>        | <b>4 (7)</b>                  | <b>1 (2)</b>                             |
| Claiming causality in non-randomized studies                                                                              | 56 (93)                 | 3 (5)                | 1 (2)                         | 0 (0)                                    |
| Interpreting a lack of statistical significance as equivalence                                                            | 59 (98)                 | 0 (0)                | 0 (0)                         | 1 (2)                                    |
| Interpreting a lack of statistical significance of harm measures as safety                                                | 58 (97)                 | 1 (2)                | 0 (0)                         | 1 (2)                                    |
| Claim of any significant difference despite lack of statistical test                                                      | 60 (100)                | 0 (0)                | 0 (0)                         | 0 (0)                                    |
| Other                                                                                                                     | 54 (90)                 | 2 (3)                | 4 (7)                         | 0 (0)                                    |
|                                                                                                                           |                         |                      |                               |                                          |
| <b>Inappropriate extrapolations or recommendations</b>                                                                    | <b>46 (77)</b>          | <b>12 (20)</b>       | <b>2 (3)</b>                  | <b>0 (0)</b>                             |
| Suggestion that the treatment or test is more clinically relevant or useful than is justified given the study design.     | 54 (90)                 | 5 (8)                | 1 (2)                         | 0 (0)                                    |
| Recommendations made to population groups / contexts outside of those investigated.                                       | 56 (93)                 | 3 (5)                | 1 (2)                         | 0 (0)                                    |
| (Observational) Expressing confidence in a treatment or test without suggesting the need for further confirmatory studies | 59 (98)                 | 0 (0)                | 1 (2)                         | 0 (0)                                    |
| (Observational) Making recommendations without stating an RCT should be done to validate the recommendation               | 59 (98)                 | 1 (2)                | 0 (0)                         | 0 (0)                                    |
| Other                                                                                                                     | 56 (93)                 | 3 (5)                | 1 (2)                         | 0 (0)                                    |
|                                                                                                                           |                         |                      |                               |                                          |
| <b>Selective focusing on positive results or more favorable data presentation</b>                                         | <b>48 (80)</b>          | <b>7 (12)</b>        | <b>2 (3)</b>                  | <b>3 (5)</b>                             |
| Discussing only significant (non-primary) results to distract from non-significant (primary results)                      | 59 (98)                 | 0 (0)                | 1 (2)                         | 0 (0)                                    |
| Omitting non-significant results from Abstract/Discussion/Conclusion                                                      | 58 (97)                 | 1 (2)                | 0 (0)                         | 1 (2)                                    |
| Claiming significant effects for non-significant results                                                                  | 60 (100)                | 0 (0)                | 0 (0)                         | 0 (0)                                    |
| Acknowledge statistically nonsignificant results for the primary outcome but emphasize the beneficial effect of treatment | 59 (98)                 | 1 (2)                | 0 (0)                         | 0 (0)                                    |

|                                                                                                                      |          |       |       |       |
|----------------------------------------------------------------------------------------------------------------------|----------|-------|-------|-------|
| Describing non-significant results as "trending towards significance"                                                | 59 (98)  | 1 (2) | 0 (0) | 0 (0) |
| Mentioning adverse events in the abstract/discussion/conclusion but minimizing their potential effect or importance. | 58 (97)  | 1 (2) | 1 (2) | 0 (0) |
| Misleading description of study design as one that is more robust                                                    | 60 (100) | 0 (0) | 0 (0) | 0 (0) |
| No considerations of the limitations of the study                                                                    | 58 (97)  | 2 (3) | 0 (0) | 0 (0) |
| Use of linguistic spin                                                                                               | 59 (98)  | 0 (0) | 0 (0) | 1 (2) |
| Other                                                                                                                | 55 (92)  | 1 (2) | 2 (3) | 2 (3) |

<sup>a</sup> Studies that had a preprint posted on-or-after the date of revision, acceptance, or publication were removed. This removed 1 study. Due to differences in journal reporting of these dates, there was overlap in those studies and no comparison in others. Therefore, we expanded the studies removed to include those with preprints posted 1-7 days before the date of revision, acceptance, or publication, thus removing 7 studies from the analysis

## STROBE Statement—checklist of items that should be included in reports of observational studies

|                           | Item No | Recommendation                                                                                                                                                                                                                                                                                                                                                                                                                                                         | Included                                                                                              | Reference                                                                                                                               |
|---------------------------|---------|------------------------------------------------------------------------------------------------------------------------------------------------------------------------------------------------------------------------------------------------------------------------------------------------------------------------------------------------------------------------------------------------------------------------------------------------------------------------|-------------------------------------------------------------------------------------------------------|-----------------------------------------------------------------------------------------------------------------------------------------|
| <b>Title and abstract</b> | 1       | (a) Indicate the study's design with a commonly used term in the title or the abstract                                                                                                                                                                                                                                                                                                                                                                                 | Yes                                                                                                   | in abstract                                                                                                                             |
|                           |         | (b) Provide in the abstract an informative and balanced summary of what was done and what was found                                                                                                                                                                                                                                                                                                                                                                    | Yes                                                                                                   | Page 5                                                                                                                                  |
| <b>Introduction</b>       |         |                                                                                                                                                                                                                                                                                                                                                                                                                                                                        |                                                                                                       |                                                                                                                                         |
| Background/rationale      | 2       | Explain the scientific background and rationale for the investigation being reported                                                                                                                                                                                                                                                                                                                                                                                   | Yes                                                                                                   | Pages 6-7                                                                                                                               |
| Objectives                | 3       | State specific objectives, including any prespecified hypotheses                                                                                                                                                                                                                                                                                                                                                                                                       | Yes                                                                                                   | Page 7, para 2                                                                                                                          |
| <b>Methods</b>            |         |                                                                                                                                                                                                                                                                                                                                                                                                                                                                        |                                                                                                       |                                                                                                                                         |
| Study design              | 4       | Present key elements of study design early in the paper                                                                                                                                                                                                                                                                                                                                                                                                                | Yes                                                                                                   | Presented as subheadings in methods section                                                                                             |
| Setting                   | 5       | Describe the setting, locations, and relevant dates, including periods of recruitment, exposure, follow-up, and data collection                                                                                                                                                                                                                                                                                                                                        | Yes                                                                                                   | Abstract and pages 8-9                                                                                                                  |
| Participants              | 6       | (a) <i>Cohort study</i> —Give the eligibility criteria, and the sources and methods of selection of participants. Describe methods of follow-up<br><i>Case-control study</i> —Give the eligibility criteria, and the sources and methods of case ascertainment and control selection. Give the rationale for the choice of cases and controls<br><i>Cross-sectional study</i> —Give the eligibility criteria, and the sources and methods of selection of participants | <i>Cohort study</i> -<br>NA<br><br><i>Case-control</i> -<br>NA<br><br><i>Cross-sectional</i> -<br>YES | <i>Cross-sectional study – Eligibility criteria</i> : Inclusion exclusion criteria. Pages 9-10. <i>Sources of selection</i> : Page 8-9. |
|                           |         | (b) <i>Cohort study</i> —For matched studies, give matching criteria and number of exposed and unexposed<br><i>Case-control study</i> —For matched studies, give matching                                                                                                                                                                                                                                                                                              | <i>Cohort study</i><br>NA<br><br><i>Case-control</i> -<br>NA                                          |                                                                                                                                         |

|                              |    |                                                                                                                                                                                                                                                                                                           |                                                                                                   |                                                                                                                              |
|------------------------------|----|-----------------------------------------------------------------------------------------------------------------------------------------------------------------------------------------------------------------------------------------------------------------------------------------------------------|---------------------------------------------------------------------------------------------------|------------------------------------------------------------------------------------------------------------------------------|
|                              |    | criteria and the number of controls per case                                                                                                                                                                                                                                                              |                                                                                                   |                                                                                                                              |
| Variables                    | 7  | Clearly define all outcomes, exposures, predictors, potential confounders, and effect modifiers. Give diagnostic criteria, if applicable                                                                                                                                                                  | Yes                                                                                               | <i>Outcomes-</i> Study characteristics. Page 10<br>Primary outcomes of Results Reporting and Spin. Page 11-13.               |
| Data sources/<br>measurement | 8* | For each variable of interest, give sources of data and details of methods of assessment (measurement). Describe comparability of assessment methods if there is more than one group                                                                                                                      | Yes                                                                                               | <i>Data Sources-</i> Data Sources and Search Strategy. Page 8<br><br><i>Methods of assessment-</i> Data extraction: Page 10. |
| Bias                         | 9  | Describe any efforts to address potential sources of bias                                                                                                                                                                                                                                                 | Yes                                                                                               | Data extraction. Duplicate coding, Data extraction instrument. Page 10.                                                      |
| Study size                   | 10 | Explain how the study size was arrived at                                                                                                                                                                                                                                                                 | NA                                                                                                | A universal sample - All studies that met our inclusion and exclusion criteria were included.                                |
| Quantitative variables       | 11 | Explain how quantitative variables were handled in the analyses. If applicable, describe which groupings were chosen and why                                                                                                                                                                              | Yes                                                                                               | Analysis. Page 13.                                                                                                           |
| Statistical methods          | 12 | (a) Describe all statistical methods, including those used to control for confounding                                                                                                                                                                                                                     | Yes                                                                                               | Analysis: Page 13                                                                                                            |
|                              |    | (b) Describe any methods used to examine subgroups and interactions                                                                                                                                                                                                                                       | Yes                                                                                               | Sensitivity analysis: Page 13. No subgroup analysis.                                                                         |
|                              |    | (c) Explain how missing data were addressed                                                                                                                                                                                                                                                               | NA                                                                                                | No missing data as preprints and final publications were obtained for each included study.                                   |
|                              |    | (d) <i>Cohort study</i> —If applicable, explain how loss to follow-up was addressed<br><i>Case-control study</i> —If applicable, explain how matching of cases and controls was addressed<br><i>Cross-sectional study</i> —If applicable, describe analytical methods taking account of sampling strategy | <i>Cohort study-</i><br>NA<br><br><i>Case-control-</i><br>NA<br><br><i>Cross-sectional-</i><br>NA |                                                                                                                              |
|                              |    | (e) Describe any sensitivity analyses                                                                                                                                                                                                                                                                     | Yes                                                                                               | Sensitivity Analysis. Page 13.                                                                                               |

Continued on next page

| Results          |     | Included                                                                                                                                                                                                     | Reference |                                                                                                                                               |
|------------------|-----|--------------------------------------------------------------------------------------------------------------------------------------------------------------------------------------------------------------|-----------|-----------------------------------------------------------------------------------------------------------------------------------------------|
| Participants     | 13* | (a) Report numbers of individuals at each stage of study—eg numbers potentially eligible, examined for eligibility, confirmed eligible, included in the study, completing follow-up, and analysed            | Yes       | PRISMA Diagram, Figure 1 and page 8 under Search Strategy.                                                                                    |
|                  |     | (b) Give reasons for non-participation at each stage                                                                                                                                                         | NA        | All studies that met inclusion and exclusion criteria were included                                                                           |
|                  |     | (c) Consider use of a flow diagram                                                                                                                                                                           | Yes       | PRISMA Diagram, Figure 1                                                                                                                      |
| Descriptive data | 14* | (a) Give characteristics of study participants (eg demographic, clinical, social) and information on exposures and potential confounders                                                                     | Yes       | Study characteristics. Page 13-14.                                                                                                            |
|                  |     | (b) Indicate number of participants with missing data for each variable of interest                                                                                                                          | NA        | No missing data as preprints and final publications were obtained for each included study.                                                    |
|                  |     | (c) <i>Cohort study</i> —Summarise follow-up time (eg, average and total amount)                                                                                                                             | NA        |                                                                                                                                               |
| Outcome data     | 15* | <i>Cohort study</i> —Report numbers of outcome events or summary measures over time                                                                                                                          | Yes       | Tables 1-5, Discrepancies in study characteristics – page 14, Discrepancies in results reporting, page 14-15. Discrepancies in spin, page 15. |
|                  |     | <i>Case-control study</i> —Report numbers in each exposure category, or summary measures of exposure                                                                                                         | NA        |                                                                                                                                               |
|                  |     | <i>Cross-sectional study</i> —Report numbers of outcome events or summary measures                                                                                                                           | NA        |                                                                                                                                               |
| Main results     | 16  | (a) Give unadjusted estimates and, if applicable, confounder-adjusted estimates and their precision (eg, 95% confidence interval). Make clear which confounders were adjusted for and why they were included | Yes       | <i>Unadjusted estimates</i> - Tables 1-4                                                                                                      |
|                  |     | (b) Report category boundaries when continuous variables were categorized                                                                                                                                    | NA        |                                                                                                                                               |
|                  |     | (c) If relevant, consider translating estimates of relative risk into absolute risk for a meaningful time period                                                                                             | NA        |                                                                                                                                               |

|                          |    |                                                                                                                                                                            |     |                                                                               |
|--------------------------|----|----------------------------------------------------------------------------------------------------------------------------------------------------------------------------|-----|-------------------------------------------------------------------------------|
| Other analyses           | 17 | Report other analyses done—eg analyses of subgroups and interactions, and sensitivity analyses                                                                             | Yes | Sensitivity analysis, page 16 and Supplemental file. Tables S1 – S4.          |
| <b>Discussion</b>        |    |                                                                                                                                                                            |     |                                                                               |
| Key results              | 18 | Summarise key results with reference to study objectives                                                                                                                   | Yes | Principal Findings: Page 16-17                                                |
| Limitations              | 19 | Discuss limitations of the study, taking into account sources of potential bias or imprecision. Discuss both direction and magnitude of any potential bias                 | Yes | Strengths and weaknesses: Pages 20-21                                         |
| Interpretation           | 20 | Give a cautious overall interpretation of results considering objectives, limitations, multiplicity of analyses, results from similar studies, and other relevant evidence | Yes | Discussion re peer review - Pages 18. Overall conclusion – page 21            |
| Generalisability         | 21 | Discuss the generalisability (external validity) of the study results                                                                                                      | Yes | Comparison to other studies – page 19-20. Strengths and weaknesses – page 20. |
| <b>Other information</b> |    |                                                                                                                                                                            |     |                                                                               |
| Funding                  | 22 | Give the source of funding and the role of the funders for the present study and, if applicable, for the original study on which the present article is based              | Yes | page 21                                                                       |

\*Give information separately for cases and controls in case-control studies and, if applicable, for exposed and unexposed groups in cohort and cross-sectional studies.

**Note:** An Explanation and Elaboration article discusses each checklist item and gives methodological background and published examples of transparent reporting. The STROBE checklist is best used in conjunction with this article (freely available on the Web sites of PLoS Medicine at <http://www.plosmedicine.org/>, Annals of Internal Medicine at <http://www.annals.org/>, and Epidemiology at <http://www.epidem.com/>). Information on the STROBE Initiative is available at [www.strobe-statement.org](http://www.strobe-statement.org).
